# Supplementary material for: A Comprehensive Framework for Physiologically‐Based Pharmacokinetic Modeling in Matlab
Source: PubMed Central journal article supplement — CPT Pharmacometrics Syst Pharmacol. 2019 Apr 2;8(7):444–59. doi: 10.1002/psp4.12399 (PMC6657005; doi:10.1002/psp4.12399), 2019-04-02
Supplement: PSP4-8-444-s001.pdf [file PSP4-8-444-s001.pdf]

**Supplement - A comprehensive framework for physiologically based pharmacokinetic modelling in Matlab®**

Table S1: Parameters and their abbreviation and units used to build a PBPK model.

| Parameter                                                 | Abbreviation          | Unit                                                                                                                                                  |
|-----------------------------------------------------------|-----------------------|-------------------------------------------------------------------------------------------------------------------------------------------------------|
| concentration of acidic phospholipids                     | [AP]                  | -                                                                                                                                                     |
| inhibitor concentration                                   | [Inh]                 | mg/L                                                                                                                                                  |
| substrate concentration                                   | [Sub]                 | mg/L                                                                                                                                                  |
| abundance                                                 | AB                    | hepatic enzymes: pmol/mg<br>hepatic transporter: pmol/Mio cells<br>intestinal enzymes: nmol/intestine<br>intestinal transporter: fmol/cm <sup>2</sup> |
| time-dependent abundance                                  | ABt                   | hepatic enzymes: pmol/mg<br>hepatic transporter: pmol/Mio cells<br>intestinal enzymes: nmol/intestine<br>intestinal transporter: fmol/cm <sup>2</sup> |
| blood-to-plasma ratio                                     | BP                    | -                                                                                                                                                     |
| concentration                                             | C                     | mg/L                                                                                                                                                  |
| clearance                                                 | CL                    | L/h                                                                                                                                                   |
| absorption clearance                                      | CL <sub>ab</sub>      | L/h                                                                                                                                                   |
| intrinsic clearance of an enzymatic / transporter isoform | CL <sub>int</sub>     | μL/min/pmol enzyme / transporter                                                                                                                      |
| intrinsic clearance not assigned to a specific enzyme     | CL <sub>int,hep</sub> | μL/min/mg protein                                                                                                                                     |
| cardiac output                                            | CO                    | L/h                                                                                                                                                   |
| fraction of extracellular water                           | f <sub>EW</sub>       | -                                                                                                                                                     |
| fraction of intracellular water                           | f <sub>iw</sub>       | -                                                                                                                                                     |
| fraction of neutral lipids                                | f <sub>NL</sub>       | -                                                                                                                                                     |
| fraction of neutral phospholipids                         | f <sub>NP</sub>       | -                                                                                                                                                     |
| fraction unbound                                          | f <sub>u</sub>        | -                                                                                                                                                     |
| fold expansion factor for the villi of the surface area   | F <sub>villi</sub>    | -                                                                                                                                                     |
| glomerular filtration rate                                | GFR                   | mL/min                                                                                                                                                |
| hematocrit                                                | HCT                   | -                                                                                                                                                     |
| hepatocytes per gram liver                                | HPGL                  | Mio cells / g liver                                                                                                                                   |
| half maximal inducer concentration                        | IC <sub>50</sub>      | μM                                                                                                                                                    |
| maximum fold induction                                    | IndMax                | -                                                                                                                                                     |
| flux                                                      | J                     | L/h                                                                                                                                                   |
| affinity constant for acidic phospholipids                | KaAP                  | -                                                                                                                                                     |
| apparent inhibition constant                              | K <sub>app</sub>      | μM                                                                                                                                                    |
| affinity constant for binding proteins                    | KaPR                  | -                                                                                                                                                     |

| <b>Parameter</b>                                 | <b>Abbreviation</b> | <b>Unit</b>                        |
|--------------------------------------------------|---------------------|------------------------------------|
| degradation rate                                 | $k_{deg}$           | 1/h                                |
| inhibition constant                              | $K_i$               | $\mu\text{M}$                      |
| inactivation rate                                | $k_{inact}$         | 1/h                                |
| ionized form                                     | $K_{io}$            | -                                  |
| Michaelis-Menten constant                        | $K_m$               | $\mu\text{M}$                      |
| partition coefficient of plasma binding proteins | $K_{pPR}$           | -                                  |
| unbound drug partition coefficient               | $K_{pu}$            | -                                  |
| length                                           | $L_e$               | cm                                 |
| lymph flow                                       | $L$                 | L/h                                |
| vegetable oil-water partition coefficient        | $\log D$            | -                                  |
| octanol-water partition coefficient              | $\log P$            | -                                  |
| total lymph flow                                 | $L_{tot}$           | L/h                                |
| microsomal proteins per gram liver               | $MPPGL$             | mg / g liver                       |
| apparent permeability                            | $P_{app}$           | $10^{-6}$ cm/sec                   |
| effective permeability in man                    | $P_{eff,man}$       | $10^{-4}$ cm/sec                   |
| binding protein concentration                    | $PR$                | g/L                                |
| permeability surface area                        | $PSA$               | $\text{cm}^2$                      |
| blood flow                                       | $Q$                 | L/h                                |
| radius                                           | $r$                 | cm                                 |
| volume                                           | $V$                 | L                                  |
| maximum velocity                                 | $V_{max}$           | pmol/min/pmol enzyme / transporter |
| volume of distribution at steady state           | $V_{ss}$            | L                                  |

Table S2: Subscripts and their abbreviation used to build the PBPK model.

| <b>Parameter</b>                                                                   | <b>Abbreviation</b> |
|------------------------------------------------------------------------------------|---------------------|
| arterial blood                                                                     | ab                  |
| additional                                                                         | ad                  |
| adipose                                                                            | AD                  |
| bone                                                                               | BO                  |
| brain                                                                              | BR                  |
| intracellular space                                                                | cel                 |
| enzyme                                                                             | E                   |
| efflux                                                                             | ef                  |
| gonads                                                                             | GO                  |
| gut                                                                                | GU                  |
| gut                                                                                | gut                 |
| hepatic arterial                                                                   | ha                  |
| heart                                                                              | HE                  |
| hepatic                                                                            | hep                 |
| interstitial space                                                                 | ine                 |
| intracellular water                                                                | IW                  |
| kidney                                                                             | KI                  |
| liver                                                                              | LI                  |
| lymph-node                                                                         | LN                  |
| lung                                                                               | LU                  |
| muscle                                                                             | MU                  |
| organ                                                                              | org                 |
| pancreas                                                                           | PA                  |
| plasma                                                                             | PL                  |
| portal vein bypass                                                                 | PVBY                |
| renal                                                                              | R                   |
| red blood cells                                                                    | RBC                 |
| remaining organ                                                                    | RE                  |
| refers to a 30 years old subject arbitrarily chosen to represent a "young" subject | Ref                 |
| skin                                                                               | SK                  |
| spleen                                                                             | SP                  |
| transporter                                                                        | T                   |

| <b>Parameter</b> | <b>Abbreviation</b> |
|------------------|---------------------|
| thymus           | TH                  |
| total            | tot                 |
| uptake           | up                  |
| vascular space   | vas                 |
| venous blood     | vb                  |
