# Supplementary material for: A Comprehensive Framework for Physiologically‐Based Pharmacokinetic Modeling in Matlab
Source: PubMed Central journal article supplement — CPT Pharmacometrics Syst Pharmacol. 2019 Apr 2;8(7):444–59. doi: 10.1002/psp4.12399 (PMC6657005; doi:10.1002/psp4.12399), 2019-04-02
Supplement: PSP4-8-444-s002.pdf [file PSP4-8-444-s002.pdf]

%Main function: Calls each function of a PBPK model

```
clear all;           %clear all variables from previous simulations
close all;          %close all windows from previous simulations
clc;                %clear command window

DefineParameters;   %model structure and parameters are defined
Population;         %the defined population is generated
Drug;               %load drug files / in vitro-to-in vivo extrapolation
SolveODE;           %solve the ordinary differential equations
PostProcessing;     %process the data from the ODE solution / output results
```

```

function[] = DefineParameters()
%This function defines the population, model structure (PBPK compartments),
%the drugs, the virtual trial design and the simulation settings to be used

global DEF          %global DEF defines model parameters
global SYSTEM      %global SYSTEM defines sytem parameters
global DRUG         %global DRUG defines drug parameters
global STUDY        %global STUDY defines study design parameters
global MODEL        %global MODEL defines parameters important for modeling
global OBS          %global OBS saves observed parameters for the output

%define parameters used in the script
pop = 1;    com = 2;    seg = 3;    cyp = 4;    dru = 5;    pro = 6;    adm = 7;

%__Define Model parameters and the structure_____
%% Population %%%%%%%%%%%%%%%%%%%%%%%%%%%%%%%%%%%%%%%%%%%%%%%%%%%%%%%%%%%%%%%
DEF.AgingCaucasian = 1;    DEF.name{pop, DEF.AgingCaucasian} = 'AgingCaucasian';

%% Compartments %%%%%%%%%%%%%%%%%%%%%%%%%%%%%%%%%%%%%%%%%%%%%%%%%%%%%%%%%%%%%%%
%RBC = red blood cells
DEF.lung          = 1;    DEF.name{com, DEF.lung}          = 'lung';
DEF.adipose       = 2;    DEF.name{com, DEF.adipose}       = 'adipose';
DEF.bone          = 3;    DEF.name{com, DEF.bone}         = 'bone';
DEF.brain         = 4;    DEF.name{com, DEF.brain}        = 'brain';
DEF.gonads        = 5;    DEF.name{com, DEF.gonads}       = 'gonads';
DEF.heart         = 6;    DEF.name{com, DEF.heart}        = 'heart';
DEF.kidney        = 7;    DEF.name{com, DEF.kidney}       = 'kidney';
DEF.muscle        = 8;    DEF.name{com, DEF.muscle}       = 'muscle';
DEF.skin          = 9;    DEF.name{com, DEF.skin}         = 'skin';
DEF.thymus        = 10;   DEF.name{com, DEF.thymus}       = 'thymus';
DEF.gut           = 11;   DEF.name{com, DEF.gut}          = 'gut';
DEF.spleen        = 12;   DEF.name{com, DEF.spleen}       = 'spleen';
DEF.pancreas      = 13;   DEF.name{com, DEF.pancreas}     = 'pancreas';
DEF.liver         = 14;   DEF.name{com, DEF.liver}        = 'liver';
DEF.lymphnode     = 15;   DEF.name{com, DEF.lymphnode}    = 'lymphnode';
DEF.remaining     = 16;   DEF.name{com, DEF.remaining}    = 'remaining';
DEF.plasma        = 17;   DEF.name{com, DEF.plasma}       = 'plasma';
DEF.RBC           = 18;   DEF.name{com, DEF.RBC}         = 'RBC';

Comp = [DEF.lung DEF.adipose DEF.bone DEF.brain DEF.gonads DEF.heart ...
        DEF.kidney DEF.muscle DEF.skin DEF.thymus DEF.gut DEF.spleen ...
        DEF.pancreas DEF.liver DEF.lymphnode DEF.remaining DEF.plasma ...
        DEF.RBC];

Org = [DEF.lung DEF.adipose DEF.bone DEF.brain DEF.gonads DEF.heart ...
        DEF.kidney DEF.muscle DEF.skin DEF.thymus DEF.gut DEF.spleen ...
        DEF.pancreas DEF.liver DEF.lymphnode DEF.remaining];

%how many compartments are used with and without the blood?
CompNo = length(Comp);    SYSTEM.CompNo = CompNo;
OrgNo = length(Org);    SYSTEM.OrgNo = OrgNo;

%% intestinal segments %%%%%%%%%%%%%%%%%%%%%%%%%%%%%%%%%%%%%%%%%%%%%%%%%%%%%%%%%%%
DEF.stomach = 1;    DEF.name{seg, DEF.stomach} = 'stomach';

```

```

DEF.duodenum = 2;          DEF.name{seg, DEF.duodenum} = 'duodenum';
DEF.jejunum  = 3;          DEF.name{seg, DEF.jejunum}  = 'jejunum';
DEF.ileum    = 4;          DEF.name{seg, DEF.ileum}    = 'ileum';
DEF.colon    = 5;          DEF.name{seg, DEF.colon}    = 'colon';
DEF.faeces   = 6;          DEF.name{seg, DEF.faeces}   = 'faeces';

Seg = [DEF.stomach DEF.duodenum DEF.jejunum DEF.ileum DEF.colon DEF.faeces];

%how many intestinal segments are modelled?
SegNo = length(Seg);      SYSTEM.SegNo = SegNo;

%% CYP enzymes (for dynamic abundance for MBI and induction) %%%%%%%%%%%
DEF.CYP2D6 = 1;           DEF.name{cyp, DEF.CYP2D6} = 'CYP2D6';
DEF.CYP3A4 = 2;           DEF.name{cyp, DEF.CYP3A4} = 'CYP3A4';
DEF.CYP3A5 = 3;           DEF.name{cyp, DEF.CYP3A5} = 'CYP3A5';
DEF.CYP2J2 = 4;           DEF.name{cyp, DEF.CYP2J2} = 'CYP2J2';

CYPlI = [DEF.CYP2D6 DEF.CYP3A4 DEF.CYP3A5 DEF.CYP2J2];
CYPin = [DEF.CYP2D6 DEF.CYP3A4 DEF.CYP3A5];

%how many CYP enzymes are in the liver (li) or intestine (in)?
CYPlINo = length(CYPlI);  SYSTEM.CYPlINo = CYPlINo;
CYPinNo = length(CYPin);  SYSTEM.CYPinNo = CYPinNo;

%% Subcompartments %%%%%%%%%%%
%the number of subcompartments are also the number of equations

Sub(DEF.lung)      = 2;    Sub(DEF.adipose)   = 2;    Sub(DEF.bone)      = 2;
Sub(DEF.brain)     = 2;    Sub(DEF.gonads)    = 2;    Sub(DEF.heart)     = 2;
Sub(DEF.kidney)    = 2;    Sub(DEF.muscle)    = 2;    Sub(DEF.skin)      = 2;
Sub(DEF.thymus)    = 2;    Sub(DEF.gut)       = 1;    Sub(DEF.spleen)    = 2;
Sub(DEF.pancreas)  = 2;    Sub(DEF.liver)     = 2;    Sub(DEF.lymphnode) = 2;
Sub(DEF.remaining) = 2;    Sub(DEF.plasma)    = 0;    Sub(DEF.RBC)       = 0;

Sub(CompNo + DEF.stomach) = 0;    Sub(CompNo + DEF.duodenum) = 2;
Sub(CompNo + DEF.jejunum) = 2;    Sub(CompNo + DEF.ileum)     = 2;
Sub(CompNo + DEF.colon)   = 2;    Sub(CompNo + DEF.faeces)    = 0;

Sub(CompNo + SegNo + DEF.CYP2D6) = 3;    Sub(CompNo + SegNo + DEF.CYP3A4) = 3;
Sub(CompNo + SegNo + DEF.CYP3A5) = 3;    Sub(CompNo + SegNo + DEF.CYP2J2) = 0;

%define the number of subcompartments
SubNo = zeros(1, CompNo + SegNo + CYPlINo);
for tot = 1:(CompNo + SegNo + CYPlINo)
    if tot == 0
        SubNo(tot) = 0;

    else
        SubNo(tot) = sum(Sub(1:tot-1));
    end
end

SYSTEM.SubNo = SubNo;

```

```
%number of ODEs to solve
ODENo = CompNo + SegNo + CYPLiNo + sum(Sub);    MODEL.ODENo = ODENo;

%%% Drugs %%%%%%%%%%%%%%%%%%%%%%%%%%%%%%%%%%%%%%%%%%%%%%%%%%%%%%%%%%%%%%%%%%%%%%%%%
DEF.darunavir = 1;    DEF.name{dru, DEF.darunavir} = 'darunavir';
DEF.ritonavir = 2;    DEF.name{dru, DEF.ritonavir} = 'ritonavir';
DEF.rivaroxaban = 3;    DEF.name{dru, DEF.rivaroxaban} = 'rivaroxaban';

DrugLib = [DEF.darunavir DEF.ritonavir DEF.rivaroxaban];

%How many drug files are in the libraray?
DEF.DrugLibNo = length(DrugLib);

%%% Main binding protein %%%%%%%%%%%%%%%%%%%%%%%%%%%%%%%%%%%%%%%%%%%%%%%%%%%%%%%%%%%%%%%%%%%%%%%%%
%AAG = alpha acidic glycoprotein
DEF.albumin = 1;    DEF.name{pro, DEF.albumin} = 'albumin';
DEF.AAG = 2;    DEF.name{pro, DEF.AAG} = 'AAG';

%%% Route of administration %%%%%%%%%%%%%%%%%%%%%%%%%%%%%%%%%%%%%%%%%%%%%%%%%%%%%%%%%%%%%%%%%%%%%%%%%
DEF.iv = 1;    DEF.name{adm, DEF.iv} = 'iv';
DEF.oral = 2;    DEF.name{adm, DEF.oral} = 'oral';

%=====
%_The user chooses the simulation settings_____
%%% Drug %%%%%%%%%%%%%%%%%%%%%%%%%%%%%%%%%%%%%%%%%%%%%%%%%%%%%%%%%%%%%%%%%%%%%%%%%
%how many drugs should be simulated in parallel?
DRUG.DrugNo = 3;

%enter the name of each simulated drug
DRUG.DrugName = zeros(1, DRUG.DrugNo);

for d = 1:DRUG.DrugNo
    switch d
        case 1    %drug 1
            DRUG.DrugName(d) = DEF.darunavir;

        case 2    %drug 2
            DRUG.DrugName(d) = DEF.ritonavir;

        case 3    %drug 3
            DRUG.DrugName(d) = DEF.rivaroxaban;

    end
end

%%% Virtual study design %%%%%%%%%%%%%%%%%%%%%%%%%%%%%%%%%%%%%%%%%%%%%%%%%%%%%%%%%%%%%%%%%%%%%%%%%
STUDY.TrialNo = 10;    %number of trials
STUDY.IndTrialNo = 12;    %number of individuals per trial

%total number of subjects to be simulated
STUDY.IndNo = STUDY.TrialNo * STUDY.IndTrialNo;
```

```
STUDY.PropFem      = 0;      %proportion of women

STUDY.AgeMin       = 20;      %minimal age in the simulation in [years]
STUDY.AgeMax       = 50;      %maximum age in the simulation in [years]

STUDY.Resolution   = 10;      %resolution of each time unit

%prepare empty vectors for dosing regimen
AdminRoute         = zeros(1, DRUG.DrugNo);      %route of administration
NoDoses            = zeros(1, DRUG.DrugNo);      %number of doses
Dose               = zeros(1, DRUG.DrugNo);      %dose in [mg]
StartDose          = zeros(1, DRUG.DrugNo);      %when is the drug given? [h]
DoseIntervall      = zeros(1, DRUG.DrugNo);      %intervall between doses in [h]
LastTime           = zeros(1, DRUG.DrugNo);      %prolongation in [h]

for d = 1:DRUG.DrugNo
    switch d
        case 1
            AdminRoute(d)      = DEF.oral;
            NoDoses(d)         = 7;
            Dose(d)            = 800;
            StartDose(d)       = 0;
            DoseIntervall(d)   = 24;
            LastTime(d)        = 0;

        case 2
            AdminRoute(d)      = DEF.oral;
            NoDoses(d)         = 7;
            Dose(d)            = 100;
            StartDose(d)       = 0;
            DoseIntervall(d)   = 24;
            LastTime(d)        = 0;

        case 3
            AdminRoute(d)      = DEF.oral;
            NoDoses(d)         = 1;
            Dose(d)            = 10;
            StartDose(d)       = 144;
            DoseIntervall(d)   = 24;
            LastTime(d)        = 24;
    end
end

%% Enter observed data to compare to the simulated outcome %%%%%%%%%%%
OBS.Time_Drug1 = [];
OBS.Conc_Drug1 = [];
OBS.SD_Drug1   = [];

OBS.Time_Drug2 = [];
OBS.Conc_Drug2 = [];
OBS.SD_Drug2   = [];

OBS.Time_Drug3 = [];
```

```

OBS.Conc_Drug3 = [];
OBS.SD_Drug3   = [];

OBS.Time_DDI1  = [];
OBS.Conc_DDI1  = [];
OBS.SD_DDI1    = [];

OBS.Time_DDI2  = [];
OBS.Conc_DDI2  = [];
OBS.SD_DDI2    = [];

OBS.Time_DDI3  = [];
OBS.Conc_DDI3  = [];
OBS.SD_DDI3    = [];

%=====
%_set up a dose event matrix_
%define the name of columns for the dose event matrix
start = 1;   ende = 2;   dose = 3;   admin = 4;   res = 5;   mmr = 6;

NoColDoseEvent = length([start, ende, dose, admin, res, mmr]);
Regimen = zeros( max(NoDoses), NoColDoseEvent, DRUG.DrugNo);

%% Combine all dosing events in one matrix %%%%%%%%%%%
%define the start and end of each dosing event for each drug
%dose and route of administration are assigned to each dosing event

for d = 1:DRUG.DrugNo
    for m = 1:NoDoses(d)

        %a case is defined for single doses
        if m == 1
            Regimen(1, start, d) = 0 + StartDose(d);
            Regimen(1, ende, d)  = Regimen(1, start, d) + DoseIntervall(d) + ...
                LastTime(d);

        %a case is defined for multiple doses
        else
            Regimen(1, start, d) = 0 + StartDose(d);
            Regimen(1, ende, d)  = Regimen(1, start, d) + DoseIntervall(d);

            Regimen(m, start, d) = Regimen(m-1, ende, d);
            Regimen(m, ende, d)  = Regimen(m, start, d) + DoseIntervall(d);

            %a case is defined for the last dose to prolong the elimination phase
            if m == NoDoses(d)
                Regimen(m, ende, d) = Regimen(m, start, d) + ...
                    DoseIntervall(d) + ...
                    LastTime(d);
            end
        end
    end

    Regimen(m, dose, d) = Dose(d);

```

```

Regimen(m, admin, d) = AdminRoute(d);
Regimen(m, res, d) = (Regimen(m, ende, d) - Regimen(m, start, d)) .* ...
                    STUDY.Resolution;

if m == 1
    Regimen(1, mmr, d) = 0;

else
    Regimen(m, mmr, d) = Regimen(m-1, mmr, d) + ...
                        (Regimen(m-1, ende, d) - Regimen(m-1, start, d)) .*
*...
                        STUDY.Resolution;

end
end
end

%% find unique dosing events %%%%%%%%%%%%%%%%%%%%%%%%%%%%%%%%%%%%%%%%%%
%extract dosing events for each drug and delete zero values
for d = 1:DRUG.DrugNo
    switch d
        case 1
            Drug1Regimen = sortrows(Regimen(:, :, d), start);
            Drug1Regimen( ~any(Drug1Regimen, 2), :) = [];

        case 2
            Drug2Regimen = sortrows(Regimen(:, :, d), start);
            Drug2Regimen( ~any(Drug2Regimen, 2), :) = [];

        case 3
            Drug3Regimen = sortrows(Regimen(:, :, d), start);
            Drug3Regimen( ~any(Drug3Regimen, 2), :) = [];

    end
end

%combine dosing regimens of the different drugs and look for unique events
switch DRUG.DrugNo
    case 1
        Drug1RegMat = Drug1Regimen;
        Drug1RegFun = RegimenFun(Drug1RegMat, NoDoses(1));

    case 2
        Drug1RegMat = [Drug1Regimen; Drug2Regimen];
        Drug1RegFun = RegimenFun(Drug1RegMat, NoDoses(1));

        Drug2RegMat = [Drug2Regimen; Drug1Regimen];
        Drug2RegFun = RegimenFun(Drug2RegMat, NoDoses(2));

    case 3
        Drug1RegMat = [Drug1Regimen; Drug2Regimen; Drug3Regimen];
        Drug1RegFun = RegimenFun(Drug1RegMat, NoDoses(1));

        Drug2RegMat = [Drug2Regimen; Drug1Regimen; Drug3Regimen];
        Drug2RegFun = RegimenFun(Drug2RegMat, NoDoses(2));

```

```
Drug3RegMat = [Drug3Regimen; Drug1Regimen; Drug2Regimen];
Drug3RegFun = RegimenFun(Drug3RegMat, NoDoses(3));
end

%prolongation of the terminal time needs to be considered for all drugs
switch DRUG.DrugNo
case 1
    StartTime = Drug1RegFun(:, start);
    EndTime    = Drug1RegFun(:, ende);
case 2
    StartTime = [Drug1RegFun(:, start); Drug2RegFun(:, start)];
    EndTime    = [Drug1RegFun(:, ende); Drug2RegFun(:, ende)];

case 3
    StartTime = [Drug1RegFun(:, start); Drug2RegFun(:, start); Drug3RegFun(:,
start)];
    EndTime    = [Drug1RegFun(:, ende); Drug2RegFun(:, ende); Drug3RegFun(:,
ende)];
end

%find unique start and end time and calculate the resolution
UniqueStartT = unique(StartTime);
UniqueEndT    = unique(EndTime);
for d = 1:DRUG.DrugNo
    if NoDoses(d) ~= 0
        if LastTime(d) ~= 0
            UniqueEndT(end-1) = UniqueEndT(end);
            UniqueEndT(end) = [];
        end
    end
end
end
ResolutionEvent = (UniqueEndT - UniqueStartT) .* STUDY.Resolution;
ResolutionAll = zeros(length(UniqueStartT), 1);
for a = 1:length(UniqueStartT)
    if a == 1
        ResolutionAll(a) = 0;
    else
        ResolutionAll(a) = ResolutionAll(a-1) + ...
            (UniqueEndT(a-1) - UniqueStartT(a-1)) .* STUDY.
Resolution;
    end
end

%each drug becomes the same start / end time and resolution
switch DRUG.DrugNo
case 1
    Drug1RegFun(:, start) = UniqueStartT;
    Drug1RegFun(:, ende)  = UniqueEndT;
    Drug1RegFun(:, res)   = ResolutionEvent;
    Drug1RegFun(:, mmr)   = ResolutionAll;
```



```
case 2
    Drug1RegFun(:, start) = UniqueStartT;
    Drug1RegFun(:, ende) = UniqueEndT;
    Drug1RegFun(:, res) = ResolutionEvent;
    Drug1RegFun(:, mmr) = ResolutionAll;

    Drug2RegFun(:, start) = UniqueStartT;
    Drug2RegFun(:, ende) = UniqueEndT;
    Drug2RegFun(:, res) = ResolutionEvent;
    Drug2RegFun(:, mmr) = ResolutionAll;

case 3
    Drug1RegFun(:, start) = UniqueStartT;
    Drug1RegFun(:, ende) = UniqueEndT;
    Drug1RegFun(:, res) = ResolutionEvent;
    Drug1RegFun(:, mmr) = ResolutionAll;

    Drug2RegFun(:, start) = UniqueStartT;
    Drug2RegFun(:, ende) = UniqueEndT;
    Drug2RegFun(:, res) = ResolutionEvent;
    Drug2RegFun(:, mmr) = ResolutionAll;

    Drug3RegFun(:, start) = UniqueStartT;
    Drug3RegFun(:, ende) = UniqueEndT;
    Drug3RegFun(:, res) = ResolutionEvent;
    Drug3RegFun(:, mmr) = ResolutionAll;

end

%what is the number of total events in the simulation?
NoEvents = length(Drug1RegFun(:, start));    STUDY.NoEvents = NoEvents;

%combine the dosing regimen for all drugs
DoseEventMat = zeros(NoEvents, NoColDoseEvent, DRUG.DrugNo);
switch DRUG.DrugNo
    case 1
        DoseEventMat(:, :, 1) = Drug1RegFun;

    case 2
        DoseEventMat(:, :, 1) = Drug1RegFun;
        DoseEventMat(:, :, 2) = Drug2RegFun;

    case 3
        DoseEventMat(:, :, 1) = Drug1RegFun;
        DoseEventMat(:, :, 2) = Drug2RegFun;
        DoseEventMat(:, :, 3) = Drug3RegFun;

end

%save the dose event matrix globally
STUDY.DoseEventMat = DoseEventMat;
STUDY.Dose = Dose;
STUDY.NoDoses = NoDoses;

%=====
```

```
%% USED FUNCTION %%%%%%%%%%%%%%%%%%%%%%%%%%%%%%%%%%%%%%%%%%%%%%%%%%%%%%%%%%%%%%%%%%%%%%%%%%  
%=====
```

```
function DrugReg = RegimenFun(DrugMat, NoDoses)
```

```
    %dosing events from other drugs are set to zero  
    DrugMat(NoDoses + 1:end, [dose, admin, res, mmr]) = 0;
```

```
    %drug events are sorted based on the start time  
    DrugSort = sortrows(DrugMat, start);
```

```
    %find unique time points  
    [~, idx] = unique(DrugSort(:, start));
```

```
    %ouput results of the used function  
    DrugReg = DrugSort(idx, :);
```

```
end
```

```
end
```

```

function[] = Population()
%This function generates the virtual population based on the user settings
%Attention: the normrnd command needs to Statistics and Machine Learning Toolbox

global DEF          %global DEF defines model parameters
global SYSTEM      %global SYSTEM defines sytem parameters
global STUDY       %global STUDY defines study design parameters

%_Age distribution_____
%Weibull distribution was fitted to data from Eurostat (Stader et al., 2018)
Age = round(61.73.*(-log(1 - rand(STUDY.IndNo, 1))).^(1/1.55));

%Weibull distribution are infinity and need to be truncated
for ind = 1:STUDY.IndNo
    while Age(ind) < STUDY.AgeMin || Age(ind) > STUDY.AgeMax
        Age(ind) = round(61.73.*(-log(1 - rand(1, 1))).^(1/1.55));
    end
end

%save age globally
SYSTEM.Age = Age;

%_Sex distribution_____
%number of women in the simulation - round ensure the number to be an integer
FemNo = round(STUDY.PropFem .* STUDY.IndNo);

%generate a matrix with random numbers
IndexSex = randperm(STUDY.IndNo);

%assign randomly a 1 to women and a 0 to men
Sex = zeros(STUDY.IndNo, 1);
Sex(IndexSex(1 : FemNo)) = 1;

%save sex globally
SYSTEM.Sex = Sex;

%_Anthropometric parameters_____
%Equations are published in Stader et al., 2018
%% Body height in [cm] %%%%%%%%%%%%%%%%%%%%%%%%%%%%%%%%%%%%%%%%%%%%%%%%%%%%%%%%%%%
Height_Mean = -0.0039.*Age.^2 + 0.238.*Age - 12.5.*Sex + 176;
Height_CV   = 3.8;
Height_Min  = [150, 140];
Height_Max  = [200, 180];

SYSTEM.Height = Calc_SysPar(Height_Mean, Height_CV, Height_Min, Height_Max);

%% Body weight in [kg] %%%%%%%%%%%%%%%%%%%%%%%%%%%%%%%%%%%%%%%%%%%%%%%%%%%%%%%%%%%
Weight_Mean = -0.0039.*Age.^2 + 1.12.*SYSTEM.Height + 0.611.*Age - ...
    0.424.*Sex - 137;
Weight_CV   = 15.2;
Weight_Min  = [50, 40];
Weight_Max  = [110, 90];
Weight_NoVa = -0.0039.*Age.^2 + 1.12.*Height_Mean + 0.611.*Age - 0.424.*Sex - 137;

```

```

SYSTEM.Weight = Calc_SysPar(Weight_Mean, Weight_CV, Weight_Min, Weight_Max);

%% Body Surface Area (BSA) according to DuBois & DuBois %%%%%%%%%%%%%%%%%%%%%%%%%%%%%%%%%%%%%%%%%%%%%%%%%%%%%%%%%%%%%%%%%%%%%%%%%
SYSTEM.BSA = 0.007184 .* SYSTEM.Height.^0.725 .* SYSTEM.Weight.^0.425;
BSA_NoVa    = 0.007184 .* Height_Mean.^0.725 .* Weight_NoVa.^0.425;

%_CYP enzymes phenotypes_____
%define variables
em = 1;      %EM = enhanced metaboliseres (2 allels)      - assign a random 1
pm = 2;      %PM = poor metaboliseres (0 allels)          - assign a random 0
um = 3;      %UM = ultrarapid metaboliseres (4 allels)    - assign a random 2

%we set up the frequencies for CYP enzymes
FreqCYP = zeros(SYSTEM.CYPLiNo, length([em, pm, um]));

%enter the frequencies when available
FreqCYP(DEF.CYP2D6, pm) = 0.08;
FreqCYP(DEF.CYP2D6, um) = 0.05;
FreqCYP(DEF.CYP3A5, pm) = 0.83;

%how many subjects per phenotype?
PhenNoCYP = round(FreqCYP .* STUDY.IndNo);
PhenNoCYP(:, em) = STUDY.IndNo - PhenNoCYP(:, pm) - PhenNoCYP(:, um);

%prepare vector for loop
PheCYP = ones(STUDY.IndNo, SYSTEM.CYPLiNo);
CYP_EM = num2cell(zeros(SYSTEM.CYPLiNo), 1);
CYP_PM = num2cell(zeros(SYSTEM.CYPLiNo), 1);
CYP_UM = num2cell(zeros(SYSTEM.CYPLiNo), 1);
CYP_All = num2cell(zeros(SYSTEM.CYPLiNo), 1);

for cyp = 1:SYSTEM.CYPLiNo
    CYP_EM{cyp} = ones(PhenNoCYP(cyp, em), 1);      %EMs get a 1
    CYP_PM{cyp} = zeros(PhenNoCYP(cyp, pm), 1);    %PMs get a 0
    CYP_UM{cyp} = 2*ones(PhenNoCYP(cyp, um), 1);   %UMs get a 3

    %combine all phenotypes
    CYP_All{cyp} = [CYP_EM{cyp}; CYP_PM{cyp}; CYP_UM{cyp}];

    %randomly assign 0 (PM) / 1 (EM) / 2 (UM) based on frequencies
    PheCYP(:, cyp) = CYP_All {cyp} (randperm(length(CYP_All {cyp} (:)))));
end

%_Blood parameters_____
%all parameters are from Stader et al., 2018

%% haematocrit (HCT) %%%%%%%%%%%%%%%%%%%%%%%%%%%%%%%%%%%%%%%%%%%%%%%%%%%%%%%%%%%%%%%%%%%%%%%%%
HCT_Mean = 0.443 - 0.033.*Sex;
HCT_CV   = 14.4;
HCT_Min  = [0.3, 0.3];
HCT_Max  = [0.5, 0.5];

```

```
SYSTEM.HCT = Calc_SysPar(HCT_Mean, HCT_CV, HCT_Min, HCT_Max);
```

```
%% albumin (HSA) %%%%%%%%%%%%%%%%%%%%%%%%%%%%%%%%%%%%%%%%%%%%%%%%%%%%%%%%%%%%%%%%%%%%%%%%%%
```

```
Albumin_Mean = - 0.0709.*Age + 47.7;
```

```
Albumin_CV = 7.9;
```

```
Albumin_Min = [35.8, 35.8];
```

```
Albumin_Max = [50.2, 50.2];
```

```
SYSTEM.Albumin = Calc_SysPar(Albumin_Mean, Albumin_CV, Albumin_Min, Albumin_Max);
```

```
%% alpha-acidic glycoprotein (AAG) %%%%%%%%%%%%%%%%%%%%%%%%%%%%%%%%%%%%%%%%%%%%%%%%%%%%%%%%%%%%%%%%%%%%%%%%%%
```

```
AAG_Mean = 0.798*ones(STUDY.IndNo, 1);
```

```
AAG_CV = 24.3;
```

```
AAG_Min = [0.476, 0.476];
```

```
AAG_Max = [1.22, 1.22];
```

```
SYSTEM.AAG = Calc_SysPar(AAG_Mean, AAG_CV, AAG_Min, AAG_Max);
```

```
% Organ weights (Worg) in [kg]
```

```
%all parameters are from Stader et al., 2018
```

---

```
SYSTEM.Worg = zeros(STUDY.IndNo, SYSTEM.CompNo);
```

```
%% Lungs (LU) %%%%%%%%%%%%%%%%%%%%%%%%%%%%%%%%%%%%%%%%%%%%%%%%%%%%%%%%%%%%%%%%%%%%%%%%%%
```

```
WLU_Mean = exp(0.00771.*Age + 0.0279.*SYSTEM.Height - 5.58);
```

```
WLU_CV = 0;
```

```
WLU_Min = [0.00453.*SYSTEM.Weight, 0.00453.*SYSTEM.Weight,];
```

```
WLU_Max = [0.0122.*SYSTEM.Weight, 0.0122.*SYSTEM.Weight,];
```

```
WLU_NoVa = exp(0.00771.*Age + 0.0279.*Height_Mean - 5.58);
```

```
SYSTEM.Worg(:, DEF.lung) = Calc_SysPar(WLU_Mean, WLU_CV, WLU_Min, WLU_Max);
```

```
%% Adipose (AD) %%%%%%%%%%%%%%%%%%%%%%%%%%%%%%%%%%%%%%%%%%%%%%%%%%%%%%%%%%%%%%%%%%%%%%%%%%
```

```
WAD_Mean = abs(0.68.*SYSTEM.Weight - 0.56.*SYSTEM.Height + 6.1.*Sex + 65);
```

```
WAD_CV = 29.6;
```

```
WAD_Min = [0.10.*SYSTEM.Weight, 0.21.*SYSTEM.Weight];
```

```
WAD_Max = [0.42.*SYSTEM.Weight, 0.59.*SYSTEM.Weight];
```

```
WAD_NoVa = abs(0.68.*Weight_NoVa - 0.56.*Height_Mean + 6.1.*Sex + 65);
```

```
SYSTEM.Worg(:, DEF.adipose) = Calc_SysPar(WAD_Mean, WAD_CV, WAD_Min, WAD_Max);
```

```
%% Bone (BO) %%%%%%%%%%%%%%%%%%%%%%%%%%%%%%%%%%%%%%%%%%%%%%%%%%%%%%%%%%%%%%%%%%%%%%%%%%
```

```
WBO_Mean = exp(0.024.*SYSTEM.Height - 1.9);
```

```
WBO_CV = 13.2;
```

```
WBO_Min = [0.079.*SYSTEM.Weight, 0.079.*SYSTEM.Weight];
```

```
WBO_Max = [0.13.*SYSTEM.Weight, 0.13.*SYSTEM.Weight];
```

```
WBO_NoVa = exp(0.024.*Height_Mean - 1.9);
```

```
SYSTEM.Worg(:, DEF.bone) = Calc_SysPar(WBO_Mean, WBO_CV, WBO_Min, WBO_Max);
```

```
%% Brain (BR) %%%%%%%%%%%%%%%%%%%%%%%%%%%%%%%%%%%%%%%%%%%%%%%%%%%%%%%%%%%%%%%%%%%%%%%%%%
```

```
WBR_Mean = exp(-0.00075.*Age + 0.00778.*SYSTEM.Height - 0.97);
```

```
WBR_CV = 9.0;
```

```
WBR_Min = [0.0168.*SYSTEM.Weight, 0.0168.*SYSTEM.Weight];  
WBR_Max = [0.0295.*SYSTEM.Weight, 0.0295.*SYSTEM.Weight];  
WBR_NoVa = exp(-0.00075.*Age + 0.00778.*Height_Mean - 0.97);
```

```
SYSTEM.Worg(:, DEF.brain) = Calc_SysPar(WBR_Mean, WBR_CV, WBR_Min, WBR_Max);
```

```
%%% Gonads (GO) %%%%%%%%%%%%%%%%%%%%%%%%%%%%%%%%%%%%%%%%%%%%%%%%%%%%%%%%%%%%%%%  
WGO_Mean = -0.00022.*Age - 0.00034.*SYSTEM.Weight - 0.030.*Sex + 0.082;  
WGO_CV = 34.8;  
WGO_Min = [0.00032.*SYSTEM.Weight, 0.00008.*SYSTEM.Weight];  
WGO_Max = [0.00066.*SYSTEM.Weight, 0.00017.*SYSTEM.Weight];  
WGO_NoVa = -0.00022.*Age - 0.00034.*Weight_NoVa - 0.030.*Sex + 0.082;
```

```
SYSTEM.Worg(:, DEF.gonads) = Calc_SysPar(WGO_Mean, WGO_CV, WGO_Min, WGO_Max);
```

```
%%% Heart (HE) %%%%%%%%%%%%%%%%%%%%%%%%%%%%%%%%%%%%%%%%%%%%%%%%%%%%%%%%%%%%%%%  
WHE_Mean = 0.34.*SYSTEM.BSA + 0.0018.*Age - 0.36;  
WHE_CV = 19.9;  
WHE_Min = [0.0018.*SYSTEM.Weight, 0.0018.*SYSTEM.Weight];  
WHE_Max = [0.0076.*SYSTEM.Weight, 0.0076.*SYSTEM.Weight];  
WHE_NoVa = 0.34.*BSA_NoVa + 0.0018.*Age - 0.36;
```

```
SYSTEM.Worg(:, DEF.heart) = Calc_SysPar(WHE_Mean, WHE_CV, WHE_Min, WHE_Max);
```

```
%%% Kidney (KI) %%%%%%%%%%%%%%%%%%%%%%%%%%%%%%%%%%%%%%%%%%%%%%%%%%%%%%%%%%%%%%%  
WKI_Mean = -0.00038.*Age - 0.056.*Sex + 0.33;  
WKI_CV = 21.2;  
WKI_Min = [0, 0];  
WKI_Max = [1, 1];  
WKI_NoVa = -0.00038.*Age - 0.056.*Sex + 0.33;
```

```
SYSTEM.Worg(:, DEF.kidney) = Calc_SysPar(WKI_Mean, WKI_CV, WKI_Min, WKI_Max);
```

```
%%% Muscle (MU) %%%%%%%%%%%%%%%%%%%%%%%%%%%%%%%%%%%%%%%%%%%%%%%%%%%%%%%%%%%%%%%  
WMU_Mean = 17.9.*SYSTEM.BSA - 0.0667.*Age - 5.68.*Sex - 1.22;  
WMU_CV = 11.8;  
WMU_Min = [0.310.*SYSTEM.Weight, 0.199.*SYSTEM.Weight];  
WMU_Max = [0.459.*SYSTEM.Weight, 0.388.*SYSTEM.Weight];  
WMU_NoVa = 17.9.*BSA_NoVa - 0.0667.*Age - 5.68.*Sex - 1.22;
```

```
SYSTEM.Worg(:, DEF.muscle) = Calc_SysPar(WMU_Mean, WMU_CV, WMU_Min, WMU_Max);
```

```
%%% Skin (SK) %%%%%%%%%%%%%%%%%%%%%%%%%%%%%%%%%%%%%%%%%%%%%%%%%%%%%%%%%%%%%%%  
WSK_Mean = exp(-0.0058.*Age - 0.37.*Sex + 1.13);  
WSK_CV = 8.3;  
WSK_Min = [0.0094.*SYSTEM.Weight, 0.0054.*SYSTEM.Weight];  
WSK_Max = [0.0479.*SYSTEM.Weight, 0.0411.*SYSTEM.Weight];  
WSK_NoVa = exp(-0.0058.*Age - 0.37.*Sex + 1.13);
```

```
SYSTEM.Worg(:, DEF.skin) = Calc_SysPar(WSK_Mean, WSK_CV, WSK_Min, WSK_Max);
```

```
%%% Thymus (TH) %%%%%%%%%%%%%%%%%%%%%%%%%%%%%%%%%%%%%%%%%%%%%%%%%%%%%%%%%%%%%%%  
WTH_Mean = 0.0221*ones(STUDY.IndNo, 1);
```

```
WTH_CV = 44.8;
WTH_Min = [0.00016.*SYSTEM.Weight, 0.00016.*SYSTEM.Weight];
WTH_Max = [0.00046.*SYSTEM.Weight, 0.00046.*SYSTEM.Weight];
WTH_NoVa = 0.0221*ones(STUDY.IndNo, 1);

SYSTEM.Worg(:, DEF.thymus) = Calc_SysPar(WTH_Mean, WTH_CV, WTH_Min, WTH_Max);

%%% Gut (GU) %%%%%%%%%%%%%%%%%%%%%%%%%%%%%%%%%%%%%%%%%%%%%%%%%%%%%%%%%%%%%%%%%%%%%%%%%
WGU_Mean = 3E-06.*SYSTEM.Height.^2.49;
WGU_CV = 7.3;
WGU_Min = [0, 0];
WGU_Max = [2, 2];
WGU_NoVa = 3E-06.*Height_Mean.^2.49;

SYSTEM.Worg(:, DEF.gut) = Calc_SysPar(WGU_Mean, WGU_CV, WGU_Min, WGU_Max);

%%% Spleen (SP) %%%%%%%%%%%%%%%%%%%%%%%%%%%%%%%%%%%%%%%%%%%%%%%%%%%%%%%%%%%%%%%%%%%%%%%%%
WSP_Mean = exp(1.13.*SYSTEM.BSA - 3.93);
WSP_CV = 51.7;
WSP_Min = [0.00098.*SYSTEM.Weight, 0.00098.*SYSTEM.Weight];
WSP_Max = [0.00321.*SYSTEM.Weight, 0.00321.*SYSTEM.Weight];
WSP_NoVa = exp(1.13.*BSA_NoVa - 3.93);

SYSTEM.Worg(:, DEF.spleen) = Calc_SysPar(WSP_Mean, WSP_CV, WSP_Min, WSP_Max);

%%% Pancreas (PA) %%%%%%%%%%%%%%%%%%%%%%%%%%%%%%%%%%%%%%%%%%%%%%%%%%%%%%%%%%%%%%%%%%%%%%%%%
WPA_Mean = 0.103*ones(STUDY.IndNo, 1);
WPA_CV = 27.8;
WPA_Min = [0, 0];
WPA_Max = [1, 1];
WPA_NoVa = 0.103*ones(STUDY.IndNo, 1);

SYSTEM.Worg(:, DEF.pancreas) = Calc_SysPar(WPA_Mean, WPA_CV, WPA_Min, WPA_Max);

%%% Liver (LI) %%%%%%%%%%%%%%%%%%%%%%%%%%%%%%%%%%%%%%%%%%%%%%%%%%%%%%%%%%%%%%%%%%%%%%%%%
WLI_Mean = exp(0.87.*SYSTEM.BSA - 0.014.*Age - 1.0);
WLI_CV = 23.7;
WLI_Min = [0.0147.*SYSTEM.Weight, 0.0147.*SYSTEM.Weight];
WLI_Max = [0.0332.*SYSTEM.Weight, 0.0332.*SYSTEM.Weight];
WLI_NoVa = exp(0.87.*BSA_NoVa - 0.014.*Age - 1.0);

SYSTEM.Worg(:, DEF.liver) = Calc_SysPar(WLI_Mean, WLI_CV, WLI_Min, WLI_Max);

%%% Lymphnode (LN) %%%%%%%%%%%%%%%%%%%%%%%%%%%%%%%%%%%%%%%%%%%%%%%%%%%%%%%%%%%%%%%%%%%%%%%%%
%data are from Gill et al., 2016
WLN_Mean = 0.00386.*SYSTEM.Weight;
WLN_CV = 30;
WLN_Min = [0, 0];
WLN_Max = [1, 1];
WLN_NoVa = 0.00386.*Weight_NoVa;

SYSTEM.Worg(:, DEF.lymphnode) = Calc_SysPar(WLN_Mean, WLN_CV, WLN_Min, WLN_Max);
```

```
%%% Blood %%%%%%%%%%%%%%%%%%%%%%%%%%%%%%%%%%%%%%%%%%%%%%%%%%%%%%%%%%%%%%%%%%%%%%%%%%
```

```
%weight of the entire blood
```

```
WBL = -0.0098.*Age - 1.89.*Sex + 6.06;
```

```
WorgBlood = normrnd(WBL, (10.4/100).*WBL);
```

```
%blood weight is split into plasma and red blood cells
```

```
SYSTEM.Worg(:, DEF.plasma) = WorgBlood.*(1 - 0.91.*SYSTEM.HCT);
```

```
SYSTEM.Worg(:, DEF.RBC) = WorgBlood - SYSTEM.Worg(:, DEF.plasma);
```

```
%weight of venous (VB) and arterial blood (AB)
```

```
SYSTEM.Wvein = (2/3).*WorgBlood;
```

```
SYSTEM.Wartery = (1/3).*WorgBlood;
```

```
%%% Remaining (RE) %%%%%%%%%%%%%%%%%%%%%%%%%%%%%%%%%%%%%%%%%%%%%%%%%%%%%%%%%%%%%%%%%%%%%%%%%%
```

```
SYSTEM.Worg(:, DEF.remaining) = SYSTEM.Weight - ...
    SYSTEM.Worg(:, DEF.lung) - ...
    SYSTEM.Worg(:, DEF.adipose) - ...
    SYSTEM.Worg(:, DEF.bone) - ...
    SYSTEM.Worg(:, DEF.brain) - ...
    SYSTEM.Worg(:, DEF.gonads) - ...
    SYSTEM.Worg(:, DEF.heart) - ...
    SYSTEM.Worg(:, DEF.kidney) - ...
    SYSTEM.Worg(:, DEF.muscle) - ...
    SYSTEM.Worg(:, DEF.skin) - ...
    SYSTEM.Worg(:, DEF.thymus) - ...
    SYSTEM.Worg(:, DEF.gut) - ...
    SYSTEM.Worg(:, DEF.spleen) - ...
    SYSTEM.Worg(:, DEF.pancreas) - ...
    SYSTEM.Worg(:, DEF.liver) - ...
    SYSTEM.Worg(:, DEF.lymphnode) - ...
    SYSTEM.Worg(:, DEF.plasma) - ...
    SYSTEM.Worg(:, DEF.RBC);
```

```
%because of the random variability, the remaining organ weight can be negative
%in these cases, the additional random variability is removed
```

```
for ind = 1:STUDY.IndNo
```

```
    if SYSTEM.Worg(ind, DEF.remaining) < 0
```

```
        SYSTEM.Height(ind) = Height_Mean(ind);
```

```
        SYSTEM.Weight(ind) = Weight_NoVa(ind);
```

```
        SYSTEM.BSA(ind) = BSA_NoVa(ind);
```

```
        SYSTEM.Worg(ind, DEF.lung) = WLU_NoVa(ind);
```

```
        SYSTEM.Worg(ind, DEF.adipose) = WAD_NoVa(ind);
```

```
        SYSTEM.Worg(ind, DEF.bone) = WBO_NoVa(ind);
```

```
        SYSTEM.Worg(ind, DEF.brain) = WBR_NoVa(ind);
```

```
        SYSTEM.Worg(ind, DEF.gonads) = WGO_NoVa(ind);
```

```
        SYSTEM.Worg(ind, DEF.heart) = WHE_NoVa(ind);
```

```
        SYSTEM.Worg(ind, DEF.kidney) = WKI_NoVa(ind);
```

```
        SYSTEM.Worg(ind, DEF.muscle) = WMU_NoVa(ind);
```

```
        SYSTEM.Worg(ind, DEF.skin) = WSK_NoVa(ind);
```

```
        SYSTEM.Worg(ind, DEF.thymus) = WTH_NoVa(ind);
```

```
        SYSTEM.Worg(ind, DEF.gut) = WGU_NoVa(ind);
```



```

SYSTEM.Worg(ind, DEF.spleen) = WSP_NoVa(ind);
SYSTEM.Worg(ind, DEF.pancreas) = WPA_NoVa(ind);
SYSTEM.Worg(ind, DEF.liver) = WLI_NoVa(ind);
SYSTEM.Worg(ind, DEF.lymphnode) = WLN_NoVa(ind);
SYSTEM.Worg(ind, DEF.plasma) = WBL(ind) * (1 - 0.91.*HCT_Mean(ind));
SYSTEM.Worg(ind, DEF.RBC) = WBL(ind) - SYSTEM.Worg(ind, DEF.plasma);

```

```
end
```

```
end
```

```

SYSTEM.Worg(:, DEF.remaining) = SYSTEM.Weight - ...
    SYSTEM.Worg(:, DEF.lung) - ...
    SYSTEM.Worg(:, DEF.adipose) - ...
    SYSTEM.Worg(:, DEF.bone) - ...
    SYSTEM.Worg(:, DEF.brain) - ...
    SYSTEM.Worg(:, DEF.gonads) - ...
    SYSTEM.Worg(:, DEF.heart) - ...
    SYSTEM.Worg(:, DEF.kidney) - ...
    SYSTEM.Worg(:, DEF.muscle) - ...
    SYSTEM.Worg(:, DEF.skin) - ...
    SYSTEM.Worg(:, DEF.thymus) - ...
    SYSTEM.Worg(:, DEF.gut) - ...
    SYSTEM.Worg(:, DEF.spleen) - ...
    SYSTEM.Worg(:, DEF.pancreas) - ...
    SYSTEM.Worg(:, DEF.liver) - ...
    SYSTEM.Worg(:, DEF.lymphnode) - ...
    SYSTEM.Worg(:, DEF.plasma) - ...
    SYSTEM.Worg(:, DEF.RBC);

```

```
%_Organ density (OrgDen) [kg/L]
```

```
%Organ densities are from the ICRP 1975 (Snyder) and 2002 (Valentin)
```

```
SYSTEM.OrgDen = ones(1, SYSTEM.CompNo);
```

```

SYSTEM.OrgDen(DEF.lung) = 1.0; %free of blood and air
SYSTEM.OrgDen(DEF.adipose) = 0.916;
SYSTEM.OrgDen(DEF.bone) = 1.9;
SYSTEM.OrgDen(DEF.brain) = 1.04;
SYSTEM.OrgDen(DEF.gonads) = 1.045; %combined from males and females
SYSTEM.OrgDen(DEF.heart) = 1.03;
SYSTEM.OrgDen(DEF.kidney) = 1.05;
SYSTEM.OrgDen(DEF.muscle) = 1.041;
SYSTEM.OrgDen(DEF.skin) = 1.1;
SYSTEM.OrgDen(DEF.thymus) = 1.025;
SYSTEM.OrgDen(DEF.gut) = 1.042;
SYSTEM.OrgDen(DEF.spleen) = 1.06;
SYSTEM.OrgDen(DEF.pancreas) = 1.045;
SYSTEM.OrgDen(DEF.liver) = 1.08; %Heineman et al. (1999)
SYSTEM.OrgDen(DEF.lymphnode) = 1.0; %no data available; assume 1.0
SYSTEM.OrgDen(DEF.plasma) = 1.027;
SYSTEM.OrgDen(DEF.RBC) = 1.09;

```

```
%use the same organ density for each subject
```

```
SYSTEM.OrgDen = repmat(SYSTEM.OrgDen, STUDY.IndNo, 1);
```

%use the weighted mean of all used tissues for the remaining organ

```
SYSTEM.OrgDen(:, DEF.remaining) = sum(SYSTEM.Worg.*SYSTEM.OrgDen, 2)./ ...
    sum(SYSTEM.Worg, 2);
```

%\_Organ volume (Vorg) [L]

```
SYSTEM.Vorg = SYSTEM.Worg./SYSTEM.OrgDen;
```

```
SYSTEM.Vvein = SYSTEM.Wvein./1.06;
```

```
SYSTEM.Vartery = SYSTEM.Wartery./1.06;
```

%\_Tissue composition

%Values published by Gill et al., 2016 and Jamei et al., 2009 are used

%thymus data are from rat (Rodgers & Rowland, 2005)

%gonad data are from Pierson et al., 1978, Bieri & Privali, 1965 and Diagne et al., 1983

%lymphnode data are from Zhu et al., 1996

```
SYSTEM.FraEW = ones(1, SYSTEM.CompNo); %fraction of extracellular water
SYSTEM.FraIW = ones(1, SYSTEM.CompNo); %fraction of intracellular water
SYSTEM.FraNL = ones(1, SYSTEM.CompNo); %fraction of neutral lipids
SYSTEM.FraNP = ones(1, SYSTEM.CompNo); %fraction of phospholipids
SYSTEM.AP = ones(1, SYSTEM.CompNo); %acidic phospholipids in [mg/g]
SYSTEM.KpHSA = ones(1, SYSTEM.CompNo); %partition coefficient of albumin
```

```
SYSTEM.FraEW(DEF.lung) = 0.348; SYSTEM.FraIW(DEF.lung) = 0.463;
SYSTEM.FraEW(DEF.adipose) = 0.141; SYSTEM.FraIW(DEF.adipose) = 0.039;
SYSTEM.FraEW(DEF.bone) = 0.098; SYSTEM.FraIW(DEF.bone) = 0.341;
SYSTEM.FraEW(DEF.brain) = 0.092; SYSTEM.FraIW(DEF.brain) = 0.678;
SYSTEM.FraEW(DEF.gonads) = 0.239; SYSTEM.FraIW(DEF.gonads) = 0.561;
SYSTEM.FraEW(DEF.heart) = 0.313; SYSTEM.FraIW(DEF.heart) = 0.445;
SYSTEM.FraEW(DEF.kidney) = 0.283; SYSTEM.FraIW(DEF.kidney) = 0.5;
SYSTEM.FraEW(DEF.muscle) = 0.091; SYSTEM.FraIW(DEF.muscle) = 0.669;
SYSTEM.FraEW(DEF.skin) = 0.623; SYSTEM.FraIW(DEF.skin) = 0.0947;
SYSTEM.FraEW(DEF.thymus) = 0.150; SYSTEM.FraIW(DEF.thymus) = 0.626;
SYSTEM.FraEW(DEF.gut) = 0.267; SYSTEM.FraIW(DEF.gut) = 0.451;
SYSTEM.FraEW(DEF.spleen) = 0.208; SYSTEM.FraIW(DEF.spleen) = 0.58;
SYSTEM.FraEW(DEF.pancreas) = 0.12; SYSTEM.FraIW(DEF.pancreas) = 0.664;
SYSTEM.FraEW(DEF.liver) = 0.165; SYSTEM.FraIW(DEF.liver) = 0.586;
SYSTEM.FraEW(DEF.lymphnode) = 0.208; SYSTEM.FraIW(DEF.lymphnode) = 0.58;
SYSTEM.FraEW(DEF.plasma) = 0.945; SYSTEM.FraIW(DEF.plasma) = 0;
SYSTEM.FraEW(DEF.RBC) = 0; SYSTEM.FraIW(DEF.RBC) = 0.666;
```

```
SYSTEM.FraNL(DEF.lung) = 0.003; SYSTEM.FraNP(DEF.lung) = 0.009;
SYSTEM.FraNL(DEF.adipose) = 0.79; SYSTEM.FraNP(DEF.adipose) = 0.002;
SYSTEM.FraNL(DEF.bone) = 0.074; SYSTEM.FraNP(DEF.bone) = 0.0011;
SYSTEM.FraNL(DEF.brain) = 0.051; SYSTEM.FraNP(DEF.brain) = 0.0565;
SYSTEM.FraNL(DEF.gonads) = 0.007; SYSTEM.FraNP(DEF.gonads) = 0.0077;
SYSTEM.FraNL(DEF.heart) = 0.015; SYSTEM.FraNP(DEF.heart) = 0.0166;
SYSTEM.FraNL(DEF.kidney) = 0.0207; SYSTEM.FraNP(DEF.kidney) = 0.0162;
SYSTEM.FraNL(DEF.muscle) = 0.0238; SYSTEM.FraNP(DEF.muscle) = 0.0072;
SYSTEM.FraNL(DEF.skin) = 0.0248; SYSTEM.FraNP(DEF.skin) = 0.0111;
SYSTEM.FraNL(DEF.thymus) = 0.017; SYSTEM.FraNP(DEF.thymus) = 0.0092;
SYSTEM.FraNL(DEF.gut) = 0.0487; SYSTEM.FraNP(DEF.gut) = 0.0163;
```

```

SYSTEM.FraNL(DEF.spleen)      = 0.0201;    SYSTEM.FraNP(DEF.spleen)      = 0.0198;
SYSTEM.FraNL(DEF.pancreas)    = 0.041;     SYSTEM.FraNP(DEF.pancreas)    = 0.0093;
SYSTEM.FraNL(DEF.liver)       = 0.0348;    SYSTEM.FraNP(DEF.liver)       = 0.0252;
SYSTEM.FraNL(DEF.lymphnode)   = 0.0201;    SYSTEM.FraNP(DEF.lymphnode)   = 0.0198;
SYSTEM.FraNL(DEF.plasma)      = 0.35;     SYSTEM.FraNP(DEF.plasma)      = 0.225;
SYSTEM.FraNL(DEF.RBC)         = 0.17;     SYSTEM.FraNP(DEF.RBC)         = 0.29;

```

```

SYSTEM.AP(DEF.lung)           = 0.5;       SYSTEM.KpHSA(DEF.lung)        = 0.212;
SYSTEM.AP(DEF.adipose)        = 0.4;       SYSTEM.KpHSA(DEF.adipose)     = 0.021;
SYSTEM.AP(DEF.bone)           = 0.67;      SYSTEM.KpHSA(DEF.bone)        = 0.1;
SYSTEM.AP(DEF.brain)          = 0.4;       SYSTEM.KpHSA(DEF.brain)       = 0.048;
SYSTEM.AP(DEF.gonads)         = 1.23;      SYSTEM.KpHSA(DEF.gonads)      = 0.048;
SYSTEM.AP(DEF.heart)          = 3.07;      SYSTEM.KpHSA(DEF.heart)       = 0.157;
SYSTEM.AP(DEF.kidney)         = 2.48;      SYSTEM.KpHSA(DEF.kidney)      = 0.13;
SYSTEM.AP(DEF.muscle)         = 2.49;      SYSTEM.KpHSA(DEF.muscle)      = 0.025;
SYSTEM.AP(DEF.skin)           = 1.32;      SYSTEM.KpHSA(DEF.skin)        = 0.277;
SYSTEM.AP(DEF.thymus)         = 2.3;       SYSTEM.KpHSA(DEF.thymus)      = 0.075;
SYSTEM.AP(DEF.gut)            = 2.84;      SYSTEM.KpHSA(DEF.gut)         = 0.158;
SYSTEM.AP(DEF.spleen)         = 2.81;      SYSTEM.KpHSA(DEF.spleen)      = 0.097;
SYSTEM.AP(DEF.pancreas)       = 1.67;      SYSTEM.KpHSA(DEF.pancreas)    = 0.06;
SYSTEM.AP(DEF.liver)          = 5.09;      SYSTEM.KpHSA(DEF.liver)       = 0.086;
SYSTEM.AP(DEF.lymphnode)      = 2.81;      SYSTEM.KpHSA(DEF.lymphnode)   = 0.097;
SYSTEM.AP(DEF.plasma)         = 0.04;      SYSTEM.KpHSA(DEF.plasma)      = 1.0;
SYSTEM.AP(DEF.RBC)            = 0.44;      SYSTEM.KpHSA(DEF.RBC)         = 0.0;

```

%KpALB does not change with age (Yan et al., 1968)

%there is no variability of tissue composition parameters

```

SYSTEM.FraEW = repmat(SYSTEM.FraEW, STUDY.IndNo, 1);
SYSTEM.FraIW = repmat(SYSTEM.FraIW, STUDY.IndNo, 1);
SYSTEM.FraNL = repmat(SYSTEM.FraNL, STUDY.IndNo, 1);
SYSTEM.FraNP = repmat(SYSTEM.FraNP, STUDY.IndNo, 1);
SYSTEM.AP    = repmat(SYSTEM.AP, STUDY.IndNo, 1);
SYSTEM.KpHSA = repmat(SYSTEM.KpHSA, STUDY.IndNo, 1);

```

%remaining organ will always be the weighted mean

```

SYSTEM.FraEW(:, DEF.remaining) = sum(SYSTEM.Worg.*SYSTEM.FraEW, 2)./sum(SYSTEM.Worg, 2);
SYSTEM.FraIW(:, DEF.remaining) = sum(SYSTEM.Worg.*SYSTEM.FraIW, 2)./sum(SYSTEM.Worg, 2);
SYSTEM.FraNL(:, DEF.remaining) = sum(SYSTEM.Worg.*SYSTEM.FraNL, 2)./sum(SYSTEM.Worg, 2);
SYSTEM.FraNP(:, DEF.remaining) = sum(SYSTEM.Worg.*SYSTEM.FraNP, 2)./sum(SYSTEM.Worg, 2);
SYSTEM.AP(:, DEF.remaining)     = sum(SYSTEM.Worg.*SYSTEM.AP, 2)./sum(SYSTEM.Worg, 2);
SYSTEM.KpHSA(:, DEF.remaining)  = sum(SYSTEM.Worg.*SYSTEM.KpHSA, 2)./sum(SYSTEM.Worg, 2);

```

%\_Subcompartment volume [L]

```

%% fraction of vascular space of each tissue %%%%%%%%%%%%%%%%%%%%%%%%%%%%%%%%%%%%%%%%%%%%%%%%%%%%%%%%%%%%%%%%%%%%%%%%%
%values are from Gill et al., 2016
%thymus is from Shah and Betts, 2012
%gonads is calculated from the Vint (Valentin, 2002)

```

```

SYSTEM.FraVas = ones(STUDY.IndNo, SYSTEM.CompNo);

SYSTEM.FraVas(:, DEF.lung)      = 0.185*ones(STUDY.IndNo, 1);
SYSTEM.FraVas(:, DEF.adipose)   = 0.031*ones(STUDY.IndNo, 1);
SYSTEM.FraVas(:, DEF.bone)      = 0.05*ones(STUDY.IndNo, 1);
SYSTEM.FraVas(:, DEF.brain)     = -0.000545 .* Age + 0.056;
SYSTEM.FraVas(:, DEF.gonads)    = 0.069*ones(STUDY.IndNo, 1);
SYSTEM.FraVas(:, DEF.heart)     = 0.042*ones(STUDY.IndNo, 1);
SYSTEM.FraVas(:, DEF.kidney)    = 0.07*ones(STUDY.IndNo, 1);
SYSTEM.FraVas(:, DEF.muscle)    = 0.027*ones(STUDY.IndNo, 1);
SYSTEM.FraVas(:, DEF.skin)      = 0.05*ones(STUDY.IndNo, 1);
SYSTEM.FraVas(:, DEF.thymus)    = 0.05*ones(STUDY.IndNo, 1);
SYSTEM.FraVas(:, DEF.gut)       = 0.05*ones(STUDY.IndNo, 1);
SYSTEM.FraVas(:, DEF.spleen)    = 0.05*ones(STUDY.IndNo, 1);
SYSTEM.FraVas(:, DEF.pancreas)  = 0.05*ones(STUDY.IndNo, 1);
SYSTEM.FraVas(:, DEF.liver)     = 0.05*ones(STUDY.IndNo, 1);
SYSTEM.FraVas(:, DEF.lymphnode) = 0.05*ones(STUDY.IndNo, 1);
SYSTEM.FraVas(:, DEF.plasma)    = ones(STUDY.IndNo, 1);
SYSTEM.FraVas(:, DEF.RBC)       = ones(STUDY.IndNo, 1);

%weighted mean for the remaining organ
SYSTEM.FraVas(:, DEF.remaining) = sum(SYSTEM.Worg.*SYSTEM.FraVas, 2) ./ ...
    sum(SYSTEM.Worg, 2);

SYSTEM.Vvas = SYSTEM.FraVas.*SYSTEM.Vorg;
SYSTEM.Vint = (SYSTEM.Vorg.*SYSTEM.FraEW) - (SYSTEM.Vvas.*(1 - SYSTEM.HCT));
SYSTEM.Vcel = SYSTEM.Vorg - SYSTEM.Vvas - SYSTEM.Vint;

%_pH of the each organ_____
%values are from Schmitt, 2008
SYSTEM.pH = zeros(1, SYSTEM.OrgNo);

SYSTEM.pH(DEF.lung)      = 6.6;
SYSTEM.pH(DEF.adipose)   = 7.1;
SYSTEM.pH(DEF.bone)      = 7.0;
SYSTEM.pH(DEF.brain)     = 7.1;
SYSTEM.pH(DEF.gonads)    = 7.0;
SYSTEM.pH(DEF.heart)     = 7.1;
SYSTEM.pH(DEF.kidney)    = 7.22;
SYSTEM.pH(DEF.muscle)    = 7.0;
SYSTEM.pH(DEF.skin)      = 7.0;
SYSTEM.pH(DEF.thymus)    = 7.0; %no data; take global value of Rodgers % Rowland, ↵
2005
SYSTEM.pH(DEF.gut)       = 7.0;
SYSTEM.pH(DEF.spleen)    = 7.0;
SYSTEM.pH(DEF.pancreas)  = 7.0; %no data; take global value of Rodgers % Rowland, ↵
2005
SYSTEM.pH(DEF.liver)     = 7.23;
SYSTEM.pH(DEF.lymphnode) = 7.0;
SYSTEM.pH(DEF.plasma)    = 7.4; %Valentin, 2002
SYSTEM.pH(DEF.RBC)       = 7.21; %Waddell, 1969
SYSTEM.pH(DEF.remaining) = 7.0; %no data; take global value of Rodgers % Rowland, ↵
2005

```

```

%_blood flows [L/h]
%data are from Stader et al., 2018
FraQorg = zeros(STUDY.IndNo, SYSTEM.OrgNo);
SYSTEM.Qorg = zeros(STUDY.IndNo, SYSTEM.OrgNo);

%% Cardiac output (CO) %%%%%%%%%%%%%%%%%%%%%%%%%%%%%%%%%%%%%%%%%%%%%%%%%%%%%%%%%%%%%%%%%%%%%%%%%
CO_Mean = 159.*SYSTEM.BSA - 1.56.*Age + 114;

CO = normrnd(CO_Mean, (21.1/100).*CO_Mean);

%% regional blood flows - fraction of CO %%%%%%%%%%%%%%%%%%%%%%%%%%%%%%%%%%%%%%%%%%%%%%%%%%%%%%%%%%%%%%%%%%%%%%%%%
FraQorg(:, DEF.lung) = 100*ones(STUDY.IndNo, 1);

FraQorg(:, DEF.adipose) = (0.044 + 0.027.*Sex) .* Age + 2.4.*Sex + 3.9;

FraQorg(:, DEF.bone) = 5*ones(STUDY.IndNo, 1);

FraQorg(:, DEF.brain) = exp(-0.48.*SYSTEM.BSA + 0.04.*Sex + 3.5);

FraQorg(:, DEF.gonads) = -0.03.*Sex + 0.05;

FraQorg(:, DEF.heart) = 4 + 1.*Sex;

FraQorg(:, DEF.kidney) = -8.7.*SYSTEM.BSA + 0.29.*SYSTEM.Height - ...
    0.081.*Age - 13;

FraQorg(:, DEF.muscle) = -6.4.*Sex + 17.5;

FraQorg(:, DEF.skin) = 5*ones(STUDY.IndNo, 1);

FraQorg(:, DEF.thymus) = 1.5*ones(STUDY.IndNo, 1);

FraQorg(:, DEF.liver) = -0.108.*Age + 1.04.*Sex + 27.9;

%hepatic arterial blood flow appears to be independent of age
FraQHA = 6.5*ones(STUDY.IndNo, 1);
FraQPV = FraQorg(:, DEF.liver) - FraQHA;

%values of gut, spleen and pancreas are scaled via hepatic blood flow from ICRP
FraQorg(:, DEF.gut) = ((2.*Sex + 14).*FraQPV)./(1.5.*Sex + 19);
FraQorg(:, DEF.spleen) = (3.*FraQPV)./(1.5.*Sex + 19);
FraQorg(:, DEF.pancreas) = (1.*FraQPV)./(1.5.*Sex + 19);

%blood flow bypassing the portal vein organs gut, spleen and pancreas
FraQBY = FraQPV - ...
    FraQorg(:, DEF.gut) - ...
    FraQorg(:, DEF.spleen) - ...
    FraQorg(:, DEF.pancreas);

FraQorg(:, DEF.lymphnode) = 1.65*ones(STUDY.IndNo, 1);

FraQorg(:, DEF.remaining) = FraQorg(:, DEF.lung) - ...

```

```

FraQorg(:, DEF.adipose) - ...
FraQorg(:, DEF.bone) - ...
FraQorg(:, DEF.gonads) - ...
FraQorg(:, DEF.heart) - ...
FraQorg(:, DEF.kidney) - ...
FraQorg(:, DEF.muscle) - ...
FraQorg(:, DEF.skin) - ...
FraQorg(:, DEF.thymus) - ...
FraQorg(:, DEF.liver) - ...
FraQorg(:, DEF.lymphnode);

```

```
%divide the fraction of blood flows by 100
```

```
FraQorg = FraQorg./100;
```

```
%% regional blood flows %%%%%%%%%%%%%%%%%%%%%%%%%%%%%%%%%%%%%%%%%%%%%%%%%%%%%%%%%%%%%%%%%%%%%%%%%%
```

```
SYSTEM.Qorg = FraQorg.*CO;
```

```
SYSTEM.QHA = (FraQHA./100).*CO;
```

```
SYSTEM.QBY = (FraQBY./100).*CO;
```

```
%_lymph flows in [L/h]
```

```
%data are from Gill et al., 2016
```

```
%% total lymph flow %%%%%%%%%%%%%%%%%%%%%%%%%%%%%%%%%%%%%%%%%%%%%%%%%%%%%%%%%%%%%%%%%%%%%%%%%%
```

```
LT = 0.00386.*SYSTEM.Weight;
```

```
SYSTEM.TotLymphFlow = normrnd(LT, (30/100).*LT);
```

```
%% fraction of regional lymph flows %%%%%%%%%%%%%%%%%%%%%%%%%%%%%%%%%%%%%%%%%%%%%%%%%%%%%%%%%%%%%%%%%%%%%%%%%%
```

```
FraLorg = zeros(1, SYSTEM.OrgNo);
```

```
FraLorg(DEF.lung) = 0.03;
```

```
FraLorg(DEF.adipose) = 0.128;
```

```
FraLorg(DEF.bone) = 0;
```

```
FraLorg(DEF.brain) = 0.0105;
```

```
FraLorg(DEF.gonads) = 0.013;
```

```
FraLorg(DEF.heart) = 0.01;
```

```
FraLorg(DEF.kidney) = 0.085;
```

```
FraLorg(DEF.muscle) = 0.16;
```

```
FraLorg(DEF.skin) = 0.073;
```

```
FraLorg(DEF.thymus) = 0.011;
```

```
FraLorg(DEF.gut) = 0.12;
```

```
FraLorg(DEF.spleen) = 0;
```

```
FraLorg(DEF.pancreas) = 0.003;
```

```
FraLorg(DEF.liver) = 0.33;
```

```
FraLorg(DEF.lymphnode) = 0;
```

```
%it is assumed that the fraction of lymph flow is similar for all individuals
```

```
FraLorg = repmat(FraLorg, STUDY.IndNo, 1);
```

```
%the remainig organ get the rest of the lymph flow
```

```
FraLorg(:, DEF.remaining) = 1 - ...
```

```
FraLorg(:, DEF.lung) - ...
```

```
FraLorg(:, DEF.adipose) - ...
```

```

FraLorg(:, DEF.bone) - ...
FraLorg(:, DEF.brain) - ...
FraLorg(:, DEF.gonads) - ...
FraLorg(:, DEF.heart) - ...
FraLorg(:, DEF.kidney) - ...
FraLorg(:, DEF.muscle) - ...
FraLorg(:, DEF.skin) - ...
FraLorg(:, DEF.thymus) - ...
FraLorg(:, DEF.gut) - ...
FraLorg(:, DEF.spleen) - ...
FraLorg(:, DEF.pancreas) - ...
FraLorg(:, DEF.liver);

```

```
%calculate the lymph flow
```

```
SYSTEM.Lorg = SYSTEM.TotLymphFlow.*FraLorg;
```

```
%_liver parameters
```

```
%% MPPGL %%%%%%%%%%%%%%%%%%%%%%%%%%%%%%%%%%%%%%%%%%%%%%%%%%%%%%%%%%%%%%%%%%%%%%%%%%
```

```
%MPPGL = microsomal protein per gram liver in [mg / g liver]
```

```
%Barter et al., 2008
```

```
MPPGL_Mean = 10.^(0.0000024.*Age.^3 - 0.00038.*Age.^2 + 0.0158.*Age + 1.407);
```

```
MPPGL_CV = 46;
```

```
MPPGL_Min = [10, 10];
```

```
MPPGL_Max = [110, 110];
```

```
SYSTEM.MPPGL = Calc_SysPar(MPPGL_Mean, MPPGL_CV, MPPGL_Min, MPPGL_Max);
```

```
%_hepatic CYP enzyme abundance [pmol/mg]
```

```
%hepatic CYP abundance is from Achour et al., 2014
```

```
CYP2D6_Mean = 12.6*ones(STUDY.IndNo, 1);
```

```
CYP2D6_CV = 74;
```

```
CYP2D6_Min = [4.2, 4.2];
```

```
CYP2D6_Max = [38, 38];
```

```
CYP2J2_Mean = 1.2*ones(STUDY.IndNo, 1);
```

```
CYP2J2_CV = 58;
```

```
CYP2J2_Min = [0.4, 0.4];
```

```
CYP2J2_Max = [3.6, 3.6];
```

```
CYP3A4_Mean = 93.0*ones(STUDY.IndNo, 1);
```

```
CYP3A4_CV = 81;
```

```
CYP3A4_Min = [18.6, 18.6];
```

```
CYP3A4_Max = [601 601];
```

```
%AhC = Abundance of hepatic CYP enzymes
```

```
AhC(:, DEF.CYP2D6) = Calc_SysPar(CYP2D6_Mean, CYP2D6_CV, CYP2D6_Min, CYP2D6_Max);
```

```
AhC(:, DEF.CYP3A4) = Calc_SysPar(CYP3A4_Mean, CYP3A4_CV, CYP3A4_Min, CYP3A4_Max);
```

```
AhC(:, DEF.CYP3A5) = 0.41.*AhC(:, DEF.CYP3A4) + 56.1;
```

```
AhC(:, DEF.CYP2J2) = Calc_SysPar(CYP2J2_Mean, CYP2J2_CV, CYP2J2_Min, CYP2J2_Max);
```

```
SYSTEM.CYPhe_AB = AhC.*PheCYP;
```

```

%degradation rate of hepatic CYP enzymes in [1/h]
SYSTEM.CYPhe_kdeg = zeros(1, SYSTEM.CYPliNo);

SYSTEM.CYPhe_kdeg(DEF.CYP2D6) = 0.0143;
SYSTEM.CYPhe_kdeg(DEF.CYP3A4) = 0.0077;
SYSTEM.CYPhe_kdeg(DEF.CYP3A5) = 0.0193;
SYSTEM.CYPhe_kdeg(DEF.CYP2J2) = 0.01;

SYSTEM.CYPhe_kdeg = repmat(SYSTEM.CYPhe_kdeg, STUDY.IndNo, 1);

%_kidney parameters_____
%% glomerular filtration rate (GFR) in [mL/min] %%%%%%%%%%%
GFR = exp(-0.0079.*Age + 0.5.*SYSTEM.BSA + 4.2);

SYSTEM.GFR = normrnd(GFR, (14.7/100).*GFR);

%_parameters of the GI tract_____
%% Volumes of intestinal segments %%%%%%%%%%%
%total volume of intestinal segments in [L]
%division of the intestinal volume to different segments is given in the ICRP
SYSTEM.VsegCAT = zeros(STUDY.IndNo, SYSTEM.SegNo);

SYSTEM.VsegCAT(:, DEF.stomach) = 0.153 .* SYSTEM.Vorg(:, DEF.gut);
SYSTEM.VsegCAT(:, DEF.duodenum) = 0.060 .* SYSTEM.Vorg(:, DEF.gut);
SYSTEM.VsegCAT(:, DEF.jejunum) = 0.279 .* SYSTEM.Vorg(:, DEF.gut);
SYSTEM.VsegCAT(:, DEF.ileum) = 0.316 .* SYSTEM.Vorg(:, DEF.gut);
SYSTEM.VsegCAT(:, DEF.colon) = 0.192 .* SYSTEM.Vorg(:, DEF.gut);

%vascular space of the gut in [L]
%Gill et al. (2016) report a fraction of 0.05 for the gut
SYSTEM.VvasCAT = zeros(STUDY.IndNo, SYSTEM.SegNo);

SYSTEM.VvasCAT(:, DEF.duodenum) = 0.05 .* SYSTEM.VsegCAT(:, DEF.duodenum);
SYSTEM.VvasCAT(:, DEF.jejunum) = 0.05 .* SYSTEM.VsegCAT(:, DEF.jejunum);
SYSTEM.VvasCAT(:, DEF.ileum) = 0.05 .* SYSTEM.VsegCAT(:, DEF.ileum);
SYSTEM.VvasCAT(:, DEF.colon) = 0.05 .* SYSTEM.VsegCAT(:, DEF.colon);

SYSTEM.Vvas(:, DEF.gut) = sum(SYSTEM.VvasCAT, 2);

%interstitial space of the gut in [L]
SYSTEM.VintCAT = SYSTEM.FraEW(:, DEF.gut) .* SYSTEM.VsegCAT - SYSTEM.VvasCAT;

%the stomach is not modelled with interstitial space
SYSTEM.VintCAT(:, DEF.stomach) = 0;

SYSTEM.Vint(:, DEF.gut) = sum(SYSTEM.VintCAT, 2);

%% Length of the intestine in [cm] %%%%%%%%%%%
%length are from the ICRP (Valentin, 2002)
SYSTEM.LengthGU = zeros(STUDY.IndNo, SYSTEM.SegNo);

SYSTEM.LengthGU(:, DEF.duodenum) = 0.091 .* (1.6.*SYSTEM.Height);
SYSTEM.LengthGU(:, DEF.jejunum) = 0.426 .* (1.6.*SYSTEM.Height);

```



```
SYSTEM.LengthGU(:, DEF.ileum) = 0.483 .* (1.6.*SYSTEM.Height);
SYSTEM.LengthGU(:, DEF.colon) = 0.52 .* SYSTEM.Height + 18.5;
```

```
%% Radius of the intestine in [cm] %%%%%%%%%%%%%%%%%%%%%%%%%%%%%%%%%%%%%%%%%%%%%%%%%%%%%%%%%%%%%%%%%%%%%%%%%%
%it is assumed that the intestine is a cylinder
%1000 converts L to cm3
```

```
SYSTEM.RadiusGU = sqrt((SYSTEM.VsegCAT .* 1000) ./ (pi .* SYSTEM.LengthGU));
```

```
%% Surface of the intestine in [cm2] %%%%%%%%%%%%%%%%%%%%%%%%%%%%%%%%%%%%%%%%%%%%%%%%%%%%%%%%%%%%%%%%%%%%%%%%%%
SurfaceGU = 2 .* pi .* SYSTEM.RadiusGU .* SYSTEM.LengthGU;
```

```
%the intestinal surface is enlarged by plicae circulares, villi and microvilli
%data from Helander & Fändriks, 2014
```

```
FPC = zeros(1, SYSTEM.SegNo); %factor for plicae circulares
FVI = zeros(1, SYSTEM.SegNo); %factor for villi
FMV = zeros(1, SYSTEM.SegNo); %factor for microvilli
```

```
FPC(DEF.duodenum) = 1.6; FVI(DEF.duodenum) = 6.5; FMV(DEF.duodenum) = 14.6;
FPC(DEF.jejunum) = 1.6; FVI(DEF.jejunum) = 8.6; FMV(DEF.jejunum) = 9.2;
FPC(DEF.ileum) = 1.6; FVI(DEF.ileum) = 4.5; FMV(DEF.ileum) = 15.7;
FPC(DEF.colon) = 1.0; FVI(DEF.colon) = 6.5; FMV(DEF.colon) = 1.0;
```

```
FPC = repmat(FPC, STUDY.IndNo, 1);
FVI = repmat(FVI, STUDY.IndNo, 1);
FMV = repmat(FMV, STUDY.IndNo, 1);
```

```
SYSTEM.PSA = SurfaceGU.*FPC.*FVI.*FMV;
```

```
%% enterocyte space of the gut in [L] %%%%%%%%%%%%%%%%%%%%%%%%%%%%%%%%%%%%%%%%%%%%%%%%%%%%%%%%%%%%%%%%%%%%%%%%%%
SYSTEM.VentCAT = (3040 .* (SurfaceGU ./ 0.0001)) .* 770 .* 1E-15;
```

```
%stomach does not have enterocytes
SYSTEM.VentCAT(:, DEF.stomach) = 0;
```

```
%luminal space of the gut in [L]
SYSTEM.VlumCAT = SYSTEM.VsegCAT - SYSTEM.VvasCAT - SYSTEM.VintCAT - ...
SYSTEM.VentCAT;
```

```
%% intestinal transit times [h] %%%%%%%%%%%%%%%%%%%%%%%%%%%%%%%%%%%%%%%%%%%%%%%%%%%%%%%%%%%%%%%%%%%%%%%%%%
%uniform distribution between 0.25 (Yu & Amidon 1999) and 0.4 (Jamei et al. 2009)
%for the gastric emptying time (GET) - for liquids only
GET = 0.25 + (0.40 - 0.25)*rand(STUDY.IndNo, 1);
```

```
SIT_Mean = 3.4*ones(STUDY.IndNo, 1);
SIT_CV = 40.2;
SIT_Min = [0.5, 0.5];
SIT_Max = [9.5, 9.5];
SIT = Calc_SysPar(SIT_Mean, SIT_CV, SIT_Min, SIT_Max);
```

```
CNT_Mean = 17.2*ones(STUDY.IndNo, 1);
CNT_CV = 20.0;
CNT_Min = [17.2/5, 17.2/5];
CNT_Max = [17.2*5, 17.2*5];
```

```
CNT = Calc_SysPar(CNT_Mean, CNT_CV, CNT_Min, CNT_Max);
```

```
%separation into different segments is based on length (Darwich et al., 2010)
SYSTEM.TransitT = zeros(STUDY.IndNo, SYSTEM.SegNo);
```

```
SYSTEM.TransitT(:, DEF.stomach) = GET;
SYSTEM.TransitT(:, DEF.duodenum) = SIT.*0.091;
SYSTEM.TransitT(:, DEF.jejunum) = SIT.*0.426;
SYSTEM.TransitT(:, DEF.ileum) = SIT.*0.483;
SYSTEM.TransitT(:, DEF.colon) = CNT;
```

```
%_intestinal CYP enzymes
```

```
%minimum / maximum is an arbitrary 3-fold difference
```

```
CYP2D6_Mean = 0.8*ones(STUDY.IndNo, 1);
CYP2D6_CV = 60;
CYP2D6_Min = [0.8/3, 0.8/3];
CYP2D6_Max = [0.8*3, 0.8*3];
```

```
CYP3A4_Mean = 66.2*ones(STUDY.IndNo, 1);
CYP3A4_CV = 60;
CYP3A4_Min = [66.3/3, 66.3/3];
CYP3A4_Max = [66.3*3, 66.3*3];
```

```
CYP3A5_Mean = 24.6*ones(STUDY.IndNo, 1);
CYP3A5_CV = 60;
CYP3A5_Min = [24.6/3, 24.6/3];
CYP3A5_Max = [24.6*3, 24.6*3];
```

```
%AiC = Abundance of intestinal CYP enzymes
```

```
AiC(:, DEF.CYP2D6) = Calc_SysPar(CYP2D6_Mean, CYP2D6_CV, CYP2D6_Min, CYP2D6_Max);
AiC(:, DEF.CYP3A4) = Calc_SysPar(CYP3A4_Mean, CYP3A4_CV, CYP3A4_Min, CYP3A4_Max);
AiC(:, DEF.CYP3A5) = Calc_SysPar(CYP3A5_Mean, CYP3A5_CV, CYP3A5_Min, CYP3A5_Max);
```

```
%intestinal CYP abundance [nmol]
```

```
CYPin_AB = AiC .* PheCYP(:, 1:SYSTEM.CYPinNo);
```

```
%separation into different segments is done according to Paine et al., 1997
```

```
SYSTEM.CYPseg_AB = zeros(STUDY.IndNo, SYSTEM.CYPinNo, SYSTEM.SegNo);
SYSTEM.CYPseg_AB(:, :, DEF.duodenum) = 0.136.*CYPin_AB;
SYSTEM.CYPseg_AB(:, :, DEF.jejunum) = 0.544.*CYPin_AB;
SYSTEM.CYPseg_AB(:, :, DEF.ileum) = 0.320.*CYPin_AB;
```

```
%degradation rate of intestinal CYP enzymes in [1/h]
```

```
SYSTEM.CYPin_kdeg = 0.03.*ones(STUDY.IndNo, SYSTEM.CYPinNo);
```

```
%=====
%% USED FUNCTION %%%%%%%%%%%
%=====
```

```
function SysPar = Calc_SysPar(Mean, CV, Min, Max)
```

```
%read gender differences
```

```
MinMale = Min(1); MinFemale = Min(2);
MaxMale = Max(1); MaxFemale = Max(2);
```

```
%generate parameter
SysPar = normrnd(Mean, (CV/100).*Mean);

%truncate parameter at minimum and maximum observed values
for sub = 1:STUDY.IndNo
    if SYSTEM.Sex(sub) == 1
        if SysPar(sub) < MinFemale || SysPar(sub) > MaxFemale
            SysPar(sub) = normrnd(Mean(sub), (CV/1000).*Mean(sub));
        end
    else
        if SysPar(sub) < MinMale || SysPar(sub) > MaxMale
            SysPar(sub) = normrnd(Mean(sub), (CV/1000).*Mean(sub));
        end
    end
end
end
end

%=====
%% USED REFERENCES %%%%%%%%%%%
%=====
% Stader F, Siccardi M, Battegay M, Kinvig H, Penny MA, & Marzolini C. Repository
describing an aging population to inform physiologically based pharmacokinetic
models considering anatomical, physiological, and biological age-dependent changes.
Clinical Pharmacokinetics, 2018. [Epub ahead of print].
% Gill KL, Gardner I, Li L, & Jamei M. A bottom-up whole-body physiologically based
pharmacokinetic model to mechanistically predict tissue distribution and the rate
of subcutaneous absorption of therapeutic proteins. The AAPS Journal, 2016. 18(1):
156-170.
% Valentin J. Basic anatomical and physiological data for use in radiological
protection: reference values: ICRP Publication 89. Annals of the ICRP, 2002. 32(3):
1-277.
% Snyder W, Cook M, Nasset E, Karhausen L, Howells GP, & Tipton I, Report of the
Task Group on Reference Man. 1975, Oxford (UK): Pergamon Press.
% Heinemann A, Wischhusen F, Püschel K, & Rogiers X. Standard liver volume in the
Caucasian population. Liver Transplantation and Surgery, 1999. 5(5): 366-368.
% Jamei M, Dickinson GL, & Rostami-Hodjegan A. A framework for assessing inter-
individual variability in pharmacokinetics using virtual human populations and
integrating general knowledge of physical chemistry, biology, anatomy, physiology
and genetics: a tale of 'bottom-up'vs 'top-down'recognition of covariates. Drug
Metabolism and Pharmacokinetics, 2009. 24(1): 53-75.
% Rodgers T, Leahy D, & Rowland M. Tissue distribution of basic drugs: Accounting
for enantiomeric, compound and regional differences amongst blocking drugs in
rat. Journal of Pharmaceutical Sciences, 2005. 94(6): 1237-1248.
% Pierson R, Price DC, Wang J, & Jain RK. Extracellular water measurements: organ
tracer kinetics of bromide and sucrose in rats and man. American Journal of
Physiology-Renal Physiology, 1978. 235(3): F254-F264.
% Bieri J & Prival E. Lipid composition of testes from various species. Comparative
Biochemistry and Physiology, 1965. 15(3): 275-282.
% Diagne A, Fauvel J, Record M, Chap H, & Douste-Blazy L. Studies on ether
```

phospholipids: II. Comparative composition of various tissues from human, rat and guinea pig. *Biochimica et Biophysica Acta*, 1984. 793(2): 221-231.

% Zhu H, Melder RJ, Baxter LT, & Jain RK. Physiologically based kinetic model of effector cell biodistribution in mammals: implications for adoptive immunotherapy. *Cancer Research*, 1996. 56(16): 3771-3781.

% Yan SH & Franks J. Albumin metabolism in elderly men and women. *The Journal of Laboratory and Clinical Medicine*, 1968. 72(3): 449-454.

% Shah DK & Betts AM. Towards a platform PBPK model to characterize the plasma and tissue disposition of monoclonal antibodies in preclinical species and human. *Journal of Pharmacokinetics and Pharmacodynamics*, 2012. 39(1): 67-86.

% Schmitt W. General approach for the calculation of tissue to plasma partition coefficients. *Toxicology in Vitro*, 2008. 22(2): 457-467.

% Waddell WJ & Bates RG. Intracellular pH. *Physiological Reviews*, 1969. 49(2): 285-329.

% Barter ZE, Chowdry JE, Harlow JR, Snawder JE, Lipscomb JC, & Rostami-Hodjegan A. Covariation of human microsomal protein per gram of liver with age: absence of influence of operator and sample storage may justify interlaboratory data pooling. *Drug Metabolism and Disposition*, 2008. 36(12): 2405-2409.

% Achour B, Barber J, & Rostami-Hodjegan A. Expression of hepatic drug-metabolizing cytochrome p450 enzymes and their intercorrelations: a meta-analysis. *Drug Metabolism and Disposition*, 2014. 42(8): 1349-1356.

% Helander HF & Fändriks L. Surface area of the digestive tract-revisited. *Scandinavian Journal of Gastroenterology*, 2014. 49(6): 681-689.

% Yu LX & Amidon GL. A compartmental absorption and transit model for estimating oral drug absorption. *International Journal of Pharmaceutics*, 1999. 186(2): 119-125.

% Darwich A, Neuhoff S, Jamei M, & Rostami-Hodjegan A. Interplay of metabolism and transport in determining oral drug absorption and gut wall metabolism: a simulation assessment using the "Advanced Dissolution, Absorption, Metabolism (ADAM)" model. *Current Drug Metabolism*, 2010. 11(9): 716-729.

% Jamei M, Turner D, Yang J, Neuhoff S, Polak S, Rostami-Hodjegan A, & Tucker G. Population-based mechanistic prediction of oral drug absorption. *The AAPS Journal*, 2009. 11(2): 225-237.

% Paine MF, Khalighi M, Fisher JM, Shen DD, Kunze KL, Marsh CL, Perkins JD, & Thummel KE. Characterization of interintestinal and intrainestinal variations in human CYP3A-dependent metabolism. *Journal of Pharmacology and Experimental Therapeutics*, 1997. 283(3): 1552-1562.

```
function[] = Drug()
%This function loads the relevant drug files from the drug file library and
%performs the in vitro-to-in vivo extrapolation

global DEF          %global DEF defines model parameters
global SYSTEM      %global SYSTEM defines system parameters
global DRUG        %global DRUG defines drug parameters
global DDI         %global DDI enhances drug parameters for DDI prediction
global STUDY       %global STUDY defines study design parameters
global MODEL       %global MODEL defines parameters important for modeling

%define variables used in the script
dru = 5;

%__PreProcessing__
%prepare all drug parameters for each drug file in the library

%% physchem characteristics %%%%%%%%%%%%%%%%%%%%%%%%%%%%%%%%%%%%%%%%%%%%%%%%%%%%%%%%%%%%%%%%%%%%%%%%%%
DRUG.MolW          = zeros(1, DEF.DrugLibNo);    %molecular weight in [g/mol]
DRUG.logP          = zeros(1, DEF.DrugLibNo);    %octanol water partition coef
DRUG.pKa          = zeros(1, DEF.DrugLibNo);
DRUG.BP           = zeros(1, DEF.DrugLibNo);    %blood-to-plasma ratio
DRUG.fu           = zeros(1, DEF.DrugLibNo);    %fraction unbound
DRUG.protein      = zeros(1, DEF.DrugLibNo);    %main binding protein

%% absorption %%%%%%%%%%%%%%%%%%%%%%%%%%%%%%%%%%%%%%%%%%%%%%%%%%%%%%%%%%%%%%%%%%%%%%%%%%
%apparent permeability in 10^-6 cm/sec
DRUG.Papp         = zeros(1, DEF.DrugLibNo);

%a rate constant can be introduced to match the observed Tmax
DRUG.LagRate      = zeros(1, DEF.DrugLibNo);

%% distribution %%%%%%%%%%%%%%%%%%%%%%%%%%%%%%%%%%%%%%%%%%%%%%%%%%%%%%%%%%%%%%%%%%%%%%%%%%
%universal KP Scalar for all compartments at once
DRUG.KpScalarAll = zeros(1, DEF.DrugLibNo);

%Kp scalar for single compartments
DRUG.KpScalar     = zeros(SYSTEM.CompNo, DEF.DrugLibNo);

%% metabolism & elimination %%%%%%%%%%%%%%%%%%%%%%%%%%%%%%%%%%%%%%%%%%%%%%%%%%%%%%%%%%%%%%%%%%%%%%%%%%
DRUG.Vmax_CYP     = zeros(SYSTEM.CYPliNo, DEF.DrugLibNo);
DRUG.Km_CYP       = zeros(SYSTEM.CYPliNo, DEF.DrugLibNo);
DRUG.CLint_CYP    = zeros(SYSTEM.CYPliNo, DEF.DrugLibNo);

DRUG.CLint        = zeros(1, DEF.DrugLibNo);

DRUG.CLrenal      = zeros(1, DEF.DrugLibNo);
DRUG.CLrenalCV    = zeros(1, DEF.DrugLibNo);

DRUG.CLbile       = zeros(1, DEF.DrugLibNo);
DRUG.CLbileCV     = zeros(1, DEF.DrugLibNo);

DRUG.CLadditional = zeros(1, DEF.DrugLibNo);
```

```
DRUG.CLadditionalCV = zeros(1, DEF.DrugLibNo);

%%% drug-drug interactions %%%%%%%%%%%%%%%%%%%%%%%%%%%%%%%%%%%%%%%%%%%%%%%%%%%%%%%%%%%
DRUG.Ki_CYP          = zeros(SYSTEM.CYPliNo, DEF.DrugLibNo);

DRUG.kinact_CYP      = zeros(SYSTEM.CYPliNo, DEF.DrugLibNo);
DRUG.Kapp_CYP        = zeros(SYSTEM.CYPliNo, DEF.DrugLibNo);

DRUG.IndMax_CYP      = zeros(SYSTEM.CYPliNo, DEF.DrugLibNo);
DRUG.IC50_CYP        = zeros(SYSTEM.CYPliNo, DEF.DrugLibNo);

%_load the drug models_____
%load the user-defined drug model
addpath('DrugLibrary');

%convert the string of the user chosen drug model to the function in the library
for d = 1:DRUG.DrugNo
    switch d
        case 1
            drug1 = str2func(DEF.name{dru, DRUG.DrugName(d)});
            drug1();

        case 2
            drug2 = str2func(DEF.name{dru, DRUG.DrugName(d)});
            drug2();

        case 3
            drug3 = str2func(DEF.name{dru, DRUG.DrugName(d)});
            drug3();
    end
end

%_PostProcessing_____
%Extract only non-zero values for used drugs in the simulation based on MW
ParGen      = [DRUG.MolW; DRUG.logP; DRUG.pka; DRUG.BP; DRUG.fu; DRUG.protein; ...
              DRUG.Papp; DRUG.LagRate; ...
              DRUG.KpScalarAll; ...
              DRUG.CLint; DRUG.CLrenal; DRUG.CLrenalCV; ...
              DRUG.CLbile; DRUG.CLbileCV; ...
              DRUG.CLadditional; DRUG.CLadditionalCV];
ParSystem   = [DRUG.KpScalar; DRUG.MolW];
ParCYP      = [DRUG.Vmax_CYP; DRUG.Km_CYP; DRUG.CLint_CYP; ...
              DRUG.Ki_CYP; DRUG.kinact_CYP; DRUG.Kapp_CYP; ...
              DRUG.IndMax_CYP; DRUG.IC50_CYP; DRUG.MolW; ];

%delete zero values
ParGen(:, all (~any (ParGen), 1))) = [];
ParSystem(:, all (~any (ParSystem), 1)) = [];
ParCYP(:, all (~any (ParCYP), 1))) = [];

%factor for DDI studies
if DRUG.DrugNo == 1
    %in the case of only one drug, only auto-induction and inhibition is used
```

```
DDI.DDINo = 1;

else
    DDI.DDINo = 2*DRUG.DrugNo;
end

FacDDI = DDI.DDINo / DRUG.DrugNo;

DDI.MolW      = repmat(ParGen(1, :), 1, FacDDI);
DDI.logP      = repmat(ParGen(2, :), 1, FacDDI);
DDI.pka       = repmat(ParGen(3, :), 1, FacDDI);
DDI.BP        = repmat(ParGen(4, :), 1, FacDDI);
DDI.fu        = repmat(ParGen(5, :), 1, FacDDI);
DDI.protein   = repmat(ParGen(6, :), 1, FacDDI);

DDI.Papp      = repmat(ParGen(7, :), 1, FacDDI);
DDI.LagRate   = repmat(ParGen(8, :), 1, FacDDI);
%if there is no delay, the lag rate is set to a very high value
DDI.LagRate(DDI.LagRate == 0) = 1000;

DDI.KpScalarAll = repmat(ParGen(9, :), 1, FacDDI);
DDI.KpScalar    = repmat(ParSystem(1:SYSTEM.CompNo, :), 1, FacDDI);

%Kp Scalar cannot be 0, because they are multiplied to Kpu
DDI.KpScalarAll(DDI.KpScalarAll == 0) = 1;
DDI.KpScalar(DDI.KpScalar == 0) = 1;

%Vmax is converted from pmol/min/pmol to micromol/h/pmol
DDI.Vmax_CYP    = repmat(ParCYP(1:SYSTEM.CYPliNo, :), 1, FacDDI) .*10^-6 .* 60;

%if Km is 0, it is converted to 1 to prevent dividing by 0 in the code
DDI.Km_CYP      = repmat(ParCYP(SYSTEM.CYPliNo+1:2*SYSTEM.CYPliNo, :), 1, FacDDI);
DDI.Km_CYP(DDI.Km_CYP == 0) = 1;

%CLint (CYP) is converted from microL/min/pmol to L/h/pmol
DDI.CLint_CYP   = repmat(ParCYP(2*SYSTEM.CYPliNo+1:3*SYSTEM.CYPliNo, :), ...
                        1, FacDDI) .*10^-6 .* 60;

%CLint (tot hep) is converted from microL/min/mg to L/h/mg
DDI.CLint       = repmat(ParGen(10, :), 1, FacDDI) .*10^-6 .* 60;

DDI.CLrenal     = repmat(ParGen(11, :), 1, FacDDI);
DDI.CLrenalCV   = repmat(ParGen(12, :), 1, FacDDI);
DDI.CLbile      = repmat(ParGen(13, :), 1, FacDDI);
DDI.CLbileCV    = repmat(ParGen(14, :), 1, FacDDI);
DDI.CLladd      = repmat(ParGen(15, :), 1, FacDDI);
DDI.CLladdCV    = repmat(ParGen(16, :), 1, FacDDI);

DDI.Ki_CYP      = repmat(ParCYP(3*SYSTEM.CYPliNo+1:4*SYSTEM.CYPliNo, :), 1, ↵
FacDDI);
DDI.kinact_CYP  = repmat(ParCYP(4*SYSTEM.CYPliNo+1:5*SYSTEM.CYPliNo, :), 1, ↵
FacDDI);
DDI.Kapp_CYP    = repmat(ParCYP(5*SYSTEM.CYPliNo+1:6*SYSTEM.CYPliNo, :), 1, ↵
```

```

FacDDI);
DDI.IndMax_CYP = repmat(ParCYP(6*SYSTEM.CYPliNo+1:7*SYSTEM.CYPliNo, :), 1, 1,
FacDDI);
DDI.IC50_CYP = repmat(ParCYP(7*SYSTEM.CYPliNo+1:8*SYSTEM.CYPliNo, :), 1, 1,
FacDDI);

%if Ki / Kapp / IC50 is 0, it is converted to 1 to prevent dividing by 0 in the
code
DDI.Ki_CYP(DDI.Ki_CYP == 0) = 1;
DDI.Kapp_CYP(DDI.Kapp_CYP == 0) = 1;
DDI.IC50_CYP(DDI.IC50_CYP == 0) = 1;

%% name of drugs for outputs %%%%%%%%%%%%%%%%%%%%%%%%%%%%%%%%%%%%%%%%%%%%%%%%%%%%%%%%%%
DrugName = cell(DRUG.DrugNo, 1); DDIName = cell(DDI.DDINo, 1);

%save the name of the drug into a new vector
for d = 1:DRUG.DrugNo
    DrugName{d} = DEF.name{5, DRUG.DrugName(d)};
end

%DDI predictions need a combined name
Help = ' + ';

for d = 1:DRUG.DrugNo
    switch d
        case 1
            DDIName{d} = DrugName{d};
        case 2
            DDIName{d} = DrugName{d};
            DDIName{d+1} = [DrugName{d-1}, Help, DrugName{d}];
            DDIName{d+2} = [DrugName{d}, Help, DrugName{d-1}];
        case 3
            DDIName{d} = DrugName{d};
            DDIName{d+1} = [DrugName{d-2}, Help, DrugName{d-1} , Help, DrugName{d}];
            DDIName{d+2} = [DrugName{d-1}, Help, DrugName{d-2} , Help, DrugName{d}];
            DDIName{d+3} = [DrugName{d}, Help, DrugName{d-2} , Help, DrugName{d-1}];
    end
end

%save the name for DDI predictions globally
DDI.Name = DDIName;

%__drug absorption_____
%% Effective permeability %%%%%%%%%%%%%%%%%%%%%%%%%%%%%%%%%%%%%%%%%%%%%%%%%%%%%%%%%%
%in vitro - in vivo relationship comes from Sun et al., 2002
PeffMen = 10.^ (0.6795 .* log10(DDI.Papp) - 0.3355);
PeffMen = permute( repmat(PeffMen, STUDY.IndNo, 1, SYSTEM.SegNo), [1, 3, 2]);

%PeffAll for each of the segments will be based on the difference in length
%following the approach by Darwich et al., 2010
PeffMen = PeffMen .* (SYSTEM.LengthGU ./ sum(SYSTEM.LengthGU, 2));

%absorption clearance, which will be used in the model

```



```
DDI.CLab = repmat(SYSTEM.PSA, 1, 1, DDI.DDINo) .* PeffMen .* 3600 .* 0.001;
```

```
%_drug distribution
```

```
%% Define plasma concentration of the main binding protein
```

```
%concentration of the plasma-binding protein in [g/L]
```

```
ProtConc = zeros(STUDY.IndNo, DDI.DDINo);
```

```
%reference for the calculation of age-dependency (reference is 30 years)
```

```
ProtRef = zeros(STUDY.IndNo, DDI.DDINo);
```

```
%partition coefficient for plasma-binding proteins into the tissue
```

```
KpPR = zeros(STUDY.IndNo, SYSTEM.CompNo, DDI.DDINo);
```

```
for d = 1:DDI.DDINo
```

```
    if DDI.protein(d) == DEF.albumin
        ProtConc(:, d) = SYSTEM.Albumin;
        ProtRef(:, d) = 45.6;
        KpPR(:, :, d) = SYSTEM.KpHSA;
```

```
    elseif DDI.protein(d) == DEF.AAG
        ProtConc(:, d) = SYSTEM.AAG;
        ProtRef(:, d) = 0.798;
        KpPR(:, :, d) = SYSTEM.KpHSA;
```

```
    end
```

```
end
```

```
%% pH-dependent parameters for distribution (Rodgers & Rowland) %%%%%%%%%%%%%%%%%%%%%%%%%%%%%%%%%%%%%%%%%%%%%%%%%%%%%%%%%%%%%%%%%%%%%%%%%%
```

```
%this are the X,Y and Z parameter from Rodgers & Rowland
```

```
DDI.KRio = zeros(SYSTEM.CompNo, DDI.DDINo);
```

```
for com = 1:SYSTEM.CompNo
```

```
    for d = 1:DDI.DDINo
```

```
        DDI.KRio(com, d) = 1 + 10.^(DDI.pka(d) - SYSTEM.pH(com));
```

```
    end
```

```
end
```

```
%% vegetable oil:water partition coefficient %%%%%%%%%%%%%%%%%%%%%%%%%%%%%%%%%%%%%%%%%%%%%%%%%%%%%%%%%%%%%%%%%%%%%%%%%%
```

```
% prediction according to Poulin & Theil (2002), because it is assumed that
```

```
%it predicts partitioning into the adipose tissue better
```

```
DDI.logD = 1.115.*(abs(DDI.logP)) - 1.35 - log10(DDI.KRio(DEF.plasma, :));
```

```
%% fraction unbound in plasma - age-dependent changes %%%%%%%%%%%%%%%%%%%%%%%%%%%%%%%%%%%%%%%%%%%%%%%%%%%%%%%%%%%%%%%%%%%%%%%%%%
```

```
DDI.fup = 1 ./ (1 + (((1./(repmat(DDI.fu, STUDY.IndNo, 1))) - 1)./ ...
    ProtRef).*ProtConc));
```

```
%% fraction unbound in the interstitial space %%%%%%%%%%%%%%%%%%%%%%%%%%%%%%%%%%%%%%%%%%%%%%%%%%%%%%%%%%%%%%%%%%%%%%%%%%
```

```
%fuint is based on the semiphysiological Bmax model
```

```
%it is only calculated for albumin, because AAG doesn't distribute to Vint
```

```
DDI.fuine = ones(STUDY.IndNo, SYSTEM.CompNo, DDI.DDINo);
```

```
for d = 1:DDI.DDINo
```

```

if DDI.protein(d) == DEF.albumin
    DDI.fuine(:, :, d) = 1 ./ (((SYSTEM.KpHSA./SYSTEM.FraEW) .* ...
        ((1./DDI.fup(:, d)) - 1)) + 1);
end
end

%% fraction unbound in the cellular space %%%%%%%%%%%
%fucel is based on Rodgers & Rowland
%it is only calculated for albumin, because AAG does not need to be considered

DDI.fucel = ones(STUDY.IndNo, SYSTEM.CompNo, DDI.DDINo);
for d = 1:DDI.DDINo
    if DDI.protein(d) == DEF.albumin
        DDI.fucel(:, :, d) = 1 ./ (1 + ((DDI.logP(d).*SYSTEM.FraNL + ...
            (0.3.*DDI.logP(d) + 0.7).*SYSTEM.FraNP)./ ...
            DDI.KRio(DEF.plasma, d)) + ...
            SYSTEM.KpHSA.*ProtConc(:, d)));
    end
end

%% tissue-partition coefficient %%%%%%%%%%%
DDI.KaPR = zeros(STUDY.IndNo, DDI.DDINo);
DDI.Kpu = zeros(STUDY.IndNo, SYSTEM.CompNo, DDI.DDINo);

for d = 1:DDI.DDINo

    for ind = 1:STUDY.IndNo
        DDI.KaPR(ind, d) = ((1 ./ DDI.fup(ind, d)) - 1 - ...
            ((DDI.logP(d) .* SYSTEM.FraNL(ind, DEF.plasma) + ((0.3.*
*DDI.logP(d) + 0.7) .* SYSTEM.FraNP(ind, DEF.plasma))) ./ DDI.KRio(DEF.plasma, d)))
.* ...
            (1 ./ ProtConc(ind, d)));

        for com = 1:SYSTEM.CompNo
            DDI.Kpu(ind, com, d) = (((DDI.KRio(com, d) .* SYSTEM.FraIW(ind, com))
/ DDI.KRio(DEF.plasma, d)) + ...
                SYSTEM.FraEW(ind, com) + ...
                ((DDI.logP(d) .* SYSTEM.FraNL(ind, com) + (0.3.*
.* DDI.logP(d) + 0.7) .* SYSTEM.FraNP(ind, com)) ./ DDI.KRio(DEF.plasma, d)) + ...
                (DDI.KaPR(ind, d) .* KpPR(ind, com, d) *
ProtConc(ind, d))) .* ...
                DDI.KpScalarAll(d) .* DDI.KpScalar(com, d);
        end

        DRUG.Kpu(ind, DEF.adipose, d) = (((DDI.KRio(DEF.adipose, d) .* SYSTEM.FraIW
(ind, DEF.adipose)) ./ DDI.KRio(DEF.plasma, d)) + ...
            SYSTEM.FraEW(ind, DEF.adipose) + ...
            ((DDI.logD(d) .* SYSTEM.FraNL(ind, DEF.
adipose) + (0.3 .* DDI.logD(d) + 0.7) .* SYSTEM.FraNP(ind, DEF.adipose)) ./ DDI.
KRio(DEF.plasma, d)) + ...
            (DDI.KaPR(ind, d) .* KpPR(ind, DEF.
adipose, d) * ProtConc(ind, d))) .* ...
            DDI.KpScalarAll(d) .* DDI.KpScalar(DEF.

```

```

adipose, d);
    end
end

%% flux through the membrane %%%%%%%%%%%%%%%%%%%%%%%%%%%%%%%%%%%%%%%%%%%%%%%%%%%%%%%%%%%%%%%%%%%%%%%%%
DDI.Jout = repmat(SYSTEM.Qorg, 1, 1, DDI.DDINO);

%prepare variable for faster calculations
BP = permute (repmat (DDI.BP, STUDY.IndNo, 1, SYSTEM.OrgNo), [1, 3, 2]);

DDI.Jin = (abs((DDI.Kpu(:, 1:16, :) - (1./BP)) .* (DDI.fucel(:, 1:16, :) ./ ...
    DDI.fuine(:, 1:16, :))) .* DDI.Jout);

%% Volume of distribution [L/kg] %%%%%%%%%%%%%%%%%%%%%%%%%%%%%%%%%%%%%%%%%%%%%%%%%%%%%%%%%%%%%%%%%%%%%%%%%
DDI.Vss = zeros(STUDY.IndNo, DDI.DDINO);

for d = 1:DDI.DDINO
    DDI.Vss(:, d) = ((SYSTEM.Vorg(:, DEF.plasma) ./ DDI.fup(:, d)) + ...
        (sum(SYSTEM.Vorg(:, 1:SYSTEM.OrgNo) .* ...
            DDI.Kpu(:, 1:SYSTEM.OrgNo, d), 2))./SYSTEM.Weight);
end

%_drug elimination_____
%prepare empty vectors
DDI.CLre = zeros(STUDY.IndNo, DDI.DDINO);
DDI.CLbi = zeros(STUDY.IndNo, DDI.DDINO);
DDI.CLad = zeros(STUDY.IndNo, DDI.DDINO);

for d = 1:DDI.DDINO
    %renal clearance in [L/h]
    DDI.CLre(:, d) = normrnd(DDI.CLrenal(d), ...
        ((DDI.CLrenalCV(d)/100) .* DDI.CLrenal(d)), ...
        STUDY.IndNo, 1);

    %biliary clearance in [L/h]
    DDI.CLbi(:, d) = normrnd(DDI.CLbile(d), ...
        ((DDI.CLbileCV(d)./100) .* DDI.CLbile(d)), ...
        STUDY.IndNo, 1);

    %additional plasma clearance in [L/h]
    DDI.CLad(:, d) = normrnd(DDI.CLadd(d), ...
        ((DDI.CLaddCV(d)./100) .* DDI.CLadd(d)), ...
        STUDY.IndNo, 1);
end

%link the renal clearance to the GFR of each individual
for d = DDI.DDINO
    DDI.CLre(:, d) = DDI.CLre(:, d) .* ...
        (SYSTEM.GFR ./ (130 - 10.*SYSTEM.Sex)) .* ...
        (DDI.fup(:, d) ./ DDI.fu(d));
end

%ritonavir has an impact on the renal clearance of rivaroxaban, which is not

```

```
%mechanistically in the model, but will be considered
```

```
global Index
```

```
for dr = 1:DRUG.DrugNo
```

```
    if DRUG.DrugName(dr) == DEF.rivaroxaban
```

```
        if DRUG.DrugName(dr-1) == DEF.ritonavir
```

```
            Index = find(DRUG.DrugName == DEF.rivaroxaban);
```

```
            DDI.CLre(:, Index + DRUG.DrugNo) = 0.5 .* DDI.CLre(:, Index + DRUG.↵
```

```
DrugNo);
```

```
        end
```

```
    end
```

```
end
```

```
%_prepare DDI matrix
```

```
%% Variables for DDI matrix %%%%%%%%%%%%%%%%%%%%%%%%%%%%%%%%%%%%%%%%%%%%%%%%%%%%%%%%%%%%%%%%%%%%%%%%%%
```

```
%define three different drugs A-c
```

```
drugA = 1;    drugB = 2;    drugC = 3;
```

```
%six different DDIs are possible
```

```
ddi_1 = 1;    %drug A alone
```

```
ddi_2 = 2;    %drug B alone
```

```
ddi_3 = 3;    %drug A with drug B / drug C alone
```

```
ddi_4 = 4;    %drug B with drug A / drug A with drug B and C
```

```
ddi_5 = 5;    %drug B with drug A and C
```

```
ddi_6 = 6;    %drug C with drug A and B
```

```
%abbreviation for organs to define concentration for the DDI matrix
```

```
LI = DEF.liver;
```

```
DU = SYSTEM.CompNo + DEF.duodenum;
```

```
JE = SYSTEM.CompNo + DEF.jejunum;
```

```
IL = SYSTEM.CompNo + DEF.ileum;
```

```
%organs can be divided into three different subcompartments
```

```
cel = 2;
```

```
%intestinal segments can be divided into fluid, transit uptake and enterocytes
```

```
ent = 2;
```

```
%_DDI Matrix
```

```
%% Generate interaction parameters for all drugs %%%%%%%%%%%%%%%%%%%%%%%%%%%%%%%%%%%%%%%%%%%%%%%%%%%%%%%%%%%%%%%%%%%%%%%%%%
```

```
%Ki for CYP enzymes
```

```
Ki_CYP = permute( repmat( DDI.Ki_CYP(:, 1:DRUG.DrugNo), 1, 1, DDI.DDINO), ...  
                [2, 3, 1]);
```

```
switch DRUG.DrugNo
```

```
    case 2
```

```
        %ddi_1 and ddi_2 are drug A and drug B alone
```

```
        Ki_CYP(drugB, ddi_1, :) = 1;    Ki_CYP(drugA, ddi_2, :) = 1;
```

```
    case 3
```

```
        %ddi_1, ddi_2 and ddi_3 are drug A, drug B and drug C alone
```

```
        Ki_CYP(drugB, ddi_1, :) = 1;    Ki_CYP(drugC, ddi_1, :) = 1;
```

```
        Ki_CYP(drugA, ddi_2, :) = 1;    Ki_CYP(drugC, ddi_2, :) = 1;
```

```
        Ki_CYP(drugA, ddi_3, :) = 1;    Ki_CYP(drugB, ddi_3, :) = 1;
```

```
end
```

```

%generate a factor to prevent dividing by 0 when Ki = 0
Fki_CYP = ones(DRUG.DrugNo, DDI.DDINo, SYSTEM.CYpliNo);
Fki_CYP(Ki_CYP == 1) = 0;

%MBI for CYP enzymes
kinact_CYP = permute( repmat( DDI.kinact_CYP(:, 1:DRUG.DrugNo), ...
                             1, 1, DDI.DDINo), [2, 3, 1]);
Kapp_CYP    = permute( repmat( DDI.Kapp_CYP(:, 1:DRUG.DrugNo), ...
                             1, 1, DDI.DDINo), [2, 3, 1]);

switch DRUG.DrugNo
  case 2
    kinact_CYP(drugB, ddi_1, :) = 0;      kinact_CYP(drugA, ddi_2, :) = 0;

    Kapp_CYP(drugB, ddi_1, :) = 1;      Kapp_CYP(drugA, ddi_2, :) = 1;
  case 3
    kinact_CYP(drugB, ddi_1, :) = 0;      kinact_CYP(drugC, ddi_1, :) = 0;
    kinact_CYP(drugA, ddi_2, :) = 0;      kinact_CYP(drugC, ddi_2, :) = 0;
    kinact_CYP(drugA, ddi_3, :) = 0;      kinact_CYP(drugB, ddi_3, :) = 0;

    Kapp_CYP(drugB, ddi_1, :) = 1;      Kapp_CYP(drugC, ddi_1, :) = 1;
    Kapp_CYP(drugA, ddi_2, :) = 1;      Kapp_CYP(drugC, ddi_2, :) = 1;
    Kapp_CYP(drugA, ddi_3, :) = 1;      Kapp_CYP(drugB, ddi_3, :) = 1;
end

%Induction for CYP enzymes
IndMax_CYP = permute( repmat( DDI.IndMax_CYP(:, 1:DRUG.DrugNo), ...
                             1, 1, DDI.DDINo), [2, 3, 1]);
IC50_CYP    = permute( repmat( DDI.IC50_CYP(:, 1:DRUG.DrugNo), ...
                             1, 1, DDI.DDINo), [2, 3, 1]);

switch DRUG.DrugNo
  case 2
    IndMax_CYP(drugB, ddi_1, :) = 0;      IndMax_CYP(drugA, ddi_2, :) = 0;

    IC50_CYP(drugB, ddi_1, :) = 1;      IC50_CYP(drugA, ddi_2, :) = 1;
  case 3
    IndMax_CYP(drugB, ddi_1, :) = 0;      IndMax_CYP(drugC, ddi_1, :) = 0;
    IndMax_CYP(drugA, ddi_2, :) = 0;      IndMax_CYP(drugC, ddi_2, :) = 0;
    IndMax_CYP(drugA, ddi_3, :) = 0;      IndMax_CYP(drugB, ddi_3, :) = 0;

    IC50_CYP(drugB, ddi_1, :) = 1;      IC50_CYP(drugC, ddi_1, :) = 1;
    IC50_CYP(drugA, ddi_2, :) = 1;      IC50_CYP(drugC, ddi_2, :) = 1;
    IC50_CYP(drugA, ddi_3, :) = 1;      IC50_CYP(drugB, ddi_3, :) = 1;
end

%% choose the correct concentration and fu %%%%%%%%%%%
%multiplying factor for the concentration
Fco = ones(DRUG.DrugNo, DDI.DDINo);

switch DRUG.DrugNo
  case 2
    Fco(drugA, ddi_4) = 0;
    Fco(drugB, ddi_3) = 0;

```

```

case 3
    Fco(drugA, ddi_5) = 0;      Fco(drugA, ddi_6) = 0;
    Fco(drugB, ddi_4) = 0;      Fco(drugB, ddi_6) = 0;
    Fco(drugC, ddi_4) = 0;      Fco(drugC, ddi_5) = 0;
end

%additive factor for the concentration depending on the compartment
FcellLI = zeros(DRUG.DrugNo, DDI.DDINO);
FentDU = zeros(DRUG.DrugNo, DDI.DDINO);
FentJE = zeros(DRUG.DrugNo, DDI.DDINO);
FentIL = zeros(DRUG.DrugNo, DDI.DDINO);

%fraction unbound for DDI predictions
fuLIcel = permute (repmat (DDI.fucel(:, DEF.liver, 1:DRUG.DrugNo), 1, DDI.DDINO, \
1), ...
    [3, 2, 1]);
fuGUent = permute (repmat (DDI.fucel(:, DEF.gut, :), 1, DRUG.DrugNo, 1), ...
    [2, 3, 1]);

switch DRUG.DrugNo
    case 2
        FcellLI(drugA, ddi_4) = LI + SYSTEM.SubNo(LI) + cel;
        FcellLI(drugB, ddi_3) = MODEL.ODENo + LI + SYSTEM.SubNo(LI) + cel;

        fuLIcel(drugA, ddi_2, :) = zeros(STUDY.IndNo, 1);
        fuLIcel(drugB, ddi_1, :) = zeros(STUDY.IndNo, 1);

        FentDU(drugA, ddi_4) = DU + SYSTEM.SubNo(DU) + ent;
        FentDU(drugB, ddi_3) = MODEL.ODENo + DU + SYSTEM.SubNo(DU) + ent;

        FentJE(drugA, ddi_4) = JE + SYSTEM.SubNo(JE) + ent;
        FentJE(drugB, ddi_3) = MODEL.ODENo + JE + SYSTEM.SubNo(JE) + ent;

        FentIL(drugA, ddi_4) = IL + SYSTEM.SubNo(IL) + ent;
        FentIL(drugB, ddi_3) = MODEL.ODENo + IL + SYSTEM.SubNo(IL) + ent;

        fuGUent(drugA, ddi_2, :) = zeros(STUDY.IndNo, 1);
        fuGUent(drugB, ddi_1, :) = zeros(STUDY.IndNo, 1);

    case 3
        FcellLI(drugA, [ddi_5, ddi_6]) = LI + SYSTEM.SubNo(LI) + cel;
        FcellLI(drugB, [ddi_4, ddi_6]) = MODEL.ODENo + LI + SYSTEM.SubNo(LI) + cel;
        FcellLI(drugC, [ddi_4, ddi_5]) = 2*MODEL.ODENo + LI + SYSTEM.SubNo(LI) + \
cel;

        fuLIcel(drugA, [ddi_2, ddi_3], :) = zeros(1, 2, STUDY.IndNo);
        fuLIcel(drugB, [ddi_1, ddi_3], :) = zeros(1, 2, STUDY.IndNo);
        fuLIcel(drugC, [ddi_1, ddi_2], :) = zeros(1, 2, STUDY.IndNo);

        FentDU(drugA, [ddi_5, ddi_6]) = DU + SYSTEM.SubNo(DU) + ent;
        FentDU(drugB, [ddi_4, ddi_6]) = MODEL.ODENo + DU + SYSTEM.SubNo(DU) + ent;
        FentDU(drugC, [ddi_4, ddi_5]) = 2*MODEL.ODENo + DU + SYSTEM.SubNo(DU) + \
ent;

```

```
FentJE(drugA, [ddi_5, ddi_6]) = JE + SYSTEM.SubNo(JE) + ent;
FentJE(drugB, [ddi_4, ddi_6]) = MODEL.ODENo + JE + SYSTEM.SubNo(JE) + ent;
FentJE(drugC, [ddi_4, ddi_5]) = 2*MODEL.ODENo + JE + SYSTEM.SubNo(JE) + ent;
ent;

FentIL(drugA, [ddi_5, ddi_6]) = IL + SYSTEM.SubNo(IL) + ent;
FentIL(drugB, [ddi_4, ddi_6]) = MODEL.ODENo + IL + SYSTEM.SubNo(IL) + ent;
FentIL(drugC, [ddi_4, ddi_5]) = 2*MODEL.ODENo + IL + SYSTEM.SubNo(IL) + ent;
ent;

fuGUent(drugA, [ddi_2, ddi_3], :) = zeros(1, 2, STUDY.IndNo);
fuGUent(drugB, [ddi_1, ddi_3], :) = zeros(1, 2, STUDY.IndNo);
fuGUent(drugC, [ddi_1, ddi_2], :) = zeros(1, 2, STUDY.IndNo);
end

%% Combine all data into one matrix to inform the ODE system %%%%%%%%%%%
STUDY.DDIMat = {'Fco', 'FcellI', 'FentDU', 'FentJE', 'FentIL', 'fuLIcel',
'fuGUent';...
               Fco, FcellI, FentDU, FentJE, FentIL, fuLIcel, fuGUent};

STUDY.DDIMat_CYP = {'Fki', 'Ki', 'kinact', 'Kapp', 'IndMax', 'IC50';...
                   Fki_CYP, Ki_CYP, kinact_CYP, Kapp_CYP, IndMax_CYP, IC50_CYP};
end

%=====
%% USED REFERENCES %%%%%%%%%%%
%=====
% Sun D, Lennernäs H, Welage LS, Barnett JL, Landowski CP, Foster D, Fleisher D,
Lee K-D, & Amidon GL. Comparison of human duodenum and Caco-2 gene expression
profiles for 12,000 gene sequences tags and correlation with permeability of 26
drugs. Pharmaceutical Research, 2002. 19(10): 1400-1416.
% Rodgers T & Rowland M. Mechanistic approaches to volume of distribution
predictions: understanding the processes. Pharmaceutical Research, 2007. 24(5):
918-933.
% Poulin P & Theil FP. Prediction of pharmacokinetics prior to in vivo studies. 1.
Mechanism-based prediction of volume of distribution. Journal of Pharmaceutical
Sciences, 2002. 91(1): 129-156.
```

```

function[] = SolveODE()
%This function solves the ordinary differential equations

global DEF          %global DEF defines model parameters
global SYSTEM      %global SYSTEM defines sytem parameters
global DRUG        %global DRUG defines drug parameters
global DDI         %global DDI enhances drug parameters for DDI prediction
global STUDY       %global STUDY defines study design parameters
global MODEL       %global MODEL defines parameters important for modeling
global RES         %global RES saves the results for post-processing

%_ Numbering variables for ODE solver _____
CompNo = SYSTEM.CompNo;          %number of organs / tissues + blood
CoSeNo = SYSTEM.CompNo + SYSTEM.SegNo; %compartments + intestinal segments
SubNo = SYSTEM.SubNo;           %number of subcompartments
IndNo = STUDY.IndNo;            %number of virtual individuals
DrugNo = DRUG.DrugNo;          %number of drugs
DDINo = DDI.DDINo;             %number of DDI simulations
ODENo = MODEL.ODENo;           %number of ODE equations

%% Model structure %%%%%%%%%%%%%%%%%%%%%%%%%%%%%%%%%%%%%%%%%%%%%%%%%%%%%%%%%%%%%%%%%%%%%%%%%
LU = DEF.lung;                  AD = DEF.adipose;                BO = DEF.bone;
BR = DEF.brain;                 GO = DEF.gonads;                HE = DEF.heart;
KI = DEF.kidney;                MU = DEF.muscle;                SK = DEF.skin;
TH = DEF.thymus;                GU = DEF.gut;                   SP = DEF.spleen;
PA = DEF.pancreas;              LI = DEF.liver;                 LN = DEF.lymphnode;
RE = DEF.remaining;             VB = DEF.plasma;                AB = DEF.RBC;
ST = CompNo + DEF.stomach;       DU = CompNo + DEF.duodenum;
JE = CompNo + DEF.jejunum;       IL = CompNo + DEF.ileum;
CN = CompNo + DEF.colon;         FS = CompNo + DEF.faeces;

C2D6 = CoSeNo + DEF.CYP2D6;      C3A4 = CoSeNo + DEF.CYP3A4;
C3A5 = CoSeNo + DEF.CYP3A5;      C2J2 = CoSeNo + DEF.CYP2J2;

%% No of equations %%%%%%%%%%%%%%%%%%%%%%%%%%%%%%%%%%%%%%%%%%%%%%%%%%%%%%%%%%%%%%%%%%%%%%%%%
if DRUG.DrugNo == 1
    NumEquations = ODENo * DrugNo;
else
    NumEquations = ODENo * DDINo;
end

%% intestinal segments %%%%%%%%%%%%%%%%%%%%%%%%%%%%%%%%%%%%%%%%%%%%%%%%%%%%%%%%%%%%%%%%%%%%%%%%%
sto = DEF.stomach;                duo = DEF.duodenum;                jej = DEF.jejunum;
ile = DEF.ileum;                  col = DEF.colon;

%% CYP enzymes %%%%%%%%%%%%%%%%%%%%%%%%%%%%%%%%%%%%%%%%%%%%%%%%%%%%%%%%%%%%%%%%%%%%%%%%%
CYP2D6 = DEF.CYP2D6;              CYP3A4 = DEF.CYP3A4;
CYP3A5 = DEF.CYP3A5;              CYP2J2 = DEF.CYP2J2;

%_ System data _____
%% Volumes %%%%%%%%%%%%%%%%%%%%%%%%%%%%%%%%%%%%%%%%%%%%%%%%%%%%%%%%%%%%%%%%%%%%%%%%%
Vvb = SYSTEM.Vvein;              %volume for the venous blood pool
Vab = SYSTEM.Vartery;            %volume for the arterial blood pool

```



```
Vvas = SYSTEM.Vvas;           %vascular volume for each compartment
Vint = SYSTEM.Vint;          %interstitial volume for each compartment
Vcel = SYSTEM.Vcel;          %intracellular volume for each compartment
Vlum = SYSTEM.VlumCAT;       %volume of the intestinal lumen
Vent = SYSTEM.VentCAT;       %volume of enterocytes in each segment of the intestine

%% Blood and lymph flows %%%%%%%%%%%%%%%%%%%%%%%%%%%%%%%%%%%%%%%%%%%%%%%%%%%%%%%%%%%
CO   = SYSTEM.Qorg(:, LU);    %cardiac output
Qorg = SYSTEM.Qorg;           %regional blood flows
QHA  = SYSTEM.QHA;            %hepatic arterial blood flow
QBY  = SYSTEM.QBY;            %blood flow of the liver bypass

Porg = Qorg.*(1-SYSTEM.HCT);  %plasma flow

Ltot = SYSTEM.TotLymphFlow ;  %total lymph flow
Lorg  = SYSTEM.Lorg;           %regional lymph flows
QL    = Qorg - Lorg;           %subtract regional blood from lymph flows
PL    = Porg - Lorg;           %subtract regionalplasma from lymph flows

%% GI tract %%%%%%%%%%%%%%%%%%%%%%%%%%%%%%%%%%%%%%%%%%%%%%%%%%%%%%%%%%%
ITT = 1./SYSTEM.TransitT;     %intestinal transit time

AbCYPin = SYSTEM.CYPseg_AB .* 10^3; %abundance of intestinal enzymes in [pmol]
kdCYPin = SYSTEM.CYPin_kdeg;      %degradation rate of intestinal enzymes

%% Liver %%%%%%%%%%%%%%%%%%%%%%%%%%%%%%%%%%%%%%%%%%%%%%%%%%%%%%%%%%%
WLI    = SYSTEM.Worg(:, LI);    %liver weight
MPPGL  = SYSTEM.MPPGL;          %microsomal protein per gram liver (MPPGL)

AbCYPhe = SYSTEM.CYPhe_AB;      %hepatic CYP enzyme abundance
kdCYPhe = SYSTEM.CYPhe_kdeg;     %degradation rate of hepatic CYP enzymes

%_Drug data
%% PhysChem properties %%%%%%%%%%%%%%%%%%%%%%%%%%%%%%%%%%%%%%%%%%%%%%%%%%%%%%%%%%%
MW      = DDI.MolW;             %molecular weight
fuine   = DDI.fuine;            %fraction unbound in the interstitial space
fucel   = DDI.fucel;            %fraction unbound in the intracellular space
BP      = DDI.BP;               %blood-to-plasma ratio

%% Absorption %%%%%%%%%%%%%%%%%%%%%%%%%%%%%%%%%%%%%%%%%%%%%%%%%%%%%%%%%%%
CLab    = DDI.CLab;             %absorption flux from the lumen into the enterocytes
LagR    = DDI.LagRate;          %lag rate to delay Cmax/Tmax - parameter is artificial

%% Distribution %%%%%%%%%%%%%%%%%%%%%%%%%%%%%%%%%%%%%%%%%%%%%%%%%%%%%%%%%%%
Jin     = DDI.Jin;              %flux from the interstitial to the intracellular space
Jout    = DDI.Jout;             %flux from the intracellular to the interstitial space

%% Metabolism and Elimination %%%%%%%%%%%%%%%%%%%%%%%%%%%%%%%%%%%%%%%%%%%%%%%%%%%%%%%%%%%
CLint   = DDI.CLint;            %intrinsic clearance of an unspecified enzyme pathway
CLbi    = DDI.CLbi;             %biliary clearance
CLre    = DDI.CLre;             %renal clearance
CLad    = DDI.CLad;             %additional plasma clearance
```

```

VmCYP = DDI.Vmax_CYP;      %Vmax for CYP enzymes
KmCYP = DDI.Km_CYP;       %KM for CYP enzymes
CiCYP = DDI.CLint_CYP;    %intrinsic clearance for CYP enzymes

%% DDIs %%%%%%%%%%%%%%%%%%%%%%%%%%%%%%%%%%%%%%%%%%%%%%%%%%%%%%%%%%%
Fco = STUDY.DDIMat{2,1};   %factor for concentration
                             %1 = automatic concentration is used
                             %0 = concentration of the perpetrator is used

%factor for concentration of the perpetrator in the relevant compartment
FcellI = STUDY.DDIMat{2,2}; %intracellular concentration in the liver
FentDU = STUDY.DDIMat{2,3}; %enterocytic concentration in the duodenum
FentJE = STUDY.DDIMat{2,4}; %enterocytic concentration in the jejunum
FentIL = STUDY.DDIMat{2,5}; %enterocytic concentration in the ileum

%fraction unbound ofr the perpetrator
fuLlcel = STUDY.DDIMat{2,6}; %fraction unbound in the liver
fuGUcel = STUDY.DDIMat{2,7}; %fraction unbound in the enterocytes

FKiCYP = STUDY.DDIMat_CYP{2,1}; %factor for competitive inhibition
                             %0 = no competitive inhibition
                             %1 = competitive inhibition is considered

KiCYP = STUDY.DDIMat_CYP{2,2}; %inhibition constant

kinactCYP = STUDY.DDIMat_CYP{2,3}; %maximum inactivation rate constant
KappCYP = STUDY.DDIMat_CYP{2,4}; %apparent enzyme inhibition constant
IndMaxCYP = STUDY.DDIMat_CYP{2,5}; %maximum fold of induction
IC50CYP = STUDY.DDIMat_CYP{2,6}; %half-maximum induction

%_Study design
Dose = reshape(STUDY.DoseEventMat(:, 3, :), STUDY.NoEvents, DRUG.DrugNo);
AdminRoute = reshape(STUDY.DoseEventMat(:, 4, :), STUDY.NoEvents, DRUG.DrugNo);

rep = DDI.DDINO / DRUG.DrugNo;
Dose = repmat(Dose, 1, rep);
AdminRoute = repmat(AdminRoute, 1, rep);

StartT = STUDY.DoseEventMat(:, 1, 1); %start time for drug administration
EndT = STUDY.DoseEventMat(:, 2, 1); %end time for drug administration

NP = STUDY.DoseEventMat(:, 5, 1); %resolution for one dosing event
NumPoints = sum(STUDY.DoseEventMat(:, 5, 1)); %resolution for entire simulation

%_Set up initial conditions
%predefine matrices for the time and the concentration output
Conc = zeros(NumPoints, NumEquations*IndNo);

%set up the right concentration for multiple dosing
MultConc = [STUDY.DoseEventMat(:, 6, 1) + 1, ...
            STUDY.DoseEventMat(:, 5, 1) + STUDY.DoseEventMat(:, 6, 1)];

disp('Start ODE');

```

```

for ind = 1:IndNo
    %save time and concentration for each subject
    TInd = zeros(NumPoints, 1);
    CInd = zeros(NumPoints, NumEquations);

    %command to load a function to estimate the initial concentration C0
    C0 = Initialise_Conc();

    for ne = 1:STUDY.NoEvents
        %initial concentration for multiple dosing M0
        M0 = Initialise_Mult(C0);

    %__Solve equations_____
        %use a stiff solver - alternatively ode45 might be used
        sol = ode15s(@rhs_function, [StartT(ne,1),EndT(ne,1)], M0);

    %__Save solution to a vector_____
        %time vector for each multiple dosing step is generated
        T = linspace(StartT(ne, 1), EndT(ne, 1), NP(ne, 1))';

        %evaluate the solution sol at each timepoint T
        C = deval(sol, T)';

        TInd(MultConc(ne, 1) : MultConc(ne,2), 1) = T;
        CInd(MultConc(ne, 1) : MultConc(ne,2), :) = C;

        %combine concentration for each individual
        for eq = 1:NumEquations
            Conc(:, (ind-1) * ODENo * DDINo + eq) = CInd(:, eq);
        end
        fprintf('No of event:          = %g\n',ne);
    end
    fprintf('No of subject:          = %g\n',ind);
end

%__Save solution of the ODE solver globally for post-processing_____
RES.Time          = TInd;          %time in h
RES.Conc          = Conc;          %concentration in microM
MODEL.NP          = NP;
MODEL.NumPoints  = NumPoints;

disp('End ODE');

%=====
%% USED FUNCTION %%%%%%%%%%%%%%%%%%%%%%%%%%%%%%%
%=====

%__Initialise conditions for single dose / first dose_____
function C0 = Initialise_Conc()

    %it is assumed that each concentration is 0
    C0 = zeros(1, NumEquations);

```

```

for cdi = 1:DDINo
    %% initial values for CYP abundance (necessary for MBI & induction) %%
    c2D6 = ODENo*(cdi-1) + C2D6 + SubNo(C2D6);      %CYP2D6
    c3A4 = ODENo*(cdi-1) + C3A4 + SubNo(C3A4);      %CYP3A4
    c3A5 = ODENo*(cdi-1) + C3A5 + SubNo(C3A5);      %CYP3A5
    c2J2 = ODENo*(cdi-1) + C2J2 + SubNo(C2J2);      %CYP2J2

    %initial values for hepatic and intestinal CYP2D6
    C0(1, c2D6) = AbCYPhe(ind, CYP2D6);
    C0(1, c2D6+1) = AbCYPin(ind, CYP2D6, duo);
    C0(1, c2D6+2) = AbCYPin(ind, CYP2D6, jejj);
    C0(1, c2D6+3) = AbCYPin(ind, CYP2D6, ile);

    %initial values for hepatic and intestinal CYP3A4
    C0(1, c3A4) = AbCYPhe(ind, CYP3A4);
    C0(1, c3A4+1) = AbCYPin(ind, CYP3A4, duo);
    C0(1, c3A4+2) = AbCYPin(ind, CYP3A4, jejj);
    C0(1, c3A4+3) = AbCYPin(ind, CYP3A4, ile);

    %initial values for hepatic and intestinal CYP3A5
    C0(1, c3A5) = AbCYPhe(ind, CYP3A5);
    C0(1, c3A5+1) = AbCYPin(ind, CYP3A5, duo);
    C0(1, c3A5+2) = AbCYPin(ind, CYP3A5, jejj);
    C0(1, c3A5+3) = AbCYPin(ind, CYP3A5, ile);

    %initial value for hepatic CYP2J2
    C0(1, c2J2) = AbCYPhe(ind, CYP2J2);

    %% initial values for drug concentration %%%%%%%%%%%
    switch AdminRoute(1, cdi)

        %venous concentration in the case of intravenous administration
        case DEF.iv
            vb = ODENo*(cdi-1) + VB + SubNo(VB);
            C0(1, vb) = ((Dose(1, cdi) * 1000) / MW(cdi)) / Vvb(ind);

        %stomach concentration in teh case of oral drug administration
        case DEF.oral
            st = ODENo*(cdi-1) + ST + SubNo(ST);
            C0(1, st) = ((Dose(1, cdi) * 1000) / MW(cdi)) / Vlum(ind, sto);

    end
end
end

%_Initialise conditions for multiple dosing_____
function M0 = Initialise_Mult(C0)

    %single or first dose
    if ne == 1
        %C0 has already been defined for a single / first dose
        M0 = C0;

    else

```

```

%for all multiple doses, the concentration is defined by the solution sol
M0 = CInd(MultConc(ne-1, 2), :);

for mdi = 1:DDINo
    switch AdminRoute(ne, mdi)

        %venous concentration in the case of intravenous administration
        case DEF.iv
            vb = ODENo*(mdi-1) + VB + SubNo(VB);
            M0(1, vb) = (((Dose(ne, mdi) * 1000) / MW(mdi)) / ...
                Vvb(ind)) + CInd(MultConc(ne-1, 2), vb);

        %stomach concentration in teh case of oral drug administration
        case DEF.oral
            st = ODENo*(mdi-1) + ST + SubNo(ST);
            M0(1, st) = (((Dose(ne, mdi) * 1000) / MW(mdi)) / ...
                Vlum(ind, sto)) + CInd(MultConc(ne-1, 2), st);

    end
end
end
end

%_Define the right hand site of the equations
function dtdy = rhs_function(~, y)

%prepare the output as a column vector
dtdy = zeros(NumEquations, 1);

for d = 1:DDINo
    %define index for each compartment
    lu = ODENo*(d-1) + LU + SubNo(LU); %lung
    ad = ODENo*(d-1) + AD + SubNo(AD); %adipose
    bo = ODENo*(d-1) + BO + SubNo(BO); %bone
    br = ODENo*(d-1) + BR + SubNo(BR); %brain
    go = ODENo*(d-1) + GO + SubNo(GO); %gonads
    he = ODENo*(d-1) + HE + SubNo(HE); %heart
    ki = ODENo*(d-1) + KI + SubNo(KI); %kidney
    mu = ODENo*(d-1) + MU + SubNo(MU); %muscle
    sk = ODENo*(d-1) + SK + SubNo(SK); %skin
    th = ODENo*(d-1) + TH + SubNo(TH); %thymus
    gu = ODENo*(d-1) + GU + SubNo(GU); %gut
    sp = ODENo*(d-1) + SP + SubNo(SP); %spleen
    pa = ODENo*(d-1) + PA + SubNo(PA); %pancreas
    li = ODENo*(d-1) + LI + SubNo(LI); %liver
    ln = ODENo*(d-1) + LN + SubNo(LN); %lymphnode
    re = ODENo*(d-1) + RE + SubNo(RE); %remaining
    vb = ODENo*(d-1) + VB + SubNo(VB); %venous
    ab = ODENo*(d-1) + AB + SubNo(AB); %arterial

    st = ODENo*(d-1) + ST + SubNo(ST); %stomach
    du = ODENo*(d-1) + DU + SubNo(DU); %duodenum
    je = ODENo*(d-1) + JE + SubNo(JE); %jejunum
    il = ODENo*(d-1) + IL + SubNo(IL); %ileum

```

```

cn = ODENo*(d-1) + CN + SubNo(CN);      %colon
fs = ODENo*(d-1) + FS + SubNo(FS);      %faeces

c2D6 = ODENo*(d-1) + C2D6 + SubNo(C2D6); %CYP2D6
c3A4 = ODENo*(d-1) + C3A4 + SubNo(C3A4); %CYP3A4
c3A5 = ODENo*(d-1) + C3A5 + SubNo(C3A5); %CYP3A5
c2J2 = ODENo*(d-1) + C2J2 + SubNo(C2J2); %CYP2J2

%define mechanism-based inhibition (MBI)
MechLI = sum((kinactCYP(:, d, :) .* y((li+2)*Fco(:, d)+FcelLI(:, d)) .*
fuLIcel(:, d, ind)) ./ (KappCYP(:, d, :) + y((li+2)*Fco(:, d)+FcelLI(:, d)) .*
fuLIcel(:, d, ind)), 1);

MechDU = sum((kinactCYP(:, d, :) .* y((du+2)*Fco(:, d)+FentDU(:, d)) .*
fuGUcel(:, d, ind)) ./ (KappCYP(:, d, :) + y((du+2)*Fco(:, d)+FentDU(:, d)) .*
fuGUcel(:, d, ind)), 1);
MechJE = sum((kinactCYP(:, d, :) .* y((je+2)*Fco(:, d)+FentJE(:, d)) .*
fuGUcel(:, d, ind)) ./ (KappCYP(:, d, :) + y((je+2)*Fco(:, d)+FentJE(:, d)) .*
fuGUcel(:, d, ind)), 1);
MechIL = sum((kinactCYP(:, d, :) .* y((il+2)*Fco(:, d)+FentIL(:, d)) .*
fuGUcel(:, d, ind)) ./ (KappCYP(:, d, :) + y((il+2)*Fco(:, d)+FentIL(:, d)) .*
fuGUcel(:, d, ind)), 1);

%define induction
InduLI = sum((IndMaxCYP(:, d, :) .* y((li+2)*Fco(:, d)+FcelLI(:, d)) .*
fuLIcel(:, d, ind)) ./ (IC50CYP(:, d, :) + y((li+2)*Fco(:, d)+FcelLI(:, d)) .*
fuLIcel(:, d, ind)), 1);

InduDU = sum((IndMaxCYP(:, d, :) .* y((du+2)*Fco(:, d)+FentDU(:, d)) .*
fuGUcel(:, d, ind)) ./ (IC50CYP(:, d, :) + y((du+2)*Fco(:, d)+FentDU(:, d)) .*
fuGUcel(:, d, ind)), 1);
InduJE = sum((IndMaxCYP(:, d, :) .* y((je+2)*Fco(:, d)+FentJE(:, d)) .*
fuGUcel(:, d, ind)) ./ (IC50CYP(:, d, :) + y((je+2)*Fco(:, d)+FentJE(:, d)) .*
fuGUcel(:, d, ind)), 1);
InduIL = sum((IndMaxCYP(:, d, :) .* y((il+2)*Fco(:, d)+FentIL(:, d)) .*
fuGUcel(:, d, ind)) ./ (IC50CYP(:, d, :) + y((il+2)*Fco(:, d)+FentIL(:, d)) .*
fuGUcel(:, d, ind)), 1);

%calculate the dynamic CYP abundance
dtdy(c2D6) = kdCYPhe(ind, CYP2D6) * AbCYPhe(ind, CYP2D6) * (1 + InduLI
(CYP2D6)) - (kdCYPhe(ind, CYP2D6) + MechLI(CYP2D6)) * y(c2D6);
dtdy(c2D6+1) = kdCYPin(ind, CYP2D6) * AbCYPin(ind, CYP2D6, duo) * (1 +
InduDU(CYP2D6)) - (kdCYPin(ind, CYP2D6) + MechDU(CYP2D6)) * y(c2D6+1);
dtdy(c2D6+2) = kdCYPin(ind, CYP2D6) * AbCYPin(ind, CYP2D6, jej) * (1 +
InduJE(CYP2D6)) - (kdCYPin(ind, CYP2D6) + MechJE(CYP2D6)) * y(c2D6+2);
dtdy(c2D6+3) = kdCYPin(ind, CYP2D6) * AbCYPin(ind, CYP2D6, ile) * (1 +
InduIL(CYP2D6)) - (kdCYPin(ind, CYP2D6) + MechIL(CYP2D6)) * y(c2D6+3);

dtdy(c3A4) = kdCYPhe(ind, CYP3A4) * AbCYPhe(ind, CYP3A4) * (1 + InduLI
(CYP3A4)) - (kdCYPhe(ind, CYP3A4) + MechLI(CYP3A4)) * y(c3A4);
dtdy(c3A4+1) = kdCYPin(ind, CYP3A4) * AbCYPin(ind, CYP3A4, duo) * (1 +
InduDU(CYP3A4)) - (kdCYPin(ind, CYP3A4) + MechDU(CYP3A4)) * y(c3A4+1);
dtdy(c3A4+2) = kdCYPin(ind, CYP3A4) * AbCYPin(ind, CYP3A4, jej) * (1 +

```

```

InduJE(CYP3A4) - (kdCYPin(ind, CYP3A4) + MechJE(CYP3A4)) * y(c3A4+2);
    dtdy(c3A4+3) = kdCYPin(ind, CYP3A4) * AbCYPin(ind, CYP3A4, ile) * (1 +
InduIL(CYP3A4) - (kdCYPin(ind, CYP3A4) + MechIL(CYP3A4)) * y(c3A4+3);

    dtdy(c3A5) = kdCYPhe(ind, CYP3A5) * AbCYPhe(ind, CYP3A5) * (1 + InduLI
(CYP3A5)) - (kdCYPhe(ind, CYP3A5) + MechLI(CYP3A5)) * y(c3A5);
    dtdy(c3A5+1) = kdCYPin(ind, CYP3A5) * AbCYPin(ind, CYP3A5, duo) * (1 +
InduDU(CYP3A5) - (kdCYPin(ind, CYP3A5) + MechDU(CYP3A5)) * y(c3A5+1);
    dtdy(c3A5+2) = kdCYPin(ind, CYP3A5) * AbCYPin(ind, CYP3A5, jej) * (1 +
InduJE(CYP3A5) - (kdCYPin(ind, CYP3A5) + MechJE(CYP3A5)) * y(c3A5+2);
    dtdy(c3A5+3) = kdCYPin(ind, CYP3A5) * AbCYPin(ind, CYP3A5, ile) * (1 +
InduIL(CYP3A5) - (kdCYPin(ind, CYP3A5) + MechIL(CYP3A5)) * y(c3A5+3);

    dtdy(c2J2) = kdCYPhe(ind, CYP2J2) * AbCYPhe(ind, CYP2J2) * (1 + InduLI
(CYP2J2)) - (kdCYPhe(ind, CYP2J2) + MechLI(CYP2J2)) * y(c2J2);

%define competitive inhibition
CYPComLI = reshape(1 + sum((((y((li+2)*Fco(:, d)+FcellLI(:, d)) .* fuLIcel
(:, d, ind) .* FKICYP(:, d, :)) ./ KiCYP(:, d, :))), 1), SYSTEM.CYPlino, 1);

CYPComDU = reshape(1 + sum((((y((du+2)*Fco(:, d)+FentDU(:, d)) .* fuGUcel
(:, d, ind) .* FKICYP(:, d, :)) ./ KiCYP(:, d, :))), 1), SYSTEM.CYPlino, 1);
CYPComJE = reshape(1 + sum((((y((je+2)*Fco(:, d)+FentJE(:, d)) .* fuGUcel
(:, d, ind) .* FKICYP(:, d, :)) ./ KiCYP(:, d, :))), 1), SYSTEM.CYPlino, 1);
CYPComIL = reshape(1 + sum((((y((il+2)*Fco(:, d)+FentIL(:, d)) .* fuGUcel
(:, d, ind) .* FKICYP(:, d, :)) ./ KiCYP(:, d, :))), 1), SYSTEM.CYPlino, 1);

%define enzymatic metbaolism
CYPMetLI = (VmCYP(:, d) ./ ((KmCYP(:, d) .* CYPComLI) + y(li+2)*fucel(ind,
LI, d))) +...
    (CiCYP(:, d) ./ CYPComLI);

CYPMetDU = (VmCYP(:, d) ./ ((KmCYP(:, d) .* CYPComDU) + y(du+2)*fucel(ind,
GU, d))) +...
    (CiCYP(:, d) ./ CYPComDU);
CYPMetJE = (VmCYP(:, d) ./ ((KmCYP(:, d) .* CYPComJE) + y(je+2)*fucel(ind,
GU, d))) +...
    (CiCYP(:, d) ./ CYPComJE);
CYPMetIL = (VmCYP(:, d) ./ ((KmCYP(:, d) .* CYPComIL) + y(il+2)*fucel(ind,
GU, d))) +...
    (CiCYP(:, d) ./ CYPComIL);

%vascular space of compartments
dtdy(lu) = (1/Vvas(ind, LU)) * (Qorg(ind, LU)*y(vb) - QL(ind, LU)*y(lu) -
Porg(ind, LU)*(y(lu)/BP(d)) + PL(ind, LU)*y(lu+1));
dtdy(ad) = (1/Vvas(ind, AD)) * (Qorg(ind, AD)*y(ab) - QL(ind, AD)*y(ad) -
Porg(ind, AD)*(y(ad)/BP(d)) + PL(ind, AD)*y(ad+1));
dtdy(bo) = (1/Vvas(ind, BO)) * (Qorg(ind, BO)*y(ab) - QL(ind, BO)*y(bo) -
Porg(ind, BO)*(y(bo)/BP(d)) + PL(ind, BO)*y(bo+1));
dtdy(br) = (1/Vvas(ind, BR)) * (Qorg(ind, BR)*y(ab) - QL(ind, BR)*y(br) -
Porg(ind, BR)*(y(br)/BP(d)) + PL(ind, BR)*y(br+1));
dtdy(go) = (1/Vvas(ind, GO)) * (Qorg(ind, GO)*y(ab) - QL(ind, GO)*y(go) -
Porg(ind, GO)*(y(go)/BP(d)) + PL(ind, GO)*y(go+1));

```

```

    dtdy(he) = (1/Vvas(ind,HE)) * (Qorg(ind,HE)*y(ab) - QL(ind,HE)*y(he) -
Porg(ind,HE)*(y(he)/BP(d)) + PL(ind,HE)*y(he+1));
    dtdy(ki) = (1/Vvas(ind,KI)) * (Qorg(ind,KI)*y(ab) - QL(ind,KI)*y(ki) -
Porg(ind,KI)*(y(ki)/BP(d)) + PL(ind,KI)*y(ki+1) - CLre(ind,d)*y(ki));
    dtdy(mu) = (1/Vvas(ind,MU)) * (Qorg(ind,MU)*y(ab) - QL(ind,MU)*y(mu) -
Porg(ind,MU)*(y(mu)/BP(d)) + PL(ind,MU)*y(mu+1));
    dtdy(sk) = (1/Vvas(ind,SK)) * (Qorg(ind,SK)*y(ab) - QL(ind,SK)*y(sk) -
Porg(ind,SK)*(y(sk)/BP(d)) + PL(ind,SK)*y(sk+1));
    dtdy(th) = (1/Vvas(ind,TH)) * (Qorg(ind,TH)*y(ab) - QL(ind,TH)*y(th) -
Porg(ind,TH)*(y(th)/BP(d)) + PL(ind,TH)*y(th+1));
    dtdy(gu) = (1/Vvas(ind,GU)) * (Qorg(ind,GU)*y(ab) - QL(ind,GU)*y(gu) -
Porg(ind,GU)*(y(gu)/BP(d)) + PL(ind,GU)*y(gu+1));
    dtdy(sp) = (1/Vvas(ind,SP)) * (Qorg(ind,SP)*y(ab) - QL(ind,SP)*y(sp) -
Porg(ind,SP)*(y(sp)/BP(d)) + PL(ind,SP)*y(sp+1));
    dtdy(pa) = (1/Vvas(ind,PA)) * (Qorg(ind,PA)*y(ab) - QL(ind,PA)*y(pa) -
Porg(ind,PA)*(y(pa)/BP(d)) + PL(ind,PA)*y(pa+1));
    dtdy(li) = (1/Vvas(ind,LI)) * (QHA(ind)*y(ab) + QBY(ind)*y(ab) + QL(ind,
GU)*y(gu) + QL(ind,SP)*y(sp) + QL(ind,PA)*y(pa) - QL(ind,LI)*y(li) - Porg(ind,LI)*
(y(li)/BP(d)) + PL(ind,LI)*y(li+1));
    dtdy(ln) = (1/Vvas(ind,LN)) * (Qorg(ind,LN)*y(ab) - Qorg(ind,LN)*y(ln) +
Ltot(ind)*y(ln+1) - Ltot(ind)*y(ln));
    dtdy(re) = (1/Vvas(ind,RE)) * (Qorg(ind,RE)*y(ab) - QL(ind,RE)*y(re) -
Porg(ind,RE)*(y(re)/BP(d)) + PL(ind,RE)*y(re+1));

    %interstitial space of compartments
    dtdy(lu+1) = (1/Vint(ind,LU)) * (Porg(ind,LU)*(y(lu)/BP(d)) - PL(ind,LU)*y
(lu+1) - Lorg(ind,LU)*y(lu+1) - Jin(ind,LU,d)*y(lu+1)*fuine(ind,LU,d) + Jout(ind,
LU,d)*y(lu+2)*fucel(ind,LU,d));
    dtdy(ad+1) = (1/Vint(ind,AD)) * (Porg(ind,AD)*(y(ad)/BP(d)) - PL(ind,AD)*y
(ad+1) - Lorg(ind,AD)*y(ad+1) - Jin(ind,AD,d)*y(ad+1)*fuine(ind,AD,d) + Jout(ind,
AD,d)*y(ad+2)*fucel(ind,AD,d));
    dtdy(bo+1) = (1/Vint(ind,BO)) * (Porg(ind,BO)*(y(bo)/BP(d)) - PL(ind,BO)*y
(bo+1) - Lorg(ind,BO)*y(bo+1) - Jin(ind,BO,d)*y(bo+1)*fuine(ind,BO,d) + Jout(ind,
BO,d)*y(bo+2)*fucel(ind,BO,d));
    dtdy(br+1) = (1/Vint(ind,BR)) * (Porg(ind,BR)*(y(br)/BP(d)) - PL(ind,BR)*y
(br+1) - Lorg(ind,BR)*y(br+1) - Jin(ind,BR,d)*y(br+1)*fuine(ind,BR,d) + Jout(ind,
BR,d)*y(br+2)*fucel(ind,BR,d));
    dtdy(go+1) = (1/Vint(ind,GO)) * (Porg(ind,GO)*(y(go)/BP(d)) - PL(ind,GO)*y
(go+1) - Lorg(ind,GO)*y(go+1) - Jin(ind,GO,d)*y(go+1)*fuine(ind,GO,d) + Jout(ind,
GO,d)*y(go+2)*fucel(ind,GO,d));
    dtdy(he+1) = (1/Vint(ind,HE)) * (Porg(ind,HE)*(y(he)/BP(d)) - PL(ind,HE)*y
(he+1) - Lorg(ind,HE)*y(he+1) - Jin(ind,HE,d)*y(he+1)*fuine(ind,HE,d) + Jout(ind,
HE,d)*y(he+2)*fucel(ind,HE,d));
    dtdy(ki+1) = (1/Vint(ind,KI)) * (Porg(ind,KI)*(y(ki)/BP(d)) - PL(ind,KI)*y
(ki+1) - Lorg(ind,KI)*y(ki+1) - Jin(ind,KI,d)*y(ki+1)*fuine(ind,KI,d) + Jout(ind,
KI,d)*y(ki+2)*fucel(ind,KI,d));
    dtdy(mu+1) = (1/Vint(ind,MU)) * (Porg(ind,MU)*(y(mu)/BP(d)) - PL(ind,MU)*y
(mu+1) - Lorg(ind,MU)*y(mu+1) - Jin(ind,MU,d)*y(mu+1)*fuine(ind,MU,d) + Jout(ind,
MU,d)*y(mu+2)*fucel(ind,MU,d));
    dtdy(sk+1) = (1/Vint(ind,SK)) * (Porg(ind,SK)*(y(sk)/BP(d)) - PL(ind,SK)*y
(sk+1) - Lorg(ind,SK)*y(sk+1) - Jin(ind,SK,d)*y(sk+1)*fuine(ind,SK,d) + Jout(ind,
SK,d)*y(sk+2)*fucel(ind,SK,d));
    dtdy(th+1) = (1/Vint(ind,TH)) * (Porg(ind,TH)*(y(th)/BP(d)) - PL(ind,TH)*y

```



```

(th+1) - Lorg(ind,TH)*y(th+1) - Jin(ind,TH,d)*y(th+1)*fuine(ind,TH,d) + Jout(ind,
TH,d)*y(th+2)*fucel(ind,TH,d);
    dtdy(gu+1) = (1/Vint(ind,GU)) * (Porg(ind,GU)*(y(gu)/BP(d)) - PL(ind,GU)*y
(gu+1) - Lorg(ind,GU)*y(gu+1)+...
                                Jin(ind,GU,d)*y(du+2)*fucel(ind,GU,d)+...
                                Jin(ind,GU,d)*y(je+2)*fucel(ind,GU,d)+...
                                Jin(ind,GU,d)*y(il+2)*fucel(ind,GU,d)+...
                                Jin(ind,GU,d)*y(cn+2)*fucel(ind,GU,d));
    dtdy(sp+1) = (1/Vint(ind,SP)) * (Porg(ind,SP)*(y(sp)/BP(d)) - PL(ind,SP)*y
(sp+1) - Lorg(ind,SP)*y(sp+1) - Jin(ind,SP,d)*y(sp+1)*fuine(ind,SP,d) + Jout(ind,
SP,d)*y(sp+2)*fucel(ind,SP,d);
    dtdy(pa+1) = (1/Vint(ind,PA)) * (Porg(ind,PA)*(y(pa)/BP(d)) - PL(ind,PA)*y
(pa+1) - Lorg(ind,PA)*y(pa+1) - Jin(ind,PA,d)*y(pa+1)*fuine(ind,PA,d) + Jout(ind,
PA,d)*y(pa+2)*fucel(ind,PA,d);
    dtdy(li+1) = (1/Vint(ind,LI)) * (Porg(ind,LI)*(y(li)/BP(d)) - PL(ind,LI)*y
(li+1) - Lorg(ind,LI)*y(li+1) - Jin(ind,LI,d)*y(li+1)*fuine(ind,LI,d) + Jout(ind,
LI,d)*y(li+2)*fucel(ind,LI,d);
    dtdy(ln+1) = (1/Vint(ind,LN)) * (Lorg(ind,AD)*y(ad+1) + Lorg(ind,BO)*y
(bo+1) + Lorg(ind,BR)*y(br+1) +...
                                Lorg(ind,GO)*y(go+1) + Lorg(ind,HE)*y
(he+1) + Lorg(ind,KI)*y(ki+1) +...
                                Lorg(ind,MU)*y(mu+1) + Lorg(ind,SK)*y
(sk+1) + Lorg(ind,TH)*y(th+1) +...
                                Lorg(ind,GU)*y(gu+1) + Lorg(ind,SP)*y
(sp+1) + Lorg(ind,PA)*y(pa+1) +...
                                Lorg(ind,LI)*y(li+1) + Lorg(ind,RE)*y
(re+1) + Lorg(ind,LU)*y(lu+1) - Ltot(ind)*y(ln+1)-...
                                Jin(ind,LN,d)*y(ln+1)*fuine(ind,LN,d) +
Jout(ind,LN,d)*y(ln+2)*fucel(ind,LN,d);
    dtdy(re+1) = (1/Vint(ind,RE)) * (Porg(ind,RE)*(y(re)/BP(d)) - PL(ind,RE)*y
(re+1) - Lorg(ind,RE)*y(re+1) - Jin(ind,RE,d)*y(re+1)*fuine(ind,RE,d) + Jout(ind,
RE,d)*y(re+2)*fucel(ind,RE,d);

    %intracellular space of compartments
    dtdy(lu+2) = (1/Vcel(ind,LU)) * (Jin(ind,LU,d)*y(lu+1)*fuine(ind,LU,d) -
Jout(ind,LU,d)*y(lu+2)*fucel(ind,LU,d);
    dtdy(ad+2) = (1/Vcel(ind,AD)) * (Jin(ind,AD,d)*y(ad+1)*fuine(ind,AD,d) -
Jout(ind,AD,d)*y(ad+2)*fucel(ind,AD,d);
    dtdy(bo+2) = (1/Vcel(ind,BO)) * (Jin(ind,BO,d)*y(bo+1)*fuine(ind,BO,d) -
Jout(ind,BO,d)*y(bo+2)*fucel(ind,BO,d);
    dtdy(br+2) = (1/Vcel(ind,BR)) * (Jin(ind,BR,d)*y(br+1)*fuine(ind,BR,d) -
Jout(ind,BR,d)*y(br+2)*fucel(ind,BR,d);
    dtdy(go+2) = (1/Vcel(ind,GO)) * (Jin(ind,GO,d)*y(go+1)*fuine(ind,GO,d) -
Jout(ind,GO,d)*y(go+2)*fucel(ind,GO,d);
    dtdy(he+2) = (1/Vcel(ind,HE)) * (Jin(ind,HE,d)*y(he+1)*fuine(ind,HE,d) -
Jout(ind,HE,d)*y(he+2)*fucel(ind,HE,d);
    dtdy(ki+2) = (1/Vcel(ind,KI)) * (Jin(ind,KI,d)*y(ki+1)*fuine(ind,KI,d) -
Jout(ind,KI,d)*y(ki+2)*fucel(ind,KI,d);
    dtdy(mu+2) = (1/Vcel(ind,MU)) * (Jin(ind,MU,d)*y(mu+1)*fuine(ind,MU,d) -
Jout(ind,MU,d)*y(mu+2)*fucel(ind,MU,d);
    dtdy(sk+2) = (1/Vcel(ind,SK)) * (Jin(ind,SK,d)*y(sk+1)*fuine(ind,SK,d) -
Jout(ind,SK,d)*y(sk+2)*fucel(ind,SK,d);
    dtdy(th+2) = (1/Vcel(ind,TH)) * (Jin(ind,TH,d)*y(th+1)*fuine(ind,TH,d) -

```

```

Jout(ind,TH,d)*y(th+2)*fucel(ind,TH,d);
    dtdy(sp+2) = (1/Vcel(ind,SP)) * (Jin(ind,SP,d)*y(sp+1)*fuine(ind,SP,d) -
Jout(ind,SP,d)*y(sp+2)*fucel(ind,SP,d);
    dtdy(pa+2) = (1/Vcel(ind,PA)) * (Jin(ind,PA,d)*y(pa+1)*fuine(ind,PA,d) -
Jout(ind,PA,d)*y(pa+2)*fucel(ind,PA,d);
    dtdy(li+2) = (1/Vcel(ind,LI)) * (Jin(ind,LI,d)*y(li+1)*fuine(ind,LI,d) -
Jout(ind,LI,d)*y(li+2)*fucel(ind,LI,d) - ...
    ((CYPMetLI(CYP2D6)*y(c2D6)*MPPGL(ind)*WLI
(ind)*1000) + ...
    (CYPMetLI(CYP3A4)*y(c3A4)*MPPGL(ind)*WLI
(ind)*1000) + ...
    (CYPMetLI(CYP3A5)*y(c3A5)*MPPGL(ind)*WLI
(ind)*1000) + ...
    (CYPMetLI(CYP2J2)*y(c2J2)*MPPGL(ind)*WLI
(ind)*1000) + ...
    (CLint(d)*MPPGL(ind)*WLI(ind)*1000) +
CLbi(ind,d)*y(li+2)*fucel(ind,LI,d));
    dtdy(ln+2) = (1/Vcel(ind,LN)) * (Jin(ind,LN,d)*y(ln+1)*fuine(ind,LN,d) -
Jout(ind,LN,d)*y(ln+2)*fucel(ind,LN,d);
    dtdy(re+2) = (1/Vcel(ind,RE)) * (Jin(ind,RE,d)*y(re+1)*fuine(ind,RE,d) -
Jout(ind,RE,d)*y(re+2)*fucel(ind,RE,d));

%blood pools
    dtdy(vb) = (1/Vvb(ind)) * (QL(ind,AD)*y(ad) + QL(ind,BO)*y(bo) + QL(ind,
BR)*y(br) + QL(ind,GO)*y(go) + ...
    QL(ind,HE)*y(he) + QL(ind,KI)*y(ki) + QL(ind,
MU)*y(mu) + QL(ind,SK)*y(sk) + ...
    QL(ind,TH)*y(th) + QL(ind,LI)*y(li) + Qorg
(ind,LN)*y(ln) + QL(ind,RE)*y(re) + ...
    Ltot(ind)*y(ln) - CO(ind)*y(vb));

    dtdy(ab) = (1/Vab(ind)) * (QL(ind,LU)*y(lu) - Qorg(ind,AD)*y(ab) - Qorg
(ind,BO)*y(ab) - Qorg(ind,BR)*y(ab) - ...
    Qorg(ind,GO)*y(ab) - Qorg(ind,HE)*y(ab) - Qorg
(ind,KI)*y(ab) - Qorg(ind,MU)*y(ab) - ...
    Qorg(ind,SK)*y(ab) - Qorg(ind,TH)*y(ab) - Qorg
(ind,GU)*y(ab) - Qorg(ind,SP)*y(ab) - ...
    Qorg(ind,PA)*y(ab) - QHA(ind)*y(ab) - QBY(ind)
*y(ab) - Qorg(ind,LN)*y(ab) - Qorg(ind,RE)*y(ab) - ...
    CLad(d)*y(ab));

%intestinal lumen
    dtdy(st) = (1/Vlum(ind,sto)) * (-ITT(ind,sto)*y(st)*Vlum(ind,sto));

    dtdy(du) = (1/Vlum(ind,duo)) * (ITT(ind,sto)*y(st)*Vlum(ind,sto) - ITT
(ind,duo)*y(du)*Vlum(ind,duo) - CLab(ind,duo,d)*y(du));
    dtdy(je) = (1/Vlum(ind,jej)) * (ITT(ind,duo)*y(du)*Vlum(ind,duo) - ITT
(ind,jej)*y(je)*Vlum(ind,jej) - CLab(ind,jej,d)*y(je));
    dtdy(il) = (1/Vlum(ind,ile)) * (ITT(ind,jej)*y(je)*Vlum(ind,jej) - ITT
(ind,ile)*y(il)*Vlum(ind,ile) - CLab(ind,ile,d)*y(il));
    dtdy(cn) = (1/Vlum(ind,col)) * (ITT(ind,ile)*y(il)*Vlum(ind,ile) - ITT
(ind,col)*y(cn)*Vlum(ind,col) - CLab(ind,col,d)*y(cn));
    dtdy(fs) = ITT(ind,col)*y(cn)*Vlum(ind,col);

```

```

%artificial uptake when a lag rate is necessary to delay Cmax / Tmax
dtdy(du+1) = ((CLab(ind,duo,d)*y(du)) / Vlum(ind,duo) - LagR(d)*y(du+1));
dtdy(je+1) = ((CLab(ind,jej,d)*y(je)) / Vlum(ind,jej) - LagR(d)*y(je+1));
dtdy(il+1) = ((CLab(ind,ile,d)*y(il)) / Vlum(ind,ile) - LagR(d)*y(il+1));
dtdy(cn+1) = ((CLab(ind,col,d)*y(cn)) / Vlum(ind,col) - LagR(d)*y(cn+1));

%enetrocytes
dtdy(du+2) = (1/Vent(ind,duo)) * (LagR(d)*y(du+1)*Vlum(ind,duo) - Jin(ind,
GU,d)*y(du+2)*fucel(ind,GU,d) - ...
((CYPMetDU(CYP2D6)*y(c2D6+1) + CYPMetDU
(CYP3A4)*y(c3A4+1) + CYPMetDU(CYP3A5)*y(c3A5+1)) * y(du+2)*fucel(ind,GU,d));
dtdy(je+2) = (1/Vent(ind,jej)) * (LagR(d)*y(je+1)*Vlum(ind,jej) - Jin(ind,
GU,d)*y(je+2)*fucel(ind,GU,d) - ...
((CYPMetJE(CYP2D6)*y(c2D6+2) + CYPMetJE
(CYP3A4)*y(c3A4+2) + CYPMetJE(CYP3A5)*y(c3A5+2)) * y(je+2)*fucel(ind,GU,d));
dtdy(il+2) = (1/Vent(ind,ile)) * (LagR(d)*y(il+1)*Vlum(ind,ile) - Jin(ind,
GU,d)*y(il+2)*fucel(ind,GU,d) - ...
((CYPMetIL(CYP2D6)*y(c2D6+3) + CYPMetIL
(CYP3A4)*y(c3A4+3) + CYPMetIL(CYP3A5)*y(c3A5+3)) * y(il+2)*fucel(ind,GU,d));
dtdy(cn+2) = (1/Vent(ind,col)) * (LagR(d)*y(cn+1)*Vlum(ind,col) - Jin(ind,
GU,d)*y(cn+2)*fucel(ind,GU,d));
end
end
end

```

```
function[] = PostProcessing()
%This function processes the data from the ODE solution and outputs the results
%Attention: Some statistical calculations (geomean, prctile) require
%the Statistical and Machine Learning toolbox

global DEF          %global DEF defines model parameters
global SYSTEM      %global SYSTEM defines sytem parameters
global DRUG        %global DRUG defines drug parameters
global DDI         %global DDI enhances drug parameters for DDI prediction
global STUDY       %global STUDY defines study design parameters
global MODEL       %global MODEL defines parameters important for modeling
global OBS         %global OBS saves observed parameters for the output
global RES         %global RES saves the results for post-processing
global MEAN        %global MEAN saves the mean of PK parameters
global STDV        %global STDV saves the standard deviation of PK parameters
global GEOM        %global GEOM saves the geometric mean of PK parameters
global PERC        %global PERC saves the percentiles of PK parameters

%post-processing is exemplarily shown for venous blood concentration

%variables used in this script
InDoEv = reshape(STUDY.DoseEventMat(:, 3, :), STUDY.NoEvents, DRUG.DrugNo);

IFD = zeros(1, DRUG.DrugNo);    %index for the first dosing event
ILD = zeros(1, DRUG.DrugNo);    %index for the last dosing event
for drug = 1:DRUG.DrugNo
    IFD(drug) = find(InDoEv(:, drug), 1, 'first');
    ILD(drug) = find(InDoEv(:, drug), 1, 'last');
end
IFD = repmat(IFD, 1, DDI.DDINo/DRUG.DrugNo);
ILD = repmat(ILD, 1, DDI.DDINo/DRUG.DrugNo);

Dose      = repmat(STUDY.Dose, STUDY.IndNo, DDI.DDINo/DRUG.DrugNo);

%__Extract the concentration from the ODE solution__
%extract the venous blood concentration from the solution
VenousConc = zeros(MODEL.NumPoints, STUDY.IndNo, DDI.DDINo);

for d = 1:DDI.DDINo
    for ind = 1:STUDY.IndNo
        venous = (ind-1)*MODEL.ODENo*DDI.DDINo + MODEL.ODENo*(d-1) + ...
            DEF.plasma + SYSTEM.SubNo(DEF.plasma);
        VenousConc(:, ind, d) = RES.Conc(:, venous) .* DDI.MolW(d);
    end
end

%calculate statistics for venous blood concentration
VenousConcMean = mean(VenousConc, 2);
VenousConcPerc = prctile(VenousConc, [5, 95], 2);

%__Calculate PK parameters__
%Cmax / Tmax / AUCt
Venous_PKparaT = Calc_PKparaT(VenousConc, RES.Time);
```

```
%extract AUCt for the last dose event for the extrapolation of the AUCinf
VB_AUCtLast = zeros(STUDY.IndNo, DDI.DDINO);
for d = 1:DDI.DDINO
    VB_AUCtLast(:, d) = Venous_PKparaT{3} (:, ILD(d), d);
end

%% Elimination rate and extrapolation of parameters %%%%%%%%%%%
Venous_PKparaINF = Calc_PKparaINF(VenousConc, RES.Time, VB_AUCtLast);

%% Statistics for PK parameters %%%%%%%%%%%
Venous_PKparaSTAT = Calc_PKparaSTAT(Venous_PKparaT, Venous_PKparaINF);

for dn = 1:DDI.DDINO
    MEAN.Venous_CmaxFirst(:, dn) = Venous_PKparaSTAT{1,1} (:, IFD(dn), dn);
    MEAN.Venous_TmaxFirst(:, dn) = Venous_PKparaSTAT{2,1} (:, IFD(dn), dn);
    MEAN.Venous_AUCtFirst(:, dn) = Venous_PKparaSTAT{3,1} (:, IFD(dn), dn);

    MEAN.Venous_CmaxLast(:, dn) = Venous_PKparaSTAT{1,1} (:, ILD(dn), dn);
    MEAN.Venous_TmaxLast(:, dn) = Venous_PKparaSTAT{2,1} (:, ILD(dn), dn);
    MEAN.Venous_AUCtLast(:, dn) = Venous_PKparaSTAT{3,1} (:, ILD(dn), dn);

    STDV.Venous_CmaxFirst(:, dn) = Venous_PKparaSTAT{1,2} (:, IFD(dn), dn);
    STDV.Venous_TmaxFirst(:, dn) = Venous_PKparaSTAT{2,2} (:, IFD(dn), dn);
    STDV.Venous_AUCtFirst(:, dn) = Venous_PKparaSTAT{3,2} (:, IFD(dn), dn);

    STDV.Venous_CmaxLast(:, dn) = Venous_PKparaSTAT{1,2} (:, ILD(dn), dn);
    STDV.Venous_TmaxLast(:, dn) = Venous_PKparaSTAT{2,2} (:, ILD(dn), dn);
    STDV.Venous_AUCtLast(:, dn) = Venous_PKparaSTAT{3,2} (:, ILD(dn), dn);

    GEOM.Venous_CmaxFirst(:, dn) = Venous_PKparaSTAT{1,3} (:, IFD(dn), dn);
    GEOM.Venous_TmaxFirst(:, dn) = Venous_PKparaSTAT{2,3} (:, IFD(dn), dn);
    GEOM.Venous_AUCtFirst(:, dn) = Venous_PKparaSTAT{3,3} (:, IFD(dn), dn);

    GEOM.Venous_CmaxLast(:, dn) = Venous_PKparaSTAT{1,3} (:, ILD(dn), dn);
    GEOM.Venous_TmaxLast(:, dn) = Venous_PKparaSTAT{2,3} (:, ILD(dn), dn);
    GEOM.Venous_AUCtLast(:, dn) = Venous_PKparaSTAT{3,3} (:, ILD(dn), dn);

    PERC.Venous_CmaxFirst(:, dn) = Venous_PKparaSTAT{1,4} (:, IFD(dn), dn);
    PERC.Venous_TmaxFirst(:, dn) = Venous_PKparaSTAT{2,4} (:, IFD(dn), dn);
    PERC.Venous_AUCtFirst(:, dn) = Venous_PKparaSTAT{3,4} (:, IFD(dn), dn);

    PERC.Venous_CmaxLast(:, dn) = Venous_PKparaSTAT{1,4} (:, ILD(dn), dn);
    PERC.Venous_TmaxLast(:, dn) = Venous_PKparaSTAT{2,4} (:, ILD(dn), dn);
    PERC.Venous_AUCtLast(:, dn) = Venous_PKparaSTAT{3,4} (:, ILD(dn), dn);
end

MEAN.Venous_Thalf = Venous_PKparaSTAT{4,1};
STDV.Venous_Thalf = Venous_PKparaSTAT{4,2};
GEOM.Venous_Thalf = Venous_PKparaSTAT{4,3};
PERC.Venous_Thalf = Venous_PKparaSTAT{4,4};

MEAN.Venous_AUCinf = Venous_PKparaSTAT{5,1};
```

```

STDV.Venous_AUCinf = Venous_PKparaSTAT{5,2};
GEOM.Venous_AUCinf = Venous_PKparaSTAT{5,3};
PERC.Venous_AUCinf = Venous_PKparaSTAT{5,4};

```

```

MEAN.Venous_CLF = Venous_PKparaSTAT{6,1};
STDV.Venous_CLF = Venous_PKparaSTAT{6,2};
GEOM.Venous_CLF = Venous_PKparaSTAT{6,3};
PERC.Venous_CLF = Venous_PKparaSTAT{6,4};

```

```

MEAN.Venous_VDF = Venous_PKparaSTAT{7,1};
STDV.Venous_VDF = Venous_PKparaSTAT{7,2};
GEOM.Venous_VDF = Venous_PKparaSTAT{7,3};
PERC.Venous_VDF = Venous_PKparaSTAT{7,4};

```

```

MEAN.Venous_AUCratio = Venous_PKparaSTAT{8,1};
STDV.Venous_AUCratio = Venous_PKparaSTAT{8,2};
GEOM.Venous_AUCratio = Venous_PKparaSTAT{8,3};
PERC.Venous_AUCratio = Venous_PKparaSTAT{8,4};

```

```
%_output results
```

```
%figure for concentration output
```

```
Create_Figure(RES.Time, VenousConcMean, VenousConcPerc);
```

```
%output parameters on screen
```

```
switch DRUG.DrugNo
```

```
case 1
```

```

d = 1;
fprintf('Calculated PK parameters for %s:\n', DDI.Name{d});
fprintf('Cmax [ng/mL]: %g %g %g\n', [MEAN.Venous_CmaxFirst(d), PERC.Venous_CmaxFirst(1,d), PERC.Venous_CmaxFirst(3,d)]);
fprintf('Tmax [h]: %g %g %g\n', [MEAN.Venous_TmaxFirst(d), PERC.Venous_TmaxFirst(1,d), PERC.Venous_TmaxFirst(3,d)]);
fprintf('AUCt [ng*mL/h]: %g %g %g\n', [MEAN.Venous_AUCtLast(d), PERC.Venous_AUCtLast(1,d), PERC.Venous_AUCtLast(3,d)]);
fprintf('AUCinf [ng*mL/h]: %g %g %g\n', [MEAN.Venous_AUCinf(d), PERC.Venous_AUCinf(1,d), PERC.Venous_AUCinf(3,d)]);
fprintf('CL [L/h]: %g %g %g\n', [MEAN.Venous_CLF(d), PERC.Venous_CLF(1,d), PERC.Venous_CLF(3,d)]);
fprintf('VD [L/kg]: %g %g %g\n\n', [MEAN.Venous_VDF(d), PERC.Venous_VDF(1,d), PERC.Venous_VDF(3,d)]);

```

```
case 2
```

```
for d = 1:DDI.DDINo
```

```
switch d
```

```
case 1
```

```

fprintf('Calculated PK parameters for %s:\n', DDI.Name{d});
fprintf('Cmax [ng/mL]: %g %g %g\n', [MEAN.Venous_CmaxFirst(d), PERC.Venous_CmaxFirst(1,d), PERC.Venous_CmaxFirst(3,d)]);
fprintf('Tmax [h]: %g %g %g\n', [MEAN.Venous_TmaxFirst(d), PERC.Venous_TmaxFirst(1,d), PERC.Venous_TmaxFirst(3,d)]);
fprintf('AUCt [ng*mL/h]: %g %g %g\n', [MEAN.Venous_AUCtLast(d), PERC.Venous_AUCtLast(1,d), PERC.Venous_AUCtLast(3,d)]);
fprintf('AUCinf [ng*mL/h]: %g %g %g\n', [MEAN.Venous_AUCinf(d), PERC.Venous_AUCinf(1,d), PERC.Venous_AUCinf(3,d)]);

```

```
Venous_AUCinf(d), PERC.Venous_AUCinf(1,d), PERC.Venous_AUCinf(3,d)];  
fprintf('CL [L/h]: %g %g %g\n', [MEAN.↵  
Venous_CLF(d), PERC.Venous_CLF(1,d), PERC.Venous_CLF(3,d)];  
fprintf('VD [L/kg]: %g %g %g\n\n', [MEAN.↵  
Venous_VDF(d), PERC.Venous_VDF(1,d), PERC.Venous_VDF(3,d)];
```

case 2

```
fprintf('Calculated PK parameters for %s:\n', DDI.Name{d});  
fprintf('Cmax [ng/mL]: %g %g %g\n', [MEAN.↵  
Venous_CmaxFirst(d), PERC.Venous_CmaxFirst(1,d), PERC.Venous_CmaxFirst(3,d)];  
fprintf('Tmax [h]: %g %g %g\n', [MEAN.↵  
Venous_TmaxFirst(d), PERC.Venous_TmaxFirst(1,d), PERC.Venous_TmaxFirst(3,d)];  
fprintf('AUCt [ng*mL/h]: %g %g %g\n', [MEAN.↵  
Venous_AUCtLast(d), PERC.Venous_AUCtLast(1,d), PERC.Venous_AUCtLast(3,d)];  
fprintf('AUCinf [ng*mL/h]: %g %g %g\n', [MEAN.↵  
Venous_AUCinf(d), PERC.Venous_AUCinf(1,d), PERC.Venous_AUCinf(3,d)];  
fprintf('CL [L/h]: %g %g %g\n', [MEAN.↵  
Venous_CLF(d), PERC.Venous_CLF(1,d), PERC.Venous_CLF(3,d)];  
fprintf('VD [L/kg]: %g %g %g\n\n', [MEAN.↵  
Venous_VDF(d), PERC.Venous_VDF(1,d), PERC.Venous_VDF(3,d)];
```

case 3

```
fprintf('Calculated PK parameters for %s:\n', DDI.Name{d});  
fprintf('Cmax [ng/mL]: %g %g %g\n', [MEAN.↵  
Venous_CmaxFirst(d), PERC.Venous_CmaxFirst(1,d), PERC.Venous_CmaxFirst(3,d)];  
fprintf('Tmax [h]: %g %g %g\n', [MEAN.↵  
Venous_TmaxFirst(d), PERC.Venous_TmaxFirst(1,d), PERC.Venous_TmaxFirst(3,d)];  
fprintf('AUCt [ng*mL/h]: %g %g %g\n', [MEAN.↵  
Venous_AUCtLast(d), PERC.Venous_AUCtLast(1,d), PERC.Venous_AUCtLast(3,d)];  
fprintf('AUCinf [ng*mL/h]: %g %g %g\n', [MEAN.↵  
Venous_AUCinf(d), PERC.Venous_AUCinf(1,d), PERC.Venous_AUCinf(3,d)];  
fprintf('CL [L/h]: %g %g %g\n', [MEAN.↵  
Venous_CLF(d), PERC.Venous_CLF(1,d), PERC.Venous_CLF(3,d)];  
fprintf('VD [L/kg]: %g %g %g\n', [MEAN.↵  
Venous_VDF(d), PERC.Venous_VDF(1,d), PERC.Venous_VDF(3,d)];  
fprintf('AUC ratio %g %g %g\n\n', [MEAN.↵  
Venous_AUCratio(1), PERC.Venous_AUCratio(1,1), PERC.Venous_AUCratio(3,1)];
```

case 4

```
fprintf('Calculated PK parameters for %s:\n', DDI.Name{d});  
fprintf('Cmax [ng/mL]: %g %g %g\n', [MEAN.↵  
Venous_CmaxFirst(d), PERC.Venous_CmaxFirst(1,d), PERC.Venous_CmaxFirst(3,d)];  
fprintf('Tmax [h]: %g %g %g\n', [MEAN.↵  
Venous_TmaxFirst(d), PERC.Venous_TmaxFirst(1,d), PERC.Venous_TmaxFirst(3,d)];  
fprintf('AUCt [ng*mL/h]: %g %g %g\n', [MEAN.↵  
Venous_AUCtLast(d), PERC.Venous_AUCtLast(1,d), PERC.Venous_AUCtLast(3,d)];  
fprintf('AUCinf [ng*mL/h]: %g %g %g\n', [MEAN.↵  
Venous_AUCinf(d), PERC.Venous_AUCinf(1,d), PERC.Venous_AUCinf(3,d)];  
fprintf('CL [L/h]: %g %g %g\n', [MEAN.↵  
Venous_CLF(d), PERC.Venous_CLF(1,d), PERC.Venous_CLF(3,d)];  
fprintf('VD [L/kg]: %g %g %g\n', [MEAN.↵  
Venous_VDF(d), PERC.Venous_VDF(1,d), PERC.Venous_VDF(3,d)];  
fprintf('AUC ratio %g %g %g\n\n', [MEAN.↵
```

```
Venous_AUCratio(2), PERC.Venous_AUCratio(1,2), PERC.Venous_AUCratio(3,2));
    end
end

case 3
    for d = 1:DDI.DDINO
        switch d
            case 1
                fprintf('Calculated PK parameters for %s:\n', DDI.Name{d});
                fprintf('Cmax [ng/mL]:          %g      %g      %g\n', [MEAN.↵
Venous_CmaxFirst(d), PERC.Venous_CmaxFirst(1,d), PERC.Venous_CmaxFirst(3,d)]);
                fprintf('Tmax [h]:          %g      %g      %g\n', [MEAN.↵
Venous_TmaxFirst(d), PERC.Venous_TmaxFirst(1,d), PERC.Venous_TmaxFirst(3,d)]);
                fprintf('AUCt [ng*mL/h]:        %g      %g      %g\n', [MEAN.↵
Venous_AUCtLast(d), PERC.Venous_AUCtLast(1,d), PERC.Venous_AUCtLast(3,d)]);
                fprintf('AUCinf [ng*mL/h]:       %g      %g      %g\n', [MEAN.↵
Venous_AUCinf(d), PERC.Venous_AUCinf(1,d), PERC.Venous_AUCinf(3,d)]);
                fprintf('CL [L/h]:          %g      %g      %g\n', [MEAN.↵
Venous_CLF(d), PERC.Venous_CLF(1,d), PERC.Venous_CLF(3,d)]);
                fprintf('VD [L/kg]:          %g      %g      %g\n\n', [MEAN.↵
Venous_VDF(d), PERC.Venous_VDF(1,d), PERC.Venous_VDF(3,d)]);

            case 2
                fprintf('Calculated PK parameters for %s:\n', DDI.Name{d});
                fprintf('Cmax [ng/mL]:          %g      %g      %g\n', [MEAN.↵
Venous_CmaxFirst(d), PERC.Venous_CmaxFirst(1,d), PERC.Venous_CmaxFirst(3,d)]);
                fprintf('Tmax [h]:          %g      %g      %g\n', [MEAN.↵
Venous_TmaxFirst(d), PERC.Venous_TmaxFirst(1,d), PERC.Venous_TmaxFirst(3,d)]);
                fprintf('AUCt [ng*mL/h]:        %g      %g      %g\n', [MEAN.↵
Venous_AUCtLast(d), PERC.Venous_AUCtLast(1,d), PERC.Venous_AUCtLast(3,d)]);
                fprintf('AUCinf [ng*mL/h]:       %g      %g      %g\n', [MEAN.↵
Venous_AUCinf(d), PERC.Venous_AUCinf(1,d), PERC.Venous_AUCinf(3,d)]);
                fprintf('CL [L/h]:          %g      %g      %g\n', [MEAN.↵
Venous_CLF(d), PERC.Venous_CLF(1,d), PERC.Venous_CLF(3,d)]);
                fprintf('VD [L/kg]:          %g      %g      %g\n\n', [MEAN.↵
Venous_VDF(d), PERC.Venous_VDF(1,d), PERC.Venous_VDF(3,d)]);

            case 3
                fprintf('Calculated PK parameters for %s:\n', DDI.Name{d});
                fprintf('Cmax [ng/mL]:          %g      %g      %g\n', [MEAN.↵
Venous_CmaxFirst(d), PERC.Venous_CmaxFirst(1,d), PERC.Venous_CmaxFirst(3,d)]);
                fprintf('Tmax [h]:          %g      %g      %g\n', [MEAN.↵
Venous_TmaxFirst(d), PERC.Venous_TmaxFirst(1,d), PERC.Venous_TmaxFirst(3,d)]);
                fprintf('AUCt [ng*mL/h]:        %g      %g      %g\n', [MEAN.↵
Venous_AUCtLast(d), PERC.Venous_AUCtLast(1,d), PERC.Venous_AUCtLast(3,d)]);
                fprintf('AUCinf [ng*mL/h]:       %g      %g      %g\n', [MEAN.↵
Venous_AUCinf(d), PERC.Venous_AUCinf(1,d), PERC.Venous_AUCinf(3,d)]);
                fprintf('CL [L/h]:          %g      %g      %g\n', [MEAN.↵
Venous_CLF(d), PERC.Venous_CLF(1,d), PERC.Venous_CLF(3,d)]);
                fprintf('VD [L/kg]:          %g      %g      %g\n\n', [MEAN.↵
Venous_VDF(d), PERC.Venous_VDF(1,d), PERC.Venous_VDF(3,d)]);

            case 4
```



```

        fprintf('Calculated PK parameters for %s:\n', DDI.Name{d});
        fprintf('Cmax [ng/mL]:           %g           %g           %g\n', [MEAN.↵
Venous_CmaxFirst(d), PERC.Venous_CmaxFirst(1,d), PERC.Venous_CmaxFirst(3,d)]);
        fprintf('Tmax [h]:               %g           %g           %g\n', [MEAN.↵
Venous_TmaxFirst(d), PERC.Venous_TmaxFirst(1,d), PERC.Venous_TmaxFirst(3,d)]);
        fprintf('AUCt [ng*mL/h]:         %g           %g           %g\n', [MEAN.↵
Venous_AUCtLast(d), PERC.Venous_AUCtLast(1,d), PERC.Venous_AUCtLast(3,d)]);
        fprintf('AUCinf [ng*mL/h]:       %g           %g           %g\n', [MEAN.↵
Venous_AUCinf(d), PERC.Venous_AUCinf(1,d), PERC.Venous_AUCinf(3,d)]);
        fprintf('CL [L/h]:               %g           %g           %g\n', [MEAN.↵
Venous_CLF(d), PERC.Venous_CLF(1,d), PERC.Venous_CLF(3,d)]);
        fprintf('VD [L/kg]:              %g           %g           %g\n', [MEAN.↵
Venous_VDF(d), PERC.Venous_VDF(1,d), PERC.Venous_VDF(3,d)]);
        fprintf('AUC ratio                 %g           %g           %g\n\n', [MEAN.↵
Venous_AUCratio(1), PERC.Venous_AUCratio(1,1), PERC.Venous_AUCratio(3,1)]);

```

case 5

```

        fprintf('Calculated PK parameters for %s:\n', DDI.Name{d});
        fprintf('Cmax [ng/mL]:           %g           %g           %g\n', [MEAN.↵
Venous_CmaxFirst(d), PERC.Venous_CmaxFirst(1,d), PERC.Venous_CmaxFirst(3,d)]);
        fprintf('Tmax [h]:               %g           %g           %g\n', [MEAN.↵
Venous_TmaxFirst(d), PERC.Venous_TmaxFirst(1,d), PERC.Venous_TmaxFirst(3,d)]);
        fprintf('AUCt [ng*mL/h]:         %g           %g           %g\n', [MEAN.↵
Venous_AUCtLast(d), PERC.Venous_AUCtLast(1,d), PERC.Venous_AUCtLast(3,d)]);
        fprintf('AUCinf [ng*mL/h]:       %g           %g           %g\n', [MEAN.↵
Venous_AUCinf(d), PERC.Venous_AUCinf(1,d), PERC.Venous_AUCinf(3,d)]);
        fprintf('CL [L/h]:               %g           %g           %g\n', [MEAN.↵
Venous_CLF(d), PERC.Venous_CLF(1,d), PERC.Venous_CLF(3,d)]);
        fprintf('VD [L/kg]:              %g           %g           %g\n', [MEAN.↵
Venous_VDF(d), PERC.Venous_VDF(1,d), PERC.Venous_VDF(3,d)]);
        fprintf('AUC ratio                 %g           %g           %g\n\n', [MEAN.↵
Venous_AUCratio(2), PERC.Venous_AUCratio(1,2), PERC.Venous_AUCratio(3,2)]);

```

case 6

```

        fprintf('Calculated PK parameters for %s:\n', DDI.Name{d});
        fprintf('Cmax [ng/mL]:           %g           %g           %g\n', [MEAN.↵
Venous_CmaxFirst(d), PERC.Venous_CmaxFirst(1,d), PERC.Venous_CmaxFirst(3,d)]);
        fprintf('Tmax [h]:               %g           %g           %g\n', [MEAN.↵
Venous_TmaxFirst(d), PERC.Venous_TmaxFirst(1,d), PERC.Venous_TmaxFirst(3,d)]);
        fprintf('AUCt [ng*mL/h]:         %g           %g           %g\n', [MEAN.↵
Venous_AUCtLast(d), PERC.Venous_AUCtLast(1,d), PERC.Venous_AUCtLast(3,d)]);
        fprintf('AUCinf [ng*mL/h]:       %g           %g           %g\n', [MEAN.↵
Venous_AUCinf(d), PERC.Venous_AUCinf(1,d), PERC.Venous_AUCinf(3,d)]);
        fprintf('CL [L/h]:               %g           %g           %g\n', [MEAN.↵
Venous_CLF(d), PERC.Venous_CLF(1,d), PERC.Venous_CLF(3,d)]);
        fprintf('VD [L/kg]:              %g           %g           %g\n', [MEAN.↵
Venous_VDF(d), PERC.Venous_VDF(1,d), PERC.Venous_VDF(3,d)]);
        fprintf('AUC ratio                 %g           %g           %g\n\n', [MEAN.↵
Venous_AUCratio(3), PERC.Venous_AUCratio(1,3), PERC.Venous_AUCratio(3,3)]);

```

end

end

end

```

%=====
%% USED FUNCTION %%%%%%%%%%
%=====
% Calculate PK parameters
%% Cmax/Tmax/AUCt %%%%%%%%%%
function PKparaT = Calc_PKparaT(Conc, Time)

%prepare matrices for all calculated parameters
Cmax = zeros(STUDY.IndNo, STUDY.NoEvents, DDI.DDINo);
Tmax = zeros(STUDY.IndNo, STUDY.NoEvents, DDI.DDINo);
AUCt = zeros(STUDY.IndNo, STUDY.NoEvents, DDI.DDINo);
AUC = zeros(MODEL.NumPoints, STUDY.IndNo, DDI.DDINo);

%Time needs to be available for each individual and drug
Time = repmat(Time, 1, STUDY.IndNo, DDI.DDINo);

%point in time matrix to start and end each dosing event
TimePointST = reshape(STUDY.DoseEventMat(:, 1, :) .* STUDY.Resolution, ...
    STUDY.NoEvents, DRUG.DrugNo);
TimePointEN = reshape(STUDY.DoseEventMat(:, 2, :) .* STUDY.Resolution, ...
    STUDY.NoEvents, DRUG.DrugNo);

%the first index for the start point cannot be 0, but needs to be 1
TimePointST(1, :, :) = 1;

TimePointST = repmat(TimePointST, 1, DDI.DDINo / DRUG.DrugNo);
TimePointEN = repmat(TimePointEN, 1, DDI.DDINo / DRUG.DrugNo);

%Extract Cmax and Tmax for each dosing event and calculate AUCt
for sub = 1:STUDY.IndNo

    for dr = 1:DDI.DDINo

        for ev = 1:STUDY.NoEvents

            %Calculation of Cmax / Tmax are only done if a dose is given
            if TimePointST(ev, dr) ~= 0
                for t = TimePointST(ev, dr) : TimePointEN(ev, dr)
                    if Conc(t, sub, dr) > Cmax(sub, ev, dr)
                        Cmax(sub, ev, dr) = Conc(t, sub, dr);
                        Tmax(sub, ev, dr) = Time(t, sub, dr);
                    end

                    %trapezoidal method to calculate the AUC
                    if t == TimePointST(ev, dr)
                        AUC(t, sub, dr) = 0;
                    else
                        AUC(t, sub, dr) = ((Conc(t, sub, dr) + ...
                            Conc(t-1, sub, dr)) .* ...
                            (Time(t, sub, dr) - ...
                            Time(t-1, sub, dr)) ./ 2) + ...
                            AUC(t-1, sub, dr);
                    end
                end
            end
        end
    end
end

```



```

%save all results in one cell array
PKparaINF = {Thalf, AUCinf, CLF, VDF, AUCratio};
end

%% calculate statistics of PK parameters %%%%%%%%%%%%%%%%%%%%%%%%%%%%%%%%%%%%%%%%%%
function PKparaSTAT = Calc_PKparaSTAT(ParTIME, ParINF)

    per = [5, 50, 95];

    Mean_Cmax = mean(ParTIME{1}, 1);      Geom_Cmax = geomean(ParTIME{1}, 1);
    SD_Cmax   = std(ParTIME{1}, ' ', 1);  Perc_Cmax = prctile(ParTIME{1}, per, 1);

    Mean_Tmax = mean(ParTIME{2}, 1);      Geom_Tmax = geomean(ParTIME{2}, 1);
    SD_Tmax   = std(ParTIME{2}, ' ', 1);  Perc_Tmax = prctile(ParTIME{2}, per, 1);

    Mean_AUCt = mean(ParTIME{3}, 1);      Geom_AUCt = geomean(ParTIME{3}, 1);
    SD_AUCt   = std(ParTIME{3}, ' ', 1);  Perc_AUCt = prctile(ParTIME{3}, per, 1);

    Mean_Thalf = mean(ParINF{1}, 1);      Geom_Thalf = geomean(ParINF{1}, 1);
    SD_Thalf   = std(ParINF{1}, ' ', 1);  Perc_Thalf = prctile(ParINF{1}, per, 1);

    Mean_AUCi = mean(ParINF{2}, 1);      Geom_AUCi = geomean(ParINF{2}, 1);
    SD_AUCi   = std(ParINF{2}, ' ', 1);  Perc_AUCi = prctile(ParINF{2}, per, 1);

    Mean_CLF = mean(ParINF{3}, 1);      Geom_CLF = geomean(ParINF{3}, 1);
    SD_CLF   = std(ParINF{3}, ' ', 1);  Perc_CLF = prctile(ParINF{3}, per, 1);

    Mean_VDF = mean(ParINF{4}, 1);      Geom_VDF = geomean(ParINF{4}, 1);
    SD_VDF   = std(ParINF{4}, ' ', 1);  Perc_VDF = prctile(ParINF{4}, per, 1);

    Mean_AUCra = mean(ParINF{5}, 1);     Geom_AUCra = geomean(ParINF{5}, 1);
    SD_AUCra   = std(ParINF{5}, ' ', 1); Perc_AUCra = prctile(ParINF{5}, per, 1);

%save results
PKparaSTAT = {Mean_Cmax, SD_Cmax, Geom_Cmax, Perc_Cmax; ...
              Mean_Tmax, SD_Tmax, Geom_Tmax, Perc_Tmax; ...
              Mean_AUCt, SD_AUCt, Geom_AUCt, Perc_AUCt; ...
              Mean_Thalf, SD_Thalf, Geom_Thalf, Perc_Thalf; ...
              Mean_AUCi, SD_AUCi, Geom_AUCi, Perc_AUCi; ...
              Mean_CLF, SD_CLF, Geom_CLF, Perc_CLF; ...
              Mean_VDF, SD_VDF, Geom_VDF, Perc_VDF; ...
              Mean_AUCra, SD_AUCra, Geom_AUCra, Perc_AUCra};

end

%_Output plasma concentration
function FigPlot = Create_Figure(Time, Mean, Perc)

%prepare simulation time for the visualisation of the 95% CI
DDIplotT = [Time', fliplr(Time')];
DDIplotL = [Time(2:MODEL.NumPoints)', fliplr(Time(2:MODEL.NumPoints)')];

```

```
switch DRUG.DrugNo

    case 1
        Plot1 = figure;

        %first subplot shows concentration
        subplot(1,2,1); hold on;
        %draw area between percentiles
        Plot1t = area(Time, [Perc(:,1,1), Perc(:,2,1) - Perc(:,1,1)], ←
'LineStyle', 'none');
        %the area between x.axis and 5% CI should be white
        Plot1t(1).FaceColor = [1 1 1];
        %the area between 5 and 95% CI gets a light green
        Plot1t(2).FaceColor = [0.88 0.94 0.85];
        plot(Time, Mean(:,1), '-k', 'LineWidth', 1.5);
        errorbar(OBS.Time_Drug1, OBS.Conc_Drug1, OBS.SD_Drug1, 'or', ←
'LineWidth', 1.5);
        xlabel('Time [h]', 'fontweight', 'bold', 'fontsize', 12);
        ylabel('Venous Conc. [ng/mL]', 'fontweight', 'bold', 'fontsize', 12);
        set(gca, 'fontsize', 12);

        %second subplot shows concentration on a log scale
        subplot(1,2,2); hold on;
        %draw area between percentiles
        Plot1t = area(Time, [Perc(:,1,1), Perc(:,2,1) - Perc(:,1,1)], ←
'LineStyle', 'none');
        %the area between x.axis and 5% CI should be white
        Plot1t(1).FaceColor = [1 1 1];
        %the area between 5 and 95% CI gets a light green
        Plot1t(2).FaceColor = [0.88 0.94 0.85];
        plot(Time(2:MODEL.NumPoints), Mean(2:MODEL.NumPoints,1), 'k', ←
'LineWidth', 1.5);
        errorbar(OBS.Time_Drug1, OBS.Conc_Drug1, OBS.SD_Drug1, 'or', ←
'LineWidth', 1.5);
        set(gca, 'fontsize', 12);
        set(gca, 'Yscale', 'log');
        set(gca, 'ycolor', 'k');
        set(gca, 'xcolor', 'k');
        xlabel('Time [h]', 'fontweight', 'bold', 'fontsize', 12);
        ylabel('Plasma Conc. [ng/mL]', 'fontweight', 'bold', 'fontsize', 12);
        text(-0.3,1.05, DDI.Name{1}, 'Units', 'normalized', 'fontweight', ←
'bold' , 'fontsize', 14);
        set(Plot1, 'Units', 'normalized', 'Position', [0.2 0.2 0.6 0.6]);

    case 2
        for dr = 1:DDI.DDINo
            switch dr

                case 1
                    Plot1 = figure;

                    %first subplot shows concentration
```

```
subplot(1,2,1); hold on;
%draw area between percentiles
Plot1t = area(Time, [Perc(:,1,dr), Perc(:,2,dr) - Perc(:,1,dr)], 'LineStyle', 'none');
%the area between x.axis and 5% CI should be white
Plot1t(1).FaceColor = [1 1 1];
%the area between 5 and 95% CI gets a light green
Plot1t(2).FaceColor = [0.88 0.94 0.85];
plot(Time, Mean(:,dr), '-k', 'LineWidth', 1.5);
errorbar(OBS.Time_Drug1, OBS.Conc_Drug1, OBS.SD_Drug1, 'or', 'LineWidth', 1.5);
xlabel('Time [h]', 'fontweight', 'bold', 'fontsize', 12);
ylabel('Venous Conc. [ng/mL]', 'fontweight', 'bold', 'fontsize', 12);
set(gca, 'fontsize', 12);

%second subplot shows concentration on a log scale
subplot(1,2,2); hold on;
%draw area between percentiles
Plot1t = area(Time, [Perc(:,1,dr), Perc(:,2,dr) - Perc(:,1,dr)], 'LineStyle', 'none');
%the area between x.axis and 5% CI should be white
Plot1t(1).FaceColor = [1 1 1];
%the area between 5 and 95% CI gets a light green
Plot1t(2).FaceColor = [0.88 0.94 0.85];
plot(Time(2:MODEL.NumPoints), Mean(2:MODEL.NumPoints,dr), 'k', 'LineWidth', 1.5);
errorbar(OBS.Time_Drug1, OBS.Conc_Drug1, OBS.SD_Drug1, 'or', 'LineWidth', 1.5);
set(gca, 'fontsize', 12);
set(gca, 'Yscale', 'log');
set(gca, 'ycolor', 'k');
set(gca, 'xcolor', 'k');
xlabel('Time [h]', 'fontweight', 'bold', 'fontsize', 12);
ylabel('Plasma Conc. [ng/mL]', 'fontweight', 'bold', 'fontsize', 12);
text(-0.3,1.05, DDI.Name{dr}, 'Units', 'normalized', 'fontweight', 'bold', 'fontsize', 14);
set(Plot1, 'Units', 'normalized', 'Position', [0.2 0.2 0.6 0.6]);

case 2
Plot2 = figure;

%first subplot shows concentration
subplot(1,2,1); hold on;
%draw area between percentiles
Plot2t = area(Time, [Perc(:,1,dr), Perc(:,2,dr) - Perc(:,1,dr)], 'LineStyle', 'none');
%the area between x.axis and 5% CI should be white
Plot2t(1).FaceColor = [1 1 1];
%the area between 5 and 95% CI gets a light green
Plot2t(2).FaceColor = [0.88 0.94 0.85];
```

```
plot(Time, Mean(:,dr), '-k', 'LineWidth', 1.5);
errorbar(OBS.Time_Drug2, OBS.Conc_Drug2, OBS.SD_Drug2, '
'or', 'LineWidth', 1.5);
xlabel('Time [h]', 'fontweight', 'bold', 'fontsize', 12);
ylabel('Venous Conc. [ng/mL]', 'fontweight', 'bold', '
'fontsize', 12);
set(gca, 'fontsize', 12);

%second subplot shows concentration on a log scale
subplot(1,2,2); hold on;
%draw area between percentiles
Plot2t = area(Time, [Perc(:,1,dr), Perc(:,2,dr) - Perc(:,1,
dr)], 'LineStyle', 'none');
%the area between x.axis and 5% CI should be white
Plot2t(1).FaceColor = [1 1 1];
%the area between 5 and 95% CI gets a light green
Plot2t(2).FaceColor = [0.88 0.94 0.85];
plot(Time(2:MODEL.NumPoints), Mean(2:MODEL.NumPoints,dr), '
'k', 'LineWidth', 1.5);
errorbar(OBS.Time_Drug2, OBS.Conc_Drug2, OBS.SD_Drug2, '
'or', 'LineWidth', 1.5);
set(gca, 'fontsize', 12);
set(gca, 'Yscale', 'log');
set(gca, 'ycolor', 'k');
set(gca, 'xcolor', 'k');
xlabel('Time [h]', 'fontweight', 'bold', 'fontsize', 12);
ylabel('Plasma Conc. [ng/mL]', 'fontweight', 'bold', '
'fontsize', 12);
text(-0.3,1.05, DDI.Name{dr}, 'Units', 'normalized', '
'fontweight', 'bold', 'fontsize', 14);
set(Plot2, 'Units', 'normalized', 'Position', [0.2 0.2 0.6
0.6]);

case 3
Plot3 = figure;

%first subplot shows concentration
subplot(1,2,1); hold on;

%draw area between percentiles
DDI1_area_Subst = [Perc(:,1,1)', fliplr(Perc(:,2,1)')];
DDI1_area_Perp = [Perc(:,1,3)', fliplr(Perc(:,2,3)')];
DDI1_area_SuPe = [Perc(:,2,1)', fliplr(Perc(:,1,3)')];

%fill different areas with different colours
fill(DDIplotT, DDI1_area_Subst, [0.88 0.94 0.85], '
'Edgecolor', 'none');
fill(DDIplotT, DDI1_area_Perp, [0.81 0.92 1], 'Edgecolor', '
'none');
h = fill(DDIplotT, DDI1_area_SuPe, [0.35 0.63 0], '
'Edgecolor', 'none');
set(h, 'facealpha', 0.1)
```

```
%plot the concentrations
plot(Time, Mean(:,1), 'k', 'LineWidth', 1.5);
plot(Time, Mean(:,3), '--b', 'LineWidth', 1.5);
errorbar(OBS.Time_Drug1, OBS.Conc_Drug1, OBS.SD_Drug1, '
'or', 'LineWidth', 1.5);
errorbar(OBS.Time_DDI1, OBS.Conc_DDI1, OBS.SD_DDI1, '+r',
'LineWidth', 1.5);

xlabel('Time [h]', 'fontweight', 'bold', 'fontsize', 12);
ylabel('Plasma Conc. [ng/mL]', 'fontweight', 'bold',
'fontsize', 12);

set(gca, 'fontsize', 12);

%second subplot is in log scale
subplot(1,2,2); hold on;

%draw area between percentiles
DDI1_area_Subst = [Perc(2:MODEL.NumPoints,1,1)', fliplr
(Perc(2:MODEL.NumPoints,2,1)')]);
DDI1_area_Perp = [Perc(2:MODEL.NumPoints,1,3)', fliplr
(Perc(2:MODEL.NumPoints,2,3)')]);
DDI1_area_SuPe = [Perc(2:MODEL.NumPoints,2,1)', fliplr
(Perc(2:MODEL.NumPoints,1,3)')]);

%fill different areas with different colours
fill(DDIplotL, DDI1_area_Subst, [0.88 0.94 0.85],
'Edgecolor', 'none');
fill(DDIplotL, DDI1_area_Perp, [0.81 0.92 1], 'Edgecolor',
'none');
hlog = fill(DDIplotL, DDI1_area_SuPe, [0.35 0.63 0],
'Edgecolor', 'none');
set(hlog, 'facealpha', 0.1)

%plot the concentrations
plot(Time(2:MODEL.NumPoints), Mean(2:MODEL.NumPoints,1),
'k', 'LineWidth', 1.5);
plot(Time(2:MODEL.NumPoints), Mean(2:MODEL.NumPoints,3),
'--b', 'LineWidth', 1.5);
errorbar(OBS.Time_Drug1, OBS.Conc_Drug1, OBS.SD_Drug1,
'or', 'LineWidth', 1.5);
errorbar(OBS.Time_DDI1, OBS.Conc_DDI1, OBS.SD_DDI1, '+r',
'LineWidth', 1.5);

set(gca, 'fontsize', 12);
set(gca, 'Yscale', 'log');
set(gca, 'ycolor', 'k');
set(gca, 'xcolor', 'k');
xlabel('Time [h]', 'fontweight', 'bold', 'fontsize', 12);
ylabel('Plasma Conc. [ng/mL]', 'fontweight', 'bold',
'fontsize', 12);

text(-0.3,1.05, DDI.Name{dr}, 'Units', 'normalized',
'fontweight', 'bold', 'fontsize', 14);
set(Plot3, 'Units', 'normalized', 'Position', [0.2 0.2 0.6
0.6]);
```



```
case 4
    Plot4 = figure;

    %first subplot shows concentration
    subplot(1,2,1); hold on;

    %draw area between percentiles
    DDI1_area_Subst = [Perc(:,1,2)', fliplr(Perc(:,2,2)')];
    DDI1_area_Perp = [Perc(:,1,4)', fliplr(Perc(:,2,4)')];
    DDI1_area_SuPe = [Perc(:,2,2)', fliplr(Perc(:,1,4)')];

    %fill different areas with different colours
    fill(DDIplotT, DDI1_area_Subst, [0.88 0.94 0.85], \
'Edgecolor', 'none');
    fill(DDIplotT, DDI1_area_Perp, [0.81 0.92 1], 'Edgecolor', \
'none');
    h = fill(DDIplotT, DDI1_area_SuPe, [0.35 0.63 0], \
'Edgecolor', 'none');
    set(h, 'facealpha', 0.1)

    %plot the concentrations
    plot(Time, Mean(:,2), 'k', 'LineWidth', 1.5);
    plot(Time, Mean(:,4), '--b', 'LineWidth', 1.5);
    errorbar(OBS.Time_Drug2, OBS.Conc_Drug2, OBS.SD_Drug2, \
'or', 'LineWidth', 1.5);
    errorbar(OBS.Time_DDI2, OBS.Conc_DDI2, OBS.SD_DDI2, '+r', \
'LineWidth', 1.5);
    xlabel('Time [h]', 'fontweight', 'bold', 'fontsize', 12);
    ylabel('Plasma Conc. [ng/mL]', 'fontweight', 'bold', \
'fontsize', 12);
    set(gca, 'fontsize', 12);

    %second subplot is in log scale
    subplot(1,2,2); hold on;

    %draw area between percentiles
    DDI1_area_Subst = [Perc(2:MODEL.NumPoints,1,2)', fliplr \
(Perc(2:MODEL.NumPoints,2,2)')];
    DDI1_area_Perp = [Perc(2:MODEL.NumPoints,1,4)', fliplr \
(Perc(2:MODEL.NumPoints,2,4)')];
    DDI1_area_SuPe = [Perc(2:MODEL.NumPoints,2,2)', fliplr \
(Perc(2:MODEL.NumPoints,1,4)')];

    %fill different areas with different colours
    fill(DDIplotL, DDI1_area_Subst, [0.88 0.94 0.85], \
'Edgecolor', 'none');
    fill(DDIplotL, DDI1_area_Perp, [0.81 0.92 1], 'Edgecolor', \
'none');
    hlog = fill(DDIplotL, DDI1_area_SuPe, [0.35 0.63 0], \
'Edgecolor', 'none');
    set(hlog, 'facealpha', 0.1)

    %plot the concentrations
```

```

        plot(Time(2:MODEL.NumPoints), Mean(2:MODEL.NumPoints,2), 'k', 'LineWidth', 1.5);
        plot(Time(2:MODEL.NumPoints), Mean(2:MODEL.NumPoints,4), '--b', 'LineWidth', 1.5);
        errorbar(OBS.Time_Drug2, OBS.Conc_Drug2, OBS.SD_Drug2, 'or', 'LineWidth', 1.5);
        errorbar(OBS.Time_DDI2, OBS.Conc_DDI2, OBS.SD_DDI2, '+r', 'LineWidth', 1.5);

        set(gca, 'fontsize', 12);
        set(gca, 'Yscale', 'log');
        set(gca, 'ycolor', 'k');
        set(gca, 'xcolor', 'k');
        xlabel('Time [h]', 'fontweight', 'bold', 'fontsize', 12);
        ylabel('Plasma Conc. [ng/mL]', 'fontweight', 'bold', 'fontsize', 12);

        text(-0.3,1.05, DDI.Name{dr}, 'Units', 'normalized', 'fontweight', 'bold', 'fontsize', 14);
        set(Plot4, 'Units', 'normalized', 'Position', [0.2 0.2 0.6 0.6]);
    end
end

case 3
    for dr = 1:DDI.DDINo
        switch dr

            case 1
                Plot1 = figure;

                %first subplot shows concentration
                subplot(1,2,1); hold on;
                %draw area between percentiles
                Plot1t = area(Time, [Perc(:,1,dr), Perc(:,2,dr) - Perc(:,1,dr)], 'LineStyle', 'none');
                %the area between x.axis and 5% CI should be white
                Plot1t(1).FaceColor = [1 1 1];
                %the area between 5 and 95% CI gets a light green
                Plot1t(2).FaceColor = [0.88 0.94 0.85];
                plot(Time, Mean(:,dr), '-k', 'LineWidth', 1.5);
                errorbar(OBS.Time_Drug1, OBS.Conc_Drug1, OBS.SD_Drug1, 'or', 'LineWidth', 1.5);
                xlabel('Time [h]', 'fontweight', 'bold', 'fontsize', 12);
                ylabel('Venous Conc. [ng/mL]', 'fontweight', 'bold', 'fontsize', 12);

                set(gca, 'fontsize', 12);

                %second subplot shows concentration on a log scale
                subplot(1,2,2); hold on;
                %draw area between percentiles
                Plot1t = area(Time, [Perc(:,1,dr), Perc(:,2,dr) - Perc(:,1,dr)], 'LineStyle', 'none');
                %the area between x.axis and 5% CI should be white
                Plot1t(1).FaceColor = [1 1 1];

```

```

        %the area between 5 and 95% CI gets a light green
        Plot1t(2).FaceColor = [0.88 0.94 0.85];
        plot(Time(2:MODEL.NumPoints), Mean(2:MODEL.NumPoints,dr), \
'k', 'LineWidth', 1.5);
        errorbar(OBS.Time_Drug1, OBS.Conc_Drug1, OBS.SD_Drug1, \
'or', 'LineWidth', 1.5);
        set(gca, 'fontsize', 12);
        set(gca, 'Yscale', 'log');
        set(gca, 'ycolor', 'k');
        set(gca, 'xcolor', 'k');
        xlabel('Time [h]', 'fontweight', 'bold', 'fontsize', 12);
        ylabel('Plasma Conc. [ng/mL]', 'fontweight', 'bold', \
'fontsize', 12);
        text(-0.3,1.05, DDI.Name{dr}, 'Units', 'normalized', \
'fontweight', 'bold', 'fontsize', 14);
        set(Plot1, 'Units', 'normalized', 'Position', [0.2 0.2 0.6 \
0.6]);

        case 2
            Plot2 = figure;

            %first subplot shows concentration
            subplot(1,2,1); hold on;
            %draw area between percentiles
            Plot2t = area(Time, [Perc(:,1,dr), Perc(:,2,dr) - Perc(:,1, \
dr)], 'LineStyle', 'none');
            %the area between x.axis and 5% CI should be white
            Plot2t(1).FaceColor = [1 1 1];
            %the area between 5 and 95% CI gets a light green
            Plot2t(2).FaceColor = [0.88 0.94 0.85];
            plot(Time, Mean(:,dr), '-k', 'LineWidth', 1.5);
            errorbar(OBS.Time_Drug2, OBS.Conc_Drug2, OBS.SD_Drug2, \
'or', 'LineWidth', 1.5);
            xlabel('Time [h]', 'fontweight', 'bold', 'fontsize', 12);
            ylabel('Venous Conc. [ng/mL]', 'fontweight', 'bold', \
'fontsize', 12);
            set(gca, 'fontsize', 12);

            %second subplot shows concentration on a log scale
            subplot(1,2,2); hold on;
            %draw area between percentiles
            Plot2t = area(Time, [Perc(:,1,dr), Perc(:,2,dr) - Perc(:,1, \
dr)], 'LineStyle', 'none');
            %the area between x.axis and 5% CI should be white
            Plot2t(1).FaceColor = [1 1 1];
            %the area between 5 and 95% CI gets a light green
            Plot2t(2).FaceColor = [0.88 0.94 0.85];
            plot(Time(2:MODEL.NumPoints), Mean(2:MODEL.NumPoints,dr), \
'k', 'LineWidth', 1.5);
            errorbar(OBS.Time_Drug2, OBS.Conc_Drug2, OBS.SD_Drug2, \
'or', 'LineWidth', 1.5);
            set(gca, 'fontsize', 12);
            set(gca, 'Yscale', 'log');

```

```
set(gca, 'ycolor', 'k');
set(gca, 'xcolor', 'k');
xlabel('Time [h]', 'fontweight', 'bold', 'fontsize', 12);
ylabel('Plasma Conc. [ng/mL]', 'fontweight', 'bold',
'fontsize', 12);
text(-0.3,1.05, DDI.Name{dr}, 'Units', 'normalized',
'fontweight', 'bold' , 'fontsize', 14);
set(Plot2, 'Units', 'normalized', 'Position', [0.2 0.2 0.6
0.6]);

case 3
Plot3 = figure;

%first subplot shows concentration
subplot(1,2,1); hold on;
%draw area between percentiles
Plot3t = area(Time, [Perc(:,1,dr), Perc(:,2,dr) - Perc(:,1,
dr)], 'LineStyle', 'none');
%the area between x.axis and 5% CI should be white
Plot3t(1).FaceColor = [1 1 1];
%the area between 5 and 95% CI gets a light green
Plot3t(2).FaceColor = [0.88 0.94 0.85];
plot(Time, Mean(:,dr), '-k', 'LineWidth', 1.5);
errorbar(OBS.Time_Drug3, OBS.Conc_Drug3, OBS.SD_Drug3,
'or', 'LineWidth', 1.5);
xlabel('Time [h]', 'fontweight', 'bold', 'fontsize', 12);
ylabel('Venous Conc. [ng/mL]', 'fontweight', 'bold',
'fontsize', 12);
set(gca, 'fontsize', 12);

%second subplot shows concentration on a log scale
subplot(1,2,2); hold on;
%draw area between percentiles
Plot3t = area(Time, [Perc(:,1,dr), Perc(:,2,dr) - Perc(:,1,
dr)], 'LineStyle', 'none');
%the area between x.axis and 5% CI should be white
Plot3t(1).FaceColor = [1 1 1];
%the area between 5 and 95% CI gets a light green
Plot3t(2).FaceColor = [0.88 0.94 0.85];
plot(Time(2:MODEL.NumPoints), Mean(2:MODEL.NumPoints,dr),
'k', 'LineWidth', 1.5);
errorbar(OBS.Time_Drug3, OBS.Conc_Drug3, OBS.SD_Drug3,
'or', 'LineWidth', 1.5);
set(gca, 'fontsize', 12);
set(gca, 'Yscale', 'log');
set(gca, 'ycolor', 'k');
set(gca, 'xcolor', 'k');
xlabel('Time [h]', 'fontweight', 'bold', 'fontsize', 12);
ylabel('Plasma Conc. [ng/mL]', 'fontweight', 'bold',
'fontsize', 12);
text(-0.3,1.05, DDI.Name{dr}, 'Units', 'normalized',
'fontweight', 'bold' , 'fontsize', 14);
set(Plot3, 'Units', 'normalized', 'Position', [0.2 0.2 0.6
```

```
0.6]);
```

```

case 4
    Plot4 = figure;

    %first subplot shows concentration
    subplot(1,2,1); hold on;

    %draw area between percentiles
    DDI1_area_Subst = [Perc(:,1,1)', fliplr(Perc(:,2,1)')];
    DDI1_area_Perp  = [Perc(:,1,4)', fliplr(Perc(:,2,4)')];
    DDI1_area_SuPe  = [Perc(:,2,1)', fliplr(Perc(:,1,4)')];

    %fill the area between percentiles
    fill(DDIplotT, DDI1_area_Subst, [0.88 0.94 0.85], \
'Edgecolor', 'none');
    fill(DDIplotT, DDI1_area_Perp, [0.81 0.92 1], 'Edgecolor', \
'none');
    h = fill(DDIplotT, DDI1_area_SuPe, [0.35 0.63 0], \
'Edgecolor', 'none');
    set(h, 'facealpha', 0.1)

    %plot the concentration
    plot(Time, Mean(:,1), 'k', 'LineWidth', 1.5);
    plot(Time, Mean(:,4), '--b', 'LineWidth', 1.5);
    errorbar(OBS.Time_Drug1, OBS.Conc_Drug1, OBS.SD_Drug1, \
'or', 'LineWidth', 1.5);
    errorbar(OBS.Time_DDI1, OBS.Conc_DDI1, OBS.SD_DDI1, '+r', \
'LineWidth', 1.5);
    xlabel('Time [h]', 'fontweight', 'bold', 'fontsize', 12);
    ylabel('Plasma Conc. [ng/mL]', 'fontweight', 'bold', \
'fontsize', 12);
    set(gca, 'fontsize', 12);

    %second subplot shows concentration on a log scale
    subplot(1,2,2); hold on;

    %draw area between percentiles
    DDI1_area_Subst = [Perc(2:MODEL.NumPoints,1,1)', fliplr \
(Perc(2:MODEL.NumPoints,2,1)')];
    DDI1_area_Perp  = [Perc(2:MODEL.NumPoints,1,4)', fliplr \
(Perc(2:MODEL.NumPoints,2,4)')];
    DDI1_area_SuPe  = [Perc(2:MODEL.NumPoints,2,1)', fliplr \
(Perc(2:MODEL.NumPoints,1,4)')];

    %fill the area between percentiles
    fill(DDIplotL, DDI1_area_Subst, [0.88 0.94 0.85], \
'Edgecolor', 'none');
    fill(DDIplotL, DDI1_area_Perp, [0.81 0.92 1], 'Edgecolor', \
'none');
    hlog = fill(DDIplotL, DDI1_area_SuPe, [0.35 0.63 0], \
'Edgecolor', 'none');
    set(hlog, 'facealpha', 0.1)

```

```

        %plot the concentration
        plot(Time(2:MODEL.NumPoints), Mean(2:MODEL.NumPoints,1), 'k', 'LineWidth', 1.5);
        plot(Time(2:MODEL.NumPoints), Mean(2:MODEL.NumPoints,4), '--b', 'LineWidth', 1.5);
        errorbar(OBS.Time_Drug1, OBS.Conc_Drug1, OBS.SD_Drug1, 'or', 'LineWidth', 1.5);
        errorbar(OBS.Time_DDI1, OBS.Conc_DDI1, OBS.SD_DDI1, '+r', 'LineWidth', 1.5);

        set(gca, 'fontsize', 12);
        set(gca, 'Yscale', 'log');
        set(gca, 'ycolor', 'k');
        set(gca, 'xcolor', 'k');
        xlabel('Time [h]', 'fontweight', 'bold', 'fontsize', 12);
        ylabel('Plasma Conc. [ng/mL]', 'fontweight', 'bold', 'fontsize', 12);

        text(-0.3,1.05, DDI.Name{dr}, 'Units', 'normalized', 'fontweight', 'bold', 'fontsize', 14);
        set(Plot4, 'Units', 'normalized', 'Position', [0.2 0.2 0.6 0.6]);

    case 5
        Plot5 = figure;

        %first subplot shows concentration
        subplot(1,2,1); hold on;

        %draw area between percentiles
        DDI1_area_Subst = [Perc(:,1,2)', fliplr(Perc(:,2,2)')];
        DDI1_area_Perp = [Perc(:,1,5)', fliplr(Perc(:,2,5)')];
        DDI1_area_SuPe = [Perc(:,2,2)', fliplr(Perc(:,1,5)')];

        %fill the area between percentiles
        fill(DDIplotT, DDI1_area_Subst, [0.88 0.94 0.85], 'Edgecolor', 'none');
        fill(DDIplotT, DDI1_area_Perp, [0.81 0.92 1], 'Edgecolor', 'none');
        h = fill(DDIplotT, DDI1_area_SuPe, [0.35 0.63 0], 'Edgecolor', 'none');
        set(h, 'facealpha', 0.1)

        %plot the concentration
        plot(Time, Mean(:,2), 'b', 'LineWidth', 1.5);
        plot(Time, Mean(:,5), '--b', 'LineWidth', 1.5);
        errorbar(OBS.Time_Drug2, OBS.Conc_Drug2, OBS.SD_Drug2, 'or', 'LineWidth', 1.5);
        errorbar(OBS.Time_DDI2, OBS.Conc_DDI2, OBS.SD_DDI2, '+r', 'LineWidth', 1.5);

        xlabel('Time [h]', 'fontweight', 'bold', 'fontsize', 12);
        ylabel('Plasma Conc. [ng/mL]', 'fontweight', 'bold', 'fontsize', 12);

        set(gca, 'fontsize', 12);

```

```

%second subplot shows concentration on a log scale
subplot(1,2,2); hold on;

%draw area between percentiles
DDI1_area_Subst = [Perc(2:MODEL.NumPoints,1,2)', fliplr(
(Perc(2:MODEL.NumPoints,2,2)'))];
DDI1_area_Perp = [Perc(2:MODEL.NumPoints,1,5)', fliplr(
(Perc(2:MODEL.NumPoints,2,5)'))];
DDI1_area_SuPe = [Perc(2:MODEL.NumPoints,2,2)', fliplr(
(Perc(2:MODEL.NumPoints,1,5)'))];

%fill the area between percentiles
fill(DDIplotL, DDI1_area_Subst, [0.88 0.94 0.85],
'Edgecolor', 'none');
fill(DDIplotL, DDI1_area_Perp, [0.81 0.92 1], 'Edgecolor',
'none');
hlog = fill(DDIplotL, DDI1_area_SuPe, [0.35 0.63 0],
'Edgecolor', 'none');
set(hlog, 'facealpha', 0.1)

%plot the concentration
plot(Time(2:MODEL.NumPoints), Mean(2:MODEL.NumPoints,2),
'b', 'LineWidth', 1.5);
plot(Time(2:MODEL.NumPoints), Mean(2:MODEL.NumPoints,5),
'--b', 'LineWidth', 1.5);
errorbar(OBS.Time_Drug2, OBS.Conc_Drug2, OBS.SD_Drug2,
'or', 'LineWidth', 1.5);
errorbar(OBS.Time_DDI2, OBS.Conc_DDI2, OBS.SD_DDI2, '+r',
'LineWidth', 1.5);

set(gca, 'fontsize', 12);
set(gca, 'Yscale', 'log');
set(gca, 'ycolor', 'k');
set(gca, 'xcolor', 'k');
xlabel('Time [h]', 'fontweight', 'bold', 'fontsize', 12);
ylabel('Plasma Conc. [ng/mL]', 'fontweight', 'bold',
'fontsize', 12);
text(-0.3, 1.05, DDI.Name{dr}, 'Units', 'normalized',
'fontweight', 'bold', 'fontsize', 14);
set(Plot5, 'Units', 'normalized', 'Position', [0.2 0.2 0.6
0.6]);

```

case 6

```
Venous6 = figure;
```

```
%first subplot shows concentration
```

```
subplot(1,2,1); hold on;
```

```
%draw area between percentiles
```

```
DDI1_area_Subst = [Perc(:,1,3)', fliplr(Perc(:,2,3)')];
```

```
DDI1_area_Perp = [Perc(:,1,6)', fliplr(Perc(:,2,6)')];
```

```
DDI1_area_SuPe = [Perc(:,2,3)', fliplr(Perc(:,1,6)')];
```

```
%fill the area between percentiles
fill(DDIplotT, DDI1_area_Subst, [0.88 0.94 0.85], ←
'Edgecolor', 'none');
fill(DDIplotT, DDI1_area_Perp, [0.81 0.92 1], 'Edgecolor', ←
'none');
h = fill(DDIplotT, DDI1_area_SuPe, [0.35 0.63 0], ←
'Edgecolor', 'none');
set(h, 'facealpha', 0.1)

%plot the concentration
plot(Time, Mean(:,3), 'b', 'LineWidth', 1.5);
plot(Time, Mean(:,6), '--b', 'LineWidth', 1.5);
errorbar(OBS.Time_Drug3, OBS.Conc_Drug3, OBS.SD_Drug3, ←
'or', 'LineWidth', 1.5);
errorbar(OBS.Time_DDI3, OBS.Conc_DDI3, OBS.SD_DDI3, '+r', ←
'LineWidth', 1.5);
xlabel('Time [h]', 'fontweight', 'bold', 'fontsize', 12);
ylabel('Plasma Conc. [ng/mL]', 'fontweight', 'bold', ←
'fontsize', 12);
set(gca, 'fontsize', 12);

%second subplot shows concentration on a log scale
subplot(1,2,2); hold on;

%draw area between percentiles
DDI1_area_Subst = [Perc(2:MODEL.NumPoints,1,3)', fliplr ←
(Perc(2:MODEL.NumPoints,2,3)')]);
DDI1_area_Perp = [Perc(2:MODEL.NumPoints,1,6)', fliplr ←
(Perc(2:MODEL.NumPoints,2,3)')]);
DDI1_area_SuPe = [Perc(2:MODEL.NumPoints,2,3)', fliplr ←
(Perc(2:MODEL.NumPoints,1,6)')]);

%fill the area between percentiles
fill(DDIplotL, DDI1_area_Subst, [0.88 0.94 0.85], ←
'Edgecolor', 'none');
fill(DDIplotL, DDI1_area_Perp, [0.81 0.92 1], 'Edgecolor', ←
'none');
hlog = fill(DDIplotL, DDI1_area_SuPe, [0.35 0.63 0], ←
'Edgecolor', 'none');
set(hlog, 'facealpha', 0.1)

%plot the concentration
plot(Time(2:MODEL.NumPoints), Mean(2:MODEL.NumPoints,3), ←
'b', 'LineWidth', 1.5);
plot(Time(2:MODEL.NumPoints), Mean(2:MODEL.NumPoints,6), ←
'--b', 'LineWidth', 1.5);
errorbar(OBS.Time_Drug3, OBS.Conc_Drug3, OBS.SD_Drug3, ←
'or', 'LineWidth', 1.5);
errorbar(OBS.Time_DDI3, OBS.Conc_DDI3, OBS.SD_DDI3, '+r', ←
'LineWidth', 1.5);
set(gca, 'fontsize', 12);
set(gca, 'Yscale', 'log');
set(gca, 'ycolor', 'k');
```



```
        set(gca, 'xcolor', 'k');
        xlabel('Time [h]', 'fontweight', 'bold', 'fontsize', 12);
        ylabel('Plasma Conc. [ng/mL]', 'fontweight', 'bold', 'font
'fontsize', 12);
        text(-0.3, 1.05, DDI.Name{dr}, 'Units', 'normalized', '
'fontweight', 'bold', 'fontsize', 14);
        set(Venous6, 'Units', 'normalized', 'Position', [0.2 0.2
0.6 0.6]);
            end
        end
    end
FigPlot = 1;
end

end
```
